# Supplementary material for: Neuroinflammation in cognitive decline post-cardiac surgery (the FOCUS study): an observational study protocol
Source: PubMed Central journal article supplement — BMJ Open. 2021 May 11;11(5):e044062. doi: 10.1136/bmjopen-2020-044062 (PMC8118022; doi:10.1136/bmjopen-2020-044062), 2021-05-11
Supplement: bmjopen-2020-044062.draft_revisions.pdf [file bmjopen-2020-044062.draft_revisions.pdf]

# BMJ Open

BMJ Open is committed to open peer review. As part of this commitment we make the peer review history of every article we publish publicly available.

When an article is published we post the peer reviewers' comments and the authors' responses online. We also post the versions of the paper that were used during peer review. These are the versions that the peer review comments apply to.

The versions of the paper that follow are the versions that were submitted during the peer review process. They are not the versions of record or the final published versions. They should not be cited or distributed as the published version of this manuscript.

BMJ Open is an open access journal and the full, final, typeset and author-corrected version of record of the manuscript is available on our site with no access controls, subscription charges or pay-per-view fees (<http://bmjopen.bmj.com>).

If you have any questions on BMJ Open's open peer review process please email [info.bmjopen@bmj.com](mailto:info.bmjopen@bmj.com)

# BMJ Open

## Neuroinflammation in cognitive decline post-cardiac surgery (the FOCUS study): an observational study protocol

|                               |                                                                                                                                                                                                                                                                                                                                                                                                                                                                                                                                                                                                                                                                                                                                                                                                                                                                                                                                                                                                                                                                                                                                                                                                                                                                                                                                                                                                                                                                         |
|-------------------------------|-------------------------------------------------------------------------------------------------------------------------------------------------------------------------------------------------------------------------------------------------------------------------------------------------------------------------------------------------------------------------------------------------------------------------------------------------------------------------------------------------------------------------------------------------------------------------------------------------------------------------------------------------------------------------------------------------------------------------------------------------------------------------------------------------------------------------------------------------------------------------------------------------------------------------------------------------------------------------------------------------------------------------------------------------------------------------------------------------------------------------------------------------------------------------------------------------------------------------------------------------------------------------------------------------------------------------------------------------------------------------------------------------------------------------------------------------------------------------|
| Journal:                      | <i>BMJ Open</i>                                                                                                                                                                                                                                                                                                                                                                                                                                                                                                                                                                                                                                                                                                                                                                                                                                                                                                                                                                                                                                                                                                                                                                                                                                                                                                                                                                                                                                                         |
| Manuscript ID                 | bmjopen-2020-044062                                                                                                                                                                                                                                                                                                                                                                                                                                                                                                                                                                                                                                                                                                                                                                                                                                                                                                                                                                                                                                                                                                                                                                                                                                                                                                                                                                                                                                                     |
| Article Type:                 | Protocol                                                                                                                                                                                                                                                                                                                                                                                                                                                                                                                                                                                                                                                                                                                                                                                                                                                                                                                                                                                                                                                                                                                                                                                                                                                                                                                                                                                                                                                                |
| Date Submitted by the Author: | 22-Aug-2020                                                                                                                                                                                                                                                                                                                                                                                                                                                                                                                                                                                                                                                                                                                                                                                                                                                                                                                                                                                                                                                                                                                                                                                                                                                                                                                                                                                                                                                             |
| Complete List of Authors:     | Peters van Ton, Annemieke; Radboudumc, Department of Intensive Care Medicine; Radboudumc, Radboud Institute for Molecular Life Sciences Duindam, Harmke; Radboudumc, Department of Intensive Care Medicine; Radboudumc, Radboud Institute of Molecular Life Sciences van Tuijl, Julia; Radboudumc, Department of Internal Medicine; Radboudumc, Radboud Institute for Molecular Life Sciences Li, Wilson; Radboudumc, Department of Cardiothoracic Surgery Dieker, Hendrik-Jan; Radboudumc, Department of Cardiology Riksen, Niels; Radboudumc, Department of Internal Medicine; Radboudumc, Radboud Institute for Molecular Life Sciences Meijer, F.J.; Radboudumc, Department of Medical Imaging; Radboudumc, Radboud Institute for Health Sciences Kessels, Roy; Radboudumc, Department of Medical Psychology; Radboud University, Donders Center for Cognition Kohn, Nils; Radboudumc, Donders Institute for Brain, Cognition and Behaviour, Cognitive Neuroscience, van der Hoeven, J.G; Radboudumc, Department of Intensive Care Medicine; Radboudumc, Radboud Institute for Health Sciences Pickkers, Peter; Radboudumc, Department of Intensive Care Medicine; Radboudumc, Radboud Institute for Molecular Life Sciences Rijpkema, Mark; Radboudumc, Department of Medical Imaging; Radboudumc, Radboud Institute for Health Sciences Abdo, Wilson; Radboudumc, Department of Intensive Care Medicine; Radboudumc, Radboud Institute of Molecular Life Sciences |
| Keywords:                     | Cardiac surgery < SURGERY, IMMUNOLOGY, Delirium & cognitive disorders < PSYCHIATRY, NUCLEAR MEDICINE, INTENSIVE & CRITICAL CARE                                                                                                                                                                                                                                                                                                                                                                                                                                                                                                                                                                                                                                                                                                                                                                                                                                                                                                                                                                                                                                                                                                                                                                                                                                                                                                                                         |
|                               |                                                                                                                                                                                                                                                                                                                                                                                                                                                                                                                                                                                                                                                                                                                                                                                                                                                                                                                                                                                                                                                                                                                                                                                                                                                                                                                                                                                                                                                                         |

SCHOLARONE™  
Manuscripts

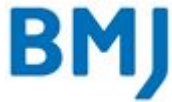

I, the Submitting Author has the right to grant and does grant on behalf of all authors of the Work (as defined in the below author licence), an exclusive licence and/or a non-exclusive licence for contributions from authors who are: i) UK Crown employees; ii) where BMJ has agreed a CC-BY licence shall apply, and/or iii) in accordance with the terms applicable for US Federal Government officers or employees acting as part of their official duties; on a worldwide, perpetual, irrevocable, royalty-free basis to BMJ Publishing Group Ltd ("BMJ") its licensees and where the relevant Journal is co-owned by BMJ to the co-owners of the Journal, to publish the Work in this journal and any other BMJ products and to exploit all rights, as set out in our [licence](#).

The Submitting Author accepts and understands that any supply made under these terms is made by BMJ to the Submitting Author unless you are acting as an employee on behalf of your employer or a postgraduate student of an affiliated institution which is paying any applicable article publishing charge ("APC") for Open Access articles. Where the Submitting Author wishes to make the Work available on an Open Access basis (and intends to pay the relevant APC), the terms of reuse of such Open Access shall be governed by a Creative Commons licence – details of these licences and which [Creative Commons](#) licence will apply to this Work are set out in our licence referred to above.

Other than as permitted in any relevant BMJ Author's Self Archiving Policies, I confirm this Work has not been accepted for publication elsewhere, is not being considered for publication elsewhere and does not duplicate material already published. I confirm all authors consent to publication of this Work and authorise the granting of this licence.

# Neuroinflammation in cognitive decline post-cardiac surgery (the FOCUS study): an observational study protocol

Annemieke M. Peters van Ton<sup>1,8\*</sup>, Harmke B. Duindam<sup>1,8\*</sup>, Julia van Tuijl<sup>2,8</sup>, Wilson W.L. Li<sup>3</sup>, Hendrik-Jan Dieker<sup>4</sup>, Niels P. Riksen<sup>2,8</sup>, F.J. Anton Meijer<sup>5,10</sup>, Roy P.C. Kessels<sup>6,7</sup>, Nils Kohn<sup>9</sup>, Johannes G. van der Hoeven<sup>1,10</sup>, Peter Pickkers<sup>1,8</sup>, Mark Rijpkema<sup>5,10</sup>, Wilson F. Abdo<sup>1,8</sup>

\* shared first authorship

<sup>1</sup> Radboud university medical center, Department of Intensive Care Medicine, Nijmegen, The Netherlands.

<sup>2</sup> Radboud university medical center, Department of Internal Medicine, Nijmegen, The Netherlands

<sup>3</sup> Radboud university medical center, Department of Cardiothoracic Surgery, Nijmegen, The Netherlands

<sup>4</sup> Radboud university medical center, Department of Cardiology, Nijmegen, The Netherlands

<sup>5</sup> Radboud university medical center, Department of Medical Imaging, Nijmegen, The Netherlands

<sup>6</sup> Radboud university medical center, Department of Medical Psychology, Nijmegen, The Netherlands

<sup>7</sup> Radboud University, Donders Centre for Cognition, Nijmegen, The Netherlands

<sup>8</sup> Radboud university medical center, Radboud Institute for Molecular Life Sciences, Nijmegen, The Netherlands

<sup>9</sup> Radboud university medical center, Donders Institute for Brain, Cognition and Behaviour, Cognitive Neuroscience, Nijmegen, The Netherlands

<sup>10</sup> Radboud university medical center, Radboud Institute for Health Sciences, Nijmegen, The Netherlands

## **Corresponding author**

Dr. Wilson F. Abdo, MD, PhD

Department of Intensive Care Medicine, IP 707

Radboud university medical center

P.O. Box 9101

6500 HB Nijmegen

The Netherlands

**Phone:** +31 (0) 24 36 17273

**Email:** [f.abdo@radboudumc.nl](mailto:f.abdo@radboudumc.nl)

**Word count:** 3783

## ABSTRACT

### Introduction

Postoperative cognitive dysfunction (POCD) occurs frequently after coronary artery bypass grafting (CABG). The underlying mechanisms remain poorly understood, but neuroinflammation might play a pivotal role. We hypothesize that systemic inflammation induced by the surgical trauma could activate the innate immune (glial) cells of the brain. This could lead to an exaggerated neuroinflammatory cascade, resulting in neuronal dysfunction and loss of neuronal cells. Therefore, the aims of this study are to assess neuroinflammation *in vivo* pre- and post-surgery in patients undergoing major cardiac surgery and investigate whether there is a relationship of neuroinflammation to cognitive outcomes, changes to brain structure and function, and systemic inflammation.

### Methods and analysis

The FOCUS study is a prospective, single-centre observational study, including 30 patients undergoing elective on-pump CABG. Translocator protein (TSPO) PET neuroimaging will be performed pre- and postoperatively using the second generation tracer <sup>18</sup>F-DPA-714 to assess the neuroinflammatory response. In addition, a comprehensive cerebral MRI will be performed pre- and post-surgery, in order to discover newly developed brain and vascular wall lesions. Up to 6 months postoperatively, serial extensive neurocognitive assessments will be performed and blood will be obtained to quantify systemic inflammatory responses and peripheral immune cell activation.

### Ethics and dissemination

Patients do not benefit directly from engaging in the study, but imaging neuroinflammation is considered safe and no side effects are expected. The study protocol obtained ethical approval by the Medical Research Ethics Committee (MREC) region Arnhem-Nijmegen. This work will be published in peer-reviewed international medical journals and presented at medical conferences.

## Article summary

### Strengths and limitations of this study

- This study is the first to examine *in vivo* neuroinflammation both prior to and after cardiac surgery and combines state of the art neuroimaging with longitudinal neuropsychological examinations and detailed immunological analyses
- This study could provide insights whether neuroinflammation plays a key role in POCD, which would make the neuroinflammatory response a future treatment target
- Extensive neuropsychological examinations at four different timepoints enable us to detect even subtle changes in cognitive function
- This study is powered to detect the association between neuroinflammation and cognitive decline between baseline and hospital discharge, the period of time the incidence of cognitive dysfunction is highest.

### Keywords

Postoperative cognitive dysfunction (POCD), coronary artery bypass grafting (CABG), neuroinflammation, microglia, TSPO neuroimaging

## INTRODUCTION

### Background and rationale

Coronary artery bypass grafting (CABG) has been associated with postoperative cerebral complications.[1-4] These may occur directly post-surgery, like stroke or delirium, but can also have long-term sequelae such as postoperative cognitive dysfunction (POCD) and dementia. The incidence of POCD ranges from 20-70% in the first week after surgery, to 10-40% in the following months but may increase again from one postoperative year onwards.[1, 5] Furthermore, a 1.7-fold increased risk to develop new incident Alzheimer's disease within 6 years after CABG was found, compared to patients undergoing a percutaneous coronary intervention.[6]

Development of POCD is presumably related to perioperative brain hypoperfusion, cerebral microembolization, haemodilution, hypercoagulability, cerebral hyperthermia and inadequate glucose homeostasis.[2] In addition, systemic inflammation is hypothesized as an important (and possibly treatable) factor for POCD pathogenesis.[7-9] Cardiac surgery produces substantial systemic inflammation due to multiple stimuli such as sternotomy, extracorporeal circulation (ECC), associated transient endotoxemia, and aortic cross-clamping. Severe systemic inflammation can result in increased permeability of the blood-brain barrier (BBB), enabling systemic inflammatory cytokines to enter the brain.[10, 11] As a result, systemic inflammation may induce activation of the innate immune cells of the brain, the microglia and astrocytes, leading to a neuroinflammatory response.[12] Animal models demonstrated that systemic administration of low-dose endotoxin even leads to long-term inflammatory reprogramming of microglia.[13] Interestingly, research has shown that neuroinflammation is associated with cognitive dysfunction and neurodegenerative disease.[14, 15] Given these associations, we hypothesize that occurrence of POCD in patients undergoing CABG is mediated through the occurrence of neuroinflammation.

Positron Emission Tomography (PET) enables the imaging of glial activation in the CNS using radiolabelled antagonists of translocator protein (TSPO).[16, 17] TSPO is mainly expressed as a transmembrane protein on mitochondria of microglia and astrocytes in the CNS.[18] As TSPO expression is upregulated during neuroinflammatory processes, it makes a promising biomarker for imaging neuroinflammation.[19] Up to now, TSPO neuroimaging has been applied in a wide variety of neurodegenerative and psychiatric conditions, showing associations between neuroinflammation and cognitive decline.[20-22] Recently, first *in vivo* evidence of microglial activity in response to systemic inflammation has been shown in patients and healthy volunteers.[23-25] However, human *in vivo* data on neuroinflammation in patients undergoing major cardiothoracic surgery are still lacking.

This study therefore aims to assess neuroinflammation pre- and post-surgery *in vivo* in patients undergoing elective cardiac surgery. Given the presumed association between neuroinflammation and cognitive decline, quantifying the extent of neuroinflammation post-surgery and its relation to POCD will provide us with important insights for future (interventional) research.

## Objectives

Our primary objective is to assess whether neuroinflammation is more pronounced in patients with cognitive decline at hospital discharge after CABG surgery, compared to patients without cognitive decline.

Secondary objectives:

1. To study the relation between the neuroinflammatory response and structural or functional changes to the brain postoperatively.
2. To study the relation between neuroinflammation and cognitive decline at 6 weeks and 6 months post-cardiac surgery.
3. To study the relation between neuroinflammation and postoperative delirium.
4. To study the relation between the perioperative systemic immune responses and neuroinflammation.

## METHODS AND ANALYSIS

### Study design

The FOCUS study (neuroinflammation in cognitive decline post cardiac surgery) is a single-centre observational time-series design study investigating neuroinflammation, systemic inflammation and neuropsychological performance before and after CABG.

### Study population and recruitment

All patients planned for elective CABG in an academic hospital in the Netherlands are screened. Table 1 presents the inclusion- and exclusion criteria. The age criterion of 50 years or older is chosen for two reasons. First, older adults are more prone to subsequent long-term cognitive decline after cardiac surgery.[26, 27] Second, ageing is associated with a more exaggerated neuroinflammatory response following systemic inflammation.[28]

Screening and enrolment logs will be maintained for all patients. After written informed consent is obtained, a blood sample will be genotyped for rs6971 polymorphism using Taqman analysis on a 7500 Fast Real-Time PCR System (ThermoFisher Scientific, Waltham, USA). Low-affinity TSPO binding patients for the radiotracer used in PET imaging will be excluded from participation. In our predominantly Caucasian cohort, the estimated percentage of low affinity binders is below 10%.[29]

**Table 1. Inclusion and exclusion criteria**

| Inclusion criteria   |                                                                                                                                                                                                                                                                                                                                                                                                                                                                                                                                                                      |
|----------------------|----------------------------------------------------------------------------------------------------------------------------------------------------------------------------------------------------------------------------------------------------------------------------------------------------------------------------------------------------------------------------------------------------------------------------------------------------------------------------------------------------------------------------------------------------------------------|
|                      | <ul style="list-style-type: none"> <li>• Written informed consent</li> <li>• Age &gt;50 years</li> <li>• Planned for elective on-pump coronary artery bypass grafting surgery</li> <li>• High- or mixed-affinity binders based on rs6971 polymorphism for translocator protein (TSPO)</li> <li>• Pre-hospital use of statins</li> </ul>                                                                                                                                                                                                                              |
| Exclusion criteria   |                                                                                                                                                                                                                                                                                                                                                                                                                                                                                                                                                                      |
| <i>Neurological</i>  | <ul style="list-style-type: none"> <li>• Neurodegenerative disease, including mild cognitive impairment</li> <li>• Brain or spinal surgery within the last 6 months</li> <li>• Meningitis or brain infection within the last 6 months</li> <li>• Brain injury (e.g. acute stroke, or subarachnoid haemorrhage) within the last 6 months</li> <li>• Severe brain trauma in previous medical history</li> <li>• Presence of a cerebrospinal fluid catheter or shunt</li> <li>• Presence of a known brain tumour</li> <li>• Pre-hospital use of neuroleptics</li> </ul> |
| <i>Inflammatory</i>  | <ul style="list-style-type: none"> <li>• Active infection (defined as fever &gt;38.5°C or antibiotic treatment) within the last 2 weeks prior to surgery</li> <li>• Immunocompromised state</li> <li>• Auto-immune or auto-inflammatory disease</li> </ul>                                                                                                                                                                                                                                                                                                           |
| <i>Cardiological</i> | <ul style="list-style-type: none"> <li>• Previous cardiac surgery</li> <li>• Cardiovascular event within the last 3 months</li> </ul>                                                                                                                                                                                                                                                                                                                                                                                                                                |
| <i>Other</i>         | <ul style="list-style-type: none"> <li>• Contra-indication to undergo a PET/CT or MRI scan</li> <li>• Known contrast allergy for gadolinium</li> <li>• Kidney failure (defined by a MDRD-GFR &lt;15ml/min/1.73m<sup>2</sup>)</li> <li>• Illiteracy or the inability to speak Dutch</li> <li>• Presence of disabilities that prevent accurate delirium diagnosis</li> <li>• Low TSPO binding affinity (based on rs6971 polymorphism)</li> </ul>                                                                                                                       |

## Data collection

Patients' demographics and information regarding their surgery indication, treatments, pre-existing comorbidity (Charlson Comorbidity Index), [30, 31] (re)admission, disease severity and mortality risk, length of mechanical ventilation, length of stay at the Intensive Care Unit (ICU) and occurrence of delirium will be retrieved from the patients' medical files. Table 2 shows an overview of events for this study, which will be defined subsequently in more detail.

**Table 2. Schedule of events**

| Timing:                       | Pre-clinical | Pre-operative                      | CABG           | Postoperative         |                        |                      | Follow-up |           |
|-------------------------------|--------------|------------------------------------|----------------|-----------------------|------------------------|----------------------|-----------|-----------|
|                               |              | T0<br>Baseline                     | T1<br>Stop ECC | T2<br>Stop ECC<br>+6h | T3<br>Incision<br>+24h | T4<br>CABG<br>+ 3-7d | T5<br>6 w | T6<br>6 m |
| Inclusion/exclusion criteria  | X            |                                    |                |                       |                        |                      |           |           |
| Informed consent              | X            |                                    |                |                       |                        |                      |           |           |
| TSPO binding affinity         | X            |                                    |                |                       |                        |                      |           |           |
| PET/CT cerebrum               |              | X                                  |                |                       |                        | X                    |           |           |
| MRI cerebrum                  |              | X                                  |                |                       |                        | X                    |           |           |
| Blood sampling                |              | X                                  | X              | X                     | X                      | X                    | X         |           |
| Neuropsychological assessment |              | X                                  |                |                       |                        | X                    | X         | X         |
| Delirium assessment           |              | 3 times daily during hospital stay |                |                       |                        |                      |           |           |

CABG = coronary artery bypass grafting; ECC = extracorporeal circulation; h=hours, d=days, w=weeks, m=months, TSPO = translocator protein, PET/CT = positron emission tomography/computed tomography, MRI: magnetic resonance imaging.



### *Cerebral imaging*

Dynamic brain PET/CT scans will be obtained preoperatively and on the fourth (range: 3<sup>rd</sup>-7<sup>th</sup>) postoperative day. Dynamic imaging of the head will be performed for 60 minutes after intravenous injection of the radiolabelled TSPO antagonist <sup>18</sup>F-DPA-714, a second generation TSPO ligand. A dose of ~200 MBq of <sup>18</sup>F-DPA-714 will be administered as a slow bolus injection during 40 seconds. Scans are obtained on a Siemens Biograph mCT hybrid PET/CT scanner (Siemens, Erlangen, Germany). A low-dose CT will be acquired for attenuation correction and anatomical reference. For pharmacokinetic analysis of the PET data arterial blood sampling will be used.

In addition, a 3 Tesla brain MRI (Siemens TIM TRIO, Erlangen, Germany) will be performed on the same days as the PET/CT scans. T1-weighted MR images will be obtained to co-register with the PET images for anatomical reference. Whole brain grey matter, as well as regions of interest will be delineated using probabilistic brain region templates. The slice thickness will be 1 mm. Additionally, the following MRI sequences will be performed: T2-weighted, susceptibility weighted imaging (SWI), FLAIR, diffusion tensor imaging (DTI), resting state fMRI, TOF MR angiogram of the circle of Willis and pre- and postcontrast 3D high-resolution T1-weighted SPACE sequence to visualize vessel wall abnormalities. In order to visualize cerebral vessel wall abnormalities, 0.1 mmol/kg gadobutrol (Gadovist) contrast agent will be administered intravenously. Details on MRI settings are provided in online supplementary appendix 1.

A senior neuroradiologist blinded to all other data will systematically quantify newly developed lesions post-surgery. This enables us to analyse the relationship between neuroinflammation, neuropsychological decline and cerebral lesion load. To evaluate changes in brain functional connectivity due to an acute immune response, a resting-state fMRI measurement is implemented comparing resting state connectivity in stress-related brain circuits pre- and post-surgery.[32, 33]

### *Blood sampling*

Blood samples will be obtained at baseline preoperatively (T0, concomitant with the PET-scan), intra-operatively at the stop of ECC (T1), 6 hours (T2) and 24 hours (T3) after incision. The timing of blood draws is based on the peak of the systemic inflammatory response post-cardiac surgery, as shown in previous studies we performed in patients undergoing cardiac surgery.[34, 35] Additionally, blood samples will be collected concomitant with the second PET/CT-scan (T4) and six weeks postoperatively (T5) to explore to what extent the inflammatory response persists in time.

At all timepoints, common blood parameters will be measured, including haemoglobin, leucocyte and thrombocyte count, and circulating pro-and anti-inflammatory cytokines (including tumour necrosis factor alpha (TNF- $\alpha$ ), interleukin-6 (IL-6), interleukin-1 $\beta$  (IL-1 $\beta$ ), interleukin-10 (IL-10) and interleukin-1 receptor antagonist (IL-1RA)). Blood will be centrifuged at 2000g for 10 minutes and the plasma will be stored at -80°C for possible future additional testing in line with the objective of this protocol. In addition, danger-associated molecular patterns (DAMPs, including high mobility group box 1 (HMGB1), heat shock protein-70 (HSP70), calgranulin-C (S100A12), calprotectin (S100A8/9), nuclear DNA, and mitochondrial DNA) will be measured in plasma centrifuged for a second time at high speed (16000 g).

1  
2  
3 Additionally, *ex vivo* production of cytokines by stimulated isolated peripheral blood  
4 mononuclear cells (PBMCs) will be measured, including TNF- $\alpha$ , IL-6, IL-1 $\beta$ , monocyte  
5 chemoattractant protein-1 (MCP1) and IL-10. Flow cytometry analysis of whole blood will be  
6 performed to study the inflammatory phenotype of the cells (including expression of human  
7 leukocyte antigen-DR (HLA-DR), C-C chemokine receptor type 2 (CCR2), CD11b, CD14 and  
8 CD16).  
9

10  
11 Arterial blood samples will be taken immediately before the  $^{18}\text{F}$ -DPA-714 injection and during  
12 the PET-scan to measure the time course of radioactivity in plasma. In addition to this  
13 pharmacokinetic sampling, blood samples will be used to assess the ratio of  $^{18}\text{F}$ -DPA-714 and  
14 its metabolites in order to correct the arterial input function for metabolite formation.  
15  
16

### 17 18 *Neuropsychological assessment*

19  
20 A trained psychologist will perform neuropsychological assessments preoperatively (T0), at  
21 hospital discharge (T4), after six weeks (T5) and six months (T6) follow-up. These assessments  
22 are in line with the recommendation for neuropsychological research in cardiac surgery  
23 patients.[36] Table 3 lists the full test battery used for the neuropsychological assessments as  
24 well as the self-report questionnaires. Tests were selected based on sensitivity to detect even  
25 subtle deterioration in cognitive performance, with a focus on the domains executive  
26 functioning, memory, speed of processing and language. We will use parallel versions of these  
27 tests to account for material-specific practice effects after repeated assessment.[37]  
28  
29

30 During hospitalisation, screening of delirium is standard of care. Confusion Assessment  
31 Method for the ICU (CAM-ICU) or Delirium Observation Screening scores (DOS) at the  
32 cardiothoracic ward will be performed three times a day. A dedicated senior delirium researcher  
33 or neurologist will validate the diagnosis of delirium, using *DSM V criteria for delirium*. [38]  
34  
35  
36

### 37 38 *Cardiac surgery*

39  
40 Perioperative care will be executed conform the standard of care protocols for CABG,  
41 minimizing confounders due to medical management.  
42  
43  
44  
45  
46  
47  
48  
49  
50  
51  
52  
53  
54  
55  
56  
57  
58  
59  
60

**Table 3. Summary of neuropsychological testing**

| <i>Neuropsychological assessments</i>                                    |                                                                  |
|--------------------------------------------------------------------------|------------------------------------------------------------------|
| <b>Test name</b>                                                         | <b>Assessment of</b>                                             |
| <b>At timepoints T0</b>                                                  |                                                                  |
| National Adult Reading Test – IQ[48]                                     | Estimation of pre-morbid intelligence level                      |
| <b>At timepoints T0, T4, T5, T6</b>                                      |                                                                  |
| Trail Making Test A&B[49, 50, 51]                                        | Visual attention and task switching                              |
| Stroop Colour-Word Test I, II, III[52]                                   | Susceptibility to interference                                   |
| Wechsler Adult Intelligence Scale-IV (WAIS) – Digit Span[53, 54]         | Working memory                                                   |
| Letter Digit Substitution Test (LDST)[55, 56]                            | Information processing speed                                     |
| Rey Auditory Verbal Learning Test (RAVLT)[57, 58]                        | Verbal episodic memory                                           |
| Rey/Taylor Complex Figure Test – copy and recall trials (RCFT)[59, 60]   | Visuoconstructive ability and visual episodic memory             |
| Rivermead Behavioural Memory Test-3 (RBMT-3), Face recognition[61]       | Visual episodic memory                                           |
| Letter Fluency Test (LFT)[62]                                            | Semantic memory and executive function                           |
| Token Test (short form)[63]                                              | Language comprehension                                           |
| <i>Neuropsychological questionnaires</i>                                 |                                                                  |
| <b>Test name</b>                                                         | <b>Assessment of</b>                                             |
| <b>At timepoints T0</b>                                                  |                                                                  |
| Informant Questionnaire on Cognitive Decline in the Elderly (IQCODE)[64] | Subjective cognitive impairment, filled out by significant other |
| <b>At timepoints T0, T4, T5, T6</b>                                      |                                                                  |
| Clinical Frailty Scale[65]                                               | Frailty screening                                                |
| RAND-36[66]                                                              | Health-related quality of life survey                            |
| Cognitive Failure Questionnaire (CFQ)[67]                                | Subjective cognitive complaints                                  |
| Hospital Anxiety and Depression Scale (HADS)[68]                         | Anxiety and depressive complaints                                |
| <b>At timepoints T4, T5, T6</b>                                          |                                                                  |
| Impact of Events Scale-Revised (IES-R)[69]                               | Distress caused by traumatic events                              |

### Data analysis

Pharmacokinetic modelling of dynamic PET data will be performed in PMOD software (PMOD Technologies LLC, Zürich, Switzerland). Binding potential ( $BP_{nd}$ ) and volume of distribution ( $V_T$ ) in several regions of interest (ROIs) will be determined using the 2-tissue compartmental model (2TCM) for each scan. Predefined ROIs include the frontal, temporal, parietal and occipital lobes, amygdala, hippocampus, thalamus, cerebellum and the brain stem.

For each patient,  $^{18}F$ -DPA-714  $BP_{nd}$  will be measured in the ROI for baseline and post-surgery PET scans. Since  $BP_{nd}$  is proportional to the availability of TSPO binding sites in the brain, an increase in  $BP_{nd}$  reflects an increase in glial activation. In addition, we will measure  $V_T$  which recently has been shown to mainly reflect changes in peripheral tracer binding during systemic inflammation, rather than changes in TSPO expression in the brain.[25][and unpublished data from our group] Therefore, both outcome measurements are required to validate these recent findings and assess glial activation accurately. Study investigators who analyse the cerebral imaging data will be blinded for inflammatory mediator results and cognitive outcomes.

1  
2  
3 No consensus about the definition of POCD has been achieved in the literature thus far.[5, 39,  
4 40] At all timepoints, neuropsychological tests of our patients will be compared to available  
5 normative data, adjusted for age and educational level, resulting in standardized z-scores.  
6 Domain scores will be calculated by averaging the z-scores of the individual tests within a  
7 specific domain. Calculation of test performance will be supervised by an experienced clinical  
8 neuropsychologist. Performance on each individual test will also be classified as being either  
9 within the normal range (0), below average (1) or impaired (2) compared to the aforementioned  
10 normative data. "Normal performance" is defined as performance above -1 SD from the  
11 normative mean. "Below average" as between -1 SD and -1.65 SD from the normative mean  
12 (the lowest 16% of the normal population), and "impaired" as below -1.65 SD from the  
13 normative mean (the lowest 5% of the normal population).[41, 42] Furthermore, performance  
14 on a cognitive domain as a whole can be calculated as the mean of test rates in each domain. A  
15 cognitive domain will be classified as impaired when the average rating of tests is >1. We will  
16 define the presence of POCD when patients are *newly* impaired in one or more domains at  
17 hospital discharge, or when the average test rating has declined in more than one domain  
18 compared to baseline. This way we can dichotomize our patients into two groups: with or  
19 without POCD at hospital discharge.  
20  
21  
22  
23

24 The percentage change in TSPO expression (postoperative versus preoperative) will be  
25 calculated and reported as mean  $\pm$  standard error of the mean (SEM) if normally distributed.  
26 This value can be compared using unpaired t-tests between both groups with Bonferroni post-  
27 hoc correction, and additionally, linear mixed models will be performed with the presence of  
28 POCD and brain region modelled as fixed effects, and subject ID as random effect. Multiple  
29 linear regression models will be used to study the relationship between tracer uptake and  
30 neuropsychological outcomes. Age, sex, Clinical Frailty Scale, Charlson Comorbidity Index,  
31 Hospital Anxiety and Depression Scale (HADS) and the RAND-36 item health survey at  
32 inclusion can be included as covariates. Multiple logistic regression analysis is performed to  
33 correct for possible confounders such as newly developed structural brain lesions on MRI.  
34  
35  
36

37 The trajectory of systemic inflammatory parameters and differences in timepoints will be  
38 measured with repeated measures one-way ANOVA or linear mixed models in case of missings.  
39 In addition, correlations between systemic inflammatory markers and TSPO expression will be  
40 studied using Pearson for parametric or Spearman for non-parametric data. Multiple linear  
41 regression can be applied to correct for possible confounding factors. Unpaired t-tests will be  
42 applied to compare TSPO expression between patients with and without a delirious episode  
43 during hospital admission.  
44  
45  
46

47 All MRI images will be evaluated without prior notice of any clinical parameter. White matter  
48 lesions are defined as hyperintense lesions on FLAIR MRI without corresponding cerebrospinal  
49 fluid like hypo-intense lesions on the T1 weighted image. Lacunar infarcts are defined as hypo-  
50 intense areas >2mm and  $\leq$ 15mm on FLAIR and T1.[43] Territorial infarcts are defined as  
51 hyperintense lesions on FLAIR, and hypointense lesions on T1 image.[43] And finally,  
52 microbleeds are defined as small, homogenous, round foci of low signal intensity on T2\*  
53 weighted images of <10mm in diameter.[44]

54 Analyses of functional and structural brain images will be performed using FSL (FMRIB's  
55 Software Library, Oxford, United Kingdom).[45] After pre-processing and denoising, subject-  
56 wise spatial maps of within network brain connectivity of the salience, executive control and  
57 default mode networks will be compared with non-parametric tests for mean differences.  
58 Vascular wall enhancement will be compared between the preoperative and postoperative  
59 assessments with paired t-tests or the Wilcoxon signed rank test if the data are non-parametric.  
60

1  
2  
3  
4 Descriptive statistics will be performed using IBM-SPSS software. Mean ( $\pm$ SEM) or median  
5 (IQR) will be presented depending on the distribution of the data. Alpha will be set at 0.05  
6 throughout.  
7

8 After the first 5 patients we will schedule a technical interim analysis to establish whether a  
9 tissue reference model is a reliable, non-invasive method for pharmacokinetic analysis of TSPO  
10 neuroimaging during systemic inflammation-induced neuroinflammation. If this or other  
11 (mathematical) methods can be reliably validated in our cohort, there will be no longer need for  
12 arterial blood sampling.  
13  
14

### 15 16 **Sample size calculation** 17

18 No data on the degree of glial activation after systemic inflammatory responses in post-cardiac  
19 surgery patients are available. Research on cognitive dysfunction after cardiac surgery estimates  
20 a prevalence of approximately 50% at hospital discharge.[1, 5, 39] Therefore, we will define  
21 two groups based on the presence or absence of cognitive dysfunction at hospital discharge.  
22  
23

24 Previous studies in dementia patients observed a 15-35% higher PET tracer uptake in patients  
25 with cognitive impairment compared to healthy controls, with a standard deviation of 30%.[46,  
26 47] Therefore, we assume that patients with cognitive dysfunction at hospital discharge after  
27 cardiac surgery will have a 30% higher delta tracer uptake compared to patients without  
28 cognitive decline. To assess a 30% higher delta tracer uptake in patients with cognitive  
29 dysfunction, an unpaired two-sample t-test results in 13 patients per group with a power of 80%  
30 and a one-sided alpha of 0.05. In order to account for lower increments we will include 15  
31 patients per group resulting in a power of 85% with an alpha of 0.05 to differentiate an increase  
32 of 30% in delta tracer uptake. Consequently, we will include a total of 30 patients, assuming  
33 that 50% will have cognitive decline at hospital discharge. The investigator can decide to  
34 withdraw a subject from the study for a) urgent medical reasons, or b) if a protocol violation  
35 occurs or c) if the subject is lost to follow-up. Replacement of individuals will not be necessary  
36 in this observational cohort once both PET scans are performed (i.e. primary objective has been  
37 met).  
38  
39  
40

41 Sample size calculations were conducted for the primary objective solely, considering cognitive  
42 decline at hospital discharge. Assessment of long-term cognitive outcomes (up to 6 months)  
43 together with assessment of our secondary outcomes has been set up in an exploratory setting.  
44 The data of this study will be important to calculate the power and feasibility of a subsequent  
45 prospective project focussed on long-term outcomes.  
46  
47  
48  
49

### 50 **Interim analysis with futility stop** 51

52 An interim analysis will be performed after the first 15 subjects to validate that CABG surgery  
53 indeed induces a neuroinflammatory response, which will be assessed by TSPO PET imaging.  
54 An independent data safety and monitoring board (DSMB), composed by two clinical experts  
55 in the field of nuclear medicine and neurology, and a biostatistician, will analyse whether  
56 increased PET tracer uptake is observed after CABG surgery compared to the preoperative  
57 baseline tracer uptake. If no trend towards a significant difference ( $p > 0.10$ ) will be observed,  
58 the inclusion will be stopped to prevent futility. Furthermore an adaptive power analysis will  
59 be performed by the unblinded statistician DSMB member during the interim analysis to  
60

1  
2  
3 determine whether the study is underpowered to fulfil the primary objective, and whether the  
4 sample size should be adapted. The pooled standard deviation (SD) of the delta PET tracer  
5 uptake will be calculated from the first 15 patients of which approximately 50% have cognitive  
6 disorders at hospital discharge. Using this pooled SD the sample size calculation will be  
7 performed again. If the ratio between this new sample size and the original is greater than 1, the  
8 sample size will be adapted if deemed feasible. The investigators will remain blinded for  
9 cognitive outcomes until the end of the study.  
10  
11

### 12 13 **Study period**

14  
15 The study started enrolling patients in March 2019. The estimated study enrolment completion  
16 date is anticipated in the beginning of 2022. Please note that this manuscript was finalised prior  
17 to the interim analyses.  
18  
19

### 20 21 22 23 **Ethics and dissemination**

24  
25 The study is conducted according to the principles of the Declaration of Helsinki and in  
26 accordance with the Dutch Medical Research Involving Human Subjects Act (WMO) and Good  
27 Clinical Practice guidelines. The study obtained ethical approval by the  
28 Medical Research Ethics Committee (MREC) region Arnhem-Nijmegen (CMO 2016-2598).  
29 The study is registered in the ClinicalTrials.gov database (NCT 04520802). The burden of the  
30 study protocol consists of two PET/CT-scans and two cerebral MRIs, additional blood sampling  
31 before, during and after surgery and four neuropsychological examinations, two during hospital  
32 admission and two follow-up visits during the first 6 months after hospital discharge.  
33  
34  
35

### 36 37 **Patient and public involvement statement**

38  
39 The hypothesis of this study was conceived with the help of patients through outpatient clinical  
40 follow-up after an ICU admission. Through patient experience of different long-term  
41 consequences, this study's endpoints involves cognitive performance, psychological symptoms  
42 and quality of life. A patient member of the MREC judged the study protocol for feasibility,  
43 burden and understandability of patient information.  
44  
45  
46

### 47 48 **Data management**

49  
50 Data will be handled confidentially and pseudonymously. Study data will be de-identified and  
51 a secured subject identification code list will be kept and stored separately from the data. This  
52 observational study uses an electronic remote data capture system. All missing and ambiguous  
53 data will be queried. The investigator will permit study-related monitoring, audits and  
54 regulatory inspection at their site, providing access to source data/documents. In all cases, it  
55 remains the responsibility of the investigator to ensure that data are accurate. Coded data will  
56 be kept after closure of the study and can only be used for ancillary studies after strict approval  
57 of the principal investigator. Anonymized data can be shared with other organizations for  
58 academic research, consensus development or other projects aimed at advancement of  
59 knowledge in this area. Body materials consisting of blood will be preserved in a coded form  
60

1  
2  
3 for 10 years for possible follow-up studies. The MREC will be consulted before body material  
4 is used for follow-up research.  
5  
6

### 7 **Public disclosure and publication policy**

8  
9 The results of this study will be published, regardless of whether these are positive, negative or  
10 inconclusive, in peer-reviewed international (open access) medical journals and presented at  
11 medical conferences. In addition, a summary of the results of this study will be published on  
12 the website of the funding agency The Netherlands Organization for Health Research and  
13 Development (ZonMw).  
14  
15

### 16 **Relevance of findings**

17  
18 Cerebral dysfunction after cardiac surgery occurs frequently and may severely affect patients'  
19 daily lives. Due to the lack of research data within this area, the pathophysiology of cerebral  
20 dysfunction post-surgery is unknown. Therefore, there are currently no interventions available  
21 to prevent or treat this deterioration. The FOCUS study will quantify glial activation, which is  
22 suggested to be important in this pathophysiology, and relate this to cognition, structural and  
23 functional changes to the brain and systemic inflammation. This study combines state of the art  
24 molecular and MR neuroimaging techniques, elaborates longitudinal neuropsychological  
25 examinations, and comprehensive immunological laboratory tests. Objective neurocognitive  
26 examinations will be performed at four different timepoints, up to six months postoperatively,  
27 enabling us to detect even subtle changes in cognition. Better understanding of the pathogenesis  
28 of POCD could direct neuroscientists towards the development of targets for future  
29 interventions. This imaging paradigm could provide an approach to examine the efficacy of  
30 such interventions in clinical studies.  
31  
32  
33  
34

35  
36 In addition, the knowledge obtained with this study is of importance for patients and healthcare  
37 professionals as well. The participating patient will not directly benefit from study participation.  
38 However, they will be followed with regard to possible complaints in light of potential post-  
39 cardiac surgery cerebral dysfunction. This will increase the awareness of the participating  
40 patients and caregivers with respect to such complaints. This might benefit the patient and  
41 caregivers as it will decrease uncertainty about the nature of the complaints when they occur.  
42 Furthermore this study searches for a biological explanation for post-surgery cerebral  
43 complaints which are often not understood or classified as functional.  
44  
45

46  
47 Several limitations need to be addressed. First, as this study is powered at cognitive decline at  
48 hospital discharge, it is not powered to study the association between glial activation and  
49 cognitive decline after 6 months. The second limitation concerns the arterial sampling during  
50 the dynamic PET-scans. Automated arterial sampling, which is frequently used in other studies  
51 using outpatient clinic patients, leads to a loss of 200-300 ml of blood per scan. Loss of such  
52 an amount of blood in cardiac surgery patients is not preferable as it could result in a significant  
53 health risk for these critically ill patients. Therefore we will sample manually, which reduces  
54 blood volume loss. Manual sampling results in less sampling points and could therefore lead to  
55 a slightly less accurate plasma activity curve.  
56  
57

58  
59 Imaging neuroinflammation as proposed is safe, as corroborated by existing human and animal  
60 data. In addition, imaging neuroinflammation could lead to potential prognostic and  
interventional targets that could revolutionize healthcare for this large group of patients.

## References

- 1 Greaves D, Psaltis PJ, Ross TJ, et al. Cognitive outcomes following coronary artery bypass grafting: A systematic review and meta-analysis of 91,829 patients. *Int J Cardiol* 2019;289:43-49 doi: 10.1016/j.ijcard.2019.04.065 [published Online First: 2019/05/13]
- 2 Berger M, Terrando N, Smith SK, et al. Neurocognitive function after cardiac surgery: From phenotypes to mechanisms. *Anesthesiology* 2018;129(4):829-51 doi: 10.1097/aln.0000000000002194 [published Online First: 2018/04/06]
- 3 Brown CHt, Probert J, Healy R, et al. Cognitive decline after delirium in patients undergoing cardiac surgery. *Anesthesiology* 2018;129(3):406-16 doi: 10.1097/aln.0000000000002253 [published Online First: 2018/05/18]
- 4 Sauer AC, Veldhuijzen DS, Ottens TH, et al. Association between delirium and cognitive change after cardiac surgery. *Br J Anaesth* 2017;119(2):308-15 doi: 10.1093/bja/aex053 [published Online First: 2017/09/01]
- 5 Bruce K, Smith JA, Yelland G, et al. The impact of cardiac surgery on cognition. *Stress and Health* 2008;24(3):249-66 doi: 10.1002/smi.1204
- 6 Lee TA, Wolozin B, Weiss KB, et al. Assessment of the emergence of alzheimer's disease following coronary artery bypass graft surgery or percutaneous transluminal coronary angioplasty. *Journal of Alzheimer's Disease* 2005;7(4):319-24 doi: 10.3233/JAD-2005-7408
- 7 Wan Y, Xu J, Ma D, et al. Postoperative impairment of cognitive function in rats: A possible role for cytokine-mediated inflammation in the hippocampus. *Anesthesiology* 2007;106(3):436-43 doi: 10.1097/00000542-200703000-00007 [published Online First: 2007/02/28]
- 8 Cibelli M, Fidalgo AR, Terrando N, et al. Role of interleukin-1beta in postoperative cognitive dysfunction. *Ann Neurol* 2010;68(3):360-8 doi: 10.1002/ana.22082 [published Online First: 2010/09/08]
- 9 Cao XZ, Ma H, Wang JK, et al. Postoperative cognitive deficits and neuroinflammation in the hippocampus triggered by surgical trauma are exacerbated in aged rats. *Prog Neuropsychopharmacol Biol Psychiatry* 2010;34(8):1426-32 doi: 10.1016/j.pnpbp.2010.07.027 [published Online First: 2010/08/10]
- 10 Banks WA. Blood-brain barrier transport of cytokines: A mechanism for neuropathology. *Curr Pharm Des* 2005;11(8):973-84 doi: 10.2174/1381612053381684 [published Online First: 2005/03/22]
- 11 Varatharaj A, Galea I. The blood-brain barrier in systemic inflammation. *Brain, Behavior, and Immunity* 2017;60:1-12 doi: 10.1016/j.bbi.2016.03.010
- 12 Perry VH, Holmes C. Microglial priming in neurodegenerative disease. *Nat Rev Neurol* 2014;10(4):217-24 doi: 10.1038/nrneurol.2014.38 [published Online First: 2014/03/19]
- 13 Wendeln AC, Degenhardt K, Kaurani L, et al. Innate immune memory in the brain shapes neurological disease hallmarks. *Nature* 2018;556(7701):332-38 doi: 10.1038/s41586-018-0023-4 [published Online First: 2018/04/13]
- 14 Dheen ST, Kaur C, Ling EA. Microglial activation and its implications in the brain diseases. *Curr Med Chem* 2007;14(11):1189-97 doi: 10.2174/092986707780597961 [published Online First: 2007/05/17]
- 15 Streit WJ, Mrak RE, Griffin WS. Microglia and neuroinflammation: A pathological perspective. *J Neuroinflammation* 2004;1(1):14 doi: 10.1186/1742-2094-1-14 [published Online First: 2004/08/03]
- 16 Turkheimer FE, Rizzo G, Bloomfield PS, et al. The methodology of tspos imaging with positron emission tomography. *Biochem Soc Trans* 2015;43(4):586-92 doi: 10.1042/bst20150058 [published Online First: 2015/11/10]
- 17 Song YS. Perspectives in tspos pet imaging for neurologic diseases. *Nucl Med Mol Imaging* 2019;53(6):382-85 doi: 10.1007/s13139-019-00620-y [published Online First: 2019/12/24]
- 18 Casellas P. Peripheral benzodiazepine receptors and mitochondrial function. *Neurochemistry International* 2002;40(6):475-86 doi: 10.1016/s0197-0186(01)00118-8
- 19 Lee Y, Park Y, Nam H, et al. Translocator protein (tspos): The new story of the old protein in neuroinflammation. *BMB Rep* 2020;53(1):20-27 [published Online First: 2019/12/11]



- 1  
2  
3 20 Bradburn S, Murgatroyd C, Ray N. Neuroinflammation in mild cognitive impairment and  
4 alzheimer's disease: A meta-analysis. *Ageing Res Rev* 2019;50:1-8 doi:  
5 10.1016/j.arr.2019.01.002 [published Online First: 2019/01/06]  
6  
7 21 Plavén-Sigray P, Matheson GJ, Collste K, et al. Positron emission tomography studies of the glial  
8 cell marker translocator protein in patients with psychosis: A meta-analysis using individual  
9 participant data. *Biol Psychiatry* 2018;84(6):433-42 doi: 10.1016/j.biopsych.2018.02.1171  
10 [published Online First: 2018/04/15]  
11  
12 22 Enache D, Pariante CM, Mondelli V. Markers of central inflammation in major depressive  
13 disorder: A systematic review and meta-analysis of studies examining cerebrospinal fluid,  
14 positron emission tomography and post-mortem brain tissue. *Brain Behav Immun* 2019;81:24-  
15 40 doi: 10.1016/j.bbi.2019.06.015 [published Online First: 2019/06/14]  
16  
17 23 Sandiego CM, Gallezot JD, Pittman B, et al. Imaging robust microglial activation after  
18 lipopolysaccharide administration in humans with pet. *Proc Natl Acad Sci U S A*  
19 2015;112(40):12468-73 doi: 10.1073/pnas.1511003112 [published Online First: 2015/09/20]  
20  
21 24 Forsberg A, Cervenka S, Jonsson Fagerlund M, et al. The immune response of the human brain to  
22 abdominal surgery. *Ann Neurol* 2017;81(4):572-82 doi: 10.1002/ana.24909 [published Online  
23 First: 2017/03/03]  
24  
25 25 Nettis MA, Veronese M, Nikkheslat N, et al. Pet imaging shows no changes in tspo brain density  
26 after ifn-alpha immune challenge in healthy human volunteers. *Transl Psychiatry*  
27 2020;10(1):89 doi: 10.1038/s41398-020-0768-z [published Online First: 2020/03/11]  
28  
29 26 Newman MF, Kirchner JL, Phillips-Bute B, et al. Longitudinal assessment of neurocognitive  
30 function after coronary-artery bypass surgery. *N Engl J Med* 2001;344(6):395-402 doi:  
31 10.1056/nejm200102083440601 [published Online First: 2001/02/15]  
32  
33 27 Glumac S, Kardum G, Karanovic N. Postoperative cognitive decline after cardiac surgery: A  
34 narrative review of current knowledge in 2019. *Med Sci Monit* 2019;25:3262-70 doi:  
35 10.12659/msm.914435 [published Online First: 2019/05/03]  
36  
37 28 Norden DM, Godbout JP. Review: Microglia of the aged brain: Primed to be activated and resistant  
38 to regulation. *Neuropathol Appl Neurobiol* 2013;39(1):19-34 doi: 10.1111/j.1365-  
39 2990.2012.01306.x [published Online First: 2012/10/09]  
40  
41 29 Owen DR, Yeo AJ, Gunn RN, et al. An 18-kda translocator protein (tspo) polymorphism explains  
42 differences in binding affinity of the pet radioligand pbr28. *J Cereb Blood Flow Metab*  
43 2012;32(1):1-5 doi: 10.1038/jcbfm.2011.147 [published Online First: 2011/10/20]  
44  
45 30 Charlson ME, Pompei P, Ales KL, et al. A new method of classifying prognostic comorbidity in  
46 longitudinal studies: Development and validation. *J Chronic Dis* 1987;40(5):373-83 doi:  
47 10.1016/0021-9681(87)90171-8 [published Online First: 1987/01/01]  
48  
49 31 Quan H, Li B, Couris CM, et al. Updating and validating the charlson comorbidity index and score  
50 for risk adjustment in hospital discharge abstracts using data from 6 countries. *Am J Epidemiol*  
51 2011;173(6):676-82 doi: 10.1093/aje/kwq433 [published Online First: 2011/02/19]  
52  
53 32 Hermans EJ, Henckens MJ, Joëls M, et al. Dynamic adaptation of large-scale brain networks in  
54 response to acute stressors. *Trends Neurosci* 2014;37(6):304-14 doi:  
55 10.1016/j.tins.2014.03.006 [published Online First: 2014/04/29]  
56  
57 33 Kohn N, Hermans EJ, Fernández G. Cognitive benefit and cost of acute stress is differentially  
58 modulated by individual brain state. *Soc Cogn Affect Neurosci* 2017;12(7):1179-87 doi:  
59 10.1093/scan/nsx043 [published Online First: 2017/04/13]  
60  
61 34 Hoedemaekers C, van Deuren M, Sprong T, et al. The complement system is activated in a biphasic  
62 pattern after coronary artery bypass grafting. *Ann Thorac Surg* 2010;89(3):710-6 doi:  
63 10.1016/j.athoracsur.2009.11.049 [published Online First: 2010/02/23]  
64  
65 35 Hoedemaekers CW, Pickkers P, Netea MG, et al. Intensive insulin therapy does not alter the  
66 inflammatory response in patients undergoing coronary artery bypass grafting: A randomized  
67 controlled trial [isrctn95608630]. *Crit Care* 2005;9(6):R790-7 doi: 10.1186/cc3911 [published  
68 Online First: 2005/12/17]  
69  
70 36 Murkin JM, Newman SP, Stump DA, et al. Statement of consensus on assessment of  
71 neurobehavioral outcomes after cardiac surgery. *Ann Thorac Surg* 1995;59(5):1289-95 doi:  
72 10.1016/0003-4975(95)00106-u [published Online First: 1995/05/01]

- 1  
2  
3 37 Beglinger LJ, Gaydos B, Tangphao-Daniels O, et al. Practice effects and the use of alternate forms  
4 in serial neuropsychological testing. *Arch Clin Neuropsychol* 2005;20(4):517-29 doi:  
5 10.1016/j.acn.2004.12.003 [published Online First: 2005/05/18]
- 6 38 American Psychiatric Association. Diagnostic and statistical manual of mental disorders, 5th  
7 edition. Arlington, VA. 2013.
- 8 39 Rudolph JL, Schreiber KA, Culley DJ, et al. Measurement of post-operative cognitive dysfunction  
9 after cardiac surgery: A systematic review. *Acta Anaesthesiol Scand* 2010;54(6):663-77 doi:  
10 10.1111/j.1399-6576.2010.02236.x [published Online First: 2010/04/20]
- 11 40 Needham MJ, Webb CE, Bryden DC. Postoperative cognitive dysfunction and dementia: What we  
12 need to know and do. *Br J Anaesth* 2017;119(suppl\_1):i115-i25 doi: 10.1093/bja/aex354  
13 [published Online First: 2017/11/22]
- 14 41 van den Berg E, Kessels RPC, de Haan EHF, et al. Mild impairments in cognition in patients with  
15 type 2 diabetes mellitus: The use of the concepts mci and cind. *Journal of Neurology,*  
16 *Neurosurgery & Psychiatry* 2005;76(10):1466-67 doi: 10.1136/jnnp.2005.062737
- 17 42 Reukers DFM, Aaronson J, van Loenhout JAF, et al. Objective cognitive performance and  
18 subjective complaints in patients with chronic q fever or q fever fatigue syndrome. *BMC*  
19 *Infectious Diseases* 2020;20(1):397 doi: 10.1186/s12879-020-05118-z
- 20 43 Hervé D, Mangin JF, Molko N, et al. Shape and volume of lacunar infarcts: A 3d mri study in  
21 cerebral autosomal dominant arteriopathy with subcortical infarcts and leukoencephalopathy.  
22 *Stroke* 2005;36(11):2384-8 doi: 10.1161/01.Str.0000185678.26296.38 [published Online First:  
23 2005/10/15]
- 24 44 Ashburner J, Friston KJ. Unified segmentation. *Neuroimage* 2005;26(3):839-51 doi:  
25 10.1016/j.neuroimage.2005.02.018 [published Online First: 2005/06/16]
- 26 45 Jenkinson M, Beckmann CF, Behrens TE, et al. Fsl. *Neuroimage* 2012;62(2):782-90 doi:  
27 10.1016/j.neuroimage.2011.09.015 [published Online First: 2011/10/08]
- 28 46 Suridjan I, Pollock BG, Verhoeff NP, et al. In-vivo imaging of grey and white matter  
29 neuroinflammation in alzheimer's disease: A positron emission tomography study with a novel  
30 radioligand, [18f]-feppa. *Mol Psychiatry* 2015;20(12):1579-87 doi: 10.1038/mp.2015.1  
31 [published Online First: 2015/02/25]
- 32 47 Varrone A, Oikonen V, Forsberg A, et al. Positron emission tomography imaging of the 18-kda  
33 translocator protein (tspo) with [18f]fempa in alzheimer's disease patients and control subjects.  
34 *Eur J Nucl Med Mol Imaging* 2015;42(3):438-46 doi: 10.1007/s00259-014-2955-8 [published  
35 Online First: 2014/11/22]
- 36 48 Nelson HE, O'Connell A. Dementia: The estimation of premorbid intelligence levels using the new  
37 adult reading test. *Cortex* 1978;14(2):234-44 doi: 10.1016/s0010-9452(78)80049-5 [published  
38 Online First: 1978/06/01]
- 39 49 Partington JE, Leiter RG. Partington's pathways test. *Psychological Service Center Journal*  
40 1949;1:11-20
- 41 50 Reitan RM, Wolfson D. The halstead-reitan neuropsychological test battery. Tuscon, AZ:  
42 Neuropsychological Press 1985.
- 43 51 Larrabee GJ, Millis SR, Meyers JE. Sensitivity to brain dysfunction of the halstead-reitan vs an  
44 ability-focused neuropsychological battery. *The Clinical Neuropsychologist* 2008;22(5):813-25  
45 doi: 10.1080/13854040701625846
- 46 52 Stroop JR. Studies of interference in serial verbal reactions. *Journal of Experimental Psychology*  
47 1935;18(6):643-62 doi: 10.1037/h0054651
- 48 53 Wechsler D. Wechsler adult intelligence scale-fourth edition-nederlandse bewerking. Technische  
49 handleiding en afname en scorehandleiding. Amsterdam: Pearson Assessment and Information  
50 BV 2012.
- 51 54 Kessels RPC, Molleman PW, Oosterman JM. Assessment of working-memory deficits in patients  
52 with mild cognitive impairment and alzheimer's dementia using Wechsler's working memory  
53 index. *Aging Clinical and Experimental Research* 2011;23(5):487-90 doi:  
54 10.1007/BF03325245
- 55 55 Natu MV, Agarwal AK. Digit letter substitution test (dlst) as an alternative to digit symbol  
56 substitution test (dsst). *Human Psychopharmacology: Clinical and Experimental*  
57 1995;10(4):339-43 doi: 10.1002/hup.470100414
- 58  
59  
60

- 1  
2  
3 56 Jolles J, Houx PJ, Van Boxtel MPJ, et al. The maastricht aging study: Determinants of cognitive  
4 aging. Maastricht: Neuropsych Publishers 1995.  
5 57 Schmidt M. Rey auditory verbal learning test: Ravlt : A handbook: Western Psychological Services  
6 1996.  
7 58 Saan RJ, Deelman BG. De 15-woordentest a en b. Groningen: Afdeling Neuropsychologie, AZG  
8 1986.  
9 59 Rey A. Psychological examination of traumatic encephalopathy. *Clinical Neuropsychologist*  
10 1993;7(1):3-21 doi: 10.1080/13854049308401883  
11 60 Meyers JE, Meyers KR. Rey complex figure test and recognition trial: Professional manual. Odessa:  
12 Psychological Assessment Resources 1995.  
13 61 Wilson B, Cockburn J, Baddeley A. The rivermead behavioural memory test manual. . Bury St  
14 Edmunds: Thames Valley Test Co 1985.  
15 62 Mulder JL, Dekker PH, Dekker R. Word-fluency test/figure-fluency test (wft/fft). Leiden: PITS  
16 Uitgeverij BV 2006.  
17 63 De Renzi E, Faglioni P. Normative data and screening power of a shortened version of the token test.  
18 *Cortex* 1978;14(1):41-9 doi: 10.1016/s0010-9452(78)80006-9 [published Online First:  
19 1978/03/01]  
20 64 Jorm AF, Jacomb PA. The informant questionnaire on cognitive decline in the elderly (iqcode):  
21 Socio-demographic correlates, reliability, validity and some norms. *Psychol Med*  
22 1989;19(4):1015-22 doi: 10.1017/s0033291700005742 [published Online First: 1989/11/01]  
23 65 Rockwood K, Song X, MacKnight C, et al. A global clinical measure of fitness and frailty in elderly  
24 people. *Cmaj* 2005;173(5):489-95 doi: 10.1503/cmaj.050051 [published Online First:  
25 2005/09/01]  
26 66 Hays RD, Sherbourne CD, Mazel RM. The rand 36-item health survey 1.0. *Health Econ*  
27 1993;2(3):217-27 doi: 10.1002/hec.4730020305 [published Online First: 1993/10/01]  
28 67 Broadbent DE, Cooper PF, FitzGerald P, et al. The cognitive failures questionnaire (cfq) and its  
29 correlates. *Br J Clin Psychol* 1982;21(1):1-16 doi: 10.1111/j.2044-8260.1982.tb01421.x  
30 [published Online First: 1982/02/01]  
31 68 Spinhoven P, Ormel J, Sloekers PP, et al. A validation study of the hospital anxiety and depression  
32 scale (hads) in different groups of dutch subjects. *Psychol Med* 1997;27(2):363-70 doi:  
33 10.1017/s0033291796004382 [published Online First: 1997/03/01]  
34 69 Creamer M, Bell R, Failla S. Psychometric properties of the impact of event scale - revised. *Behav*  
35 *Res Ther* 2003;41(12):1489-96 doi: 10.1016/j.brat.2003.07.010 [published Online First:  
36 2004/01/07]  
37  
38  
39  
40  
41  
42  
43  
44  
45  
46  
47  
48  
49  
50  
51  
52  
53  
54  
55  
56  
57  
58  
59  
60

### **Acknowledgements:**

The authors are very grateful for the help of our colleagues at the department of Radiology and Nuclear Medicine, especially Gerben Franssen, Desirée Bos, Peter Laverman, Jurrian Butter, Peter Kok, Maichel van Riel, Michel de Groot, Marijke Hogenkamp and Judith Thijssen. In addition, we wish to thank Petra Budde, Jacqueline Blaauwbroek and Tanja Derks from the cardiothoracic planning office, for their help and flexibility in scheduling study patients. Assistance provided by the psychologists Chiara Fasotti, Claudette van Roij, Maud van Dorst and Lizzy van der Horst in performing the neuropsychological examinations was greatly appreciated. Furthermore we wish to thank Jelle Gerretsen and Matthijs Kox from the Intensive Care Research Unit for their input in the immunological assays in this study. Finally, this study could not be conducted without the help of the cardiothoracic surgeons, anaesthesiologists, intensivists and ICU nurses.

### **Contributors:**

WFA conceived the study idea. APvT and WFA developed the study design to which JvT, WL, HJD, NPR, FdL, FJAM, RPCK, NK, JvdH, PP and MR contributed. APvT and HBD drafted the manuscript. All authors were involved in the editing of the manuscript and read and approved the final manuscript.

### **Funding:**

WFA and this study were supported by a research grant from the Netherlands Organization for Health Research and Development (ZonMW Clinical Fellowship grant 90715610). This funding agency had no role in the concept, design or writing of this study.

**Competing interests:** None declared.

## Supplemental material to:

A.M. Peters van Ton et al.,  
*Neuroinflammation in cognitive decline post-cardiac surgery  
 (the FOCUS study): an observational study protocol*

### Appendix 1: MRI scan protocol – parameter settings

|                                                                     | Protocol Name | Sequence/Contrast parameters                                      | Resolution(mm)<br>Matrix Size<br>Parallel Imaging | Duration (min:secs) |
|---------------------------------------------------------------------|---------------|-------------------------------------------------------------------|---------------------------------------------------|---------------------|
| <b>T1-weighted MPRAGE</b>                                           | MPRAGE        | TR/TI/TE=2300/900/2.32ms<br>Flip angle=8°                         | 0.9x0.9x0.9mm<br>240x240x192<br>iPAT=2            | 5:21                |
| <b>T2-weighted TSE TRA</b>                                          | T2_tse_tra    | TR/TE=3500/92 ms<br>Flip angle = 120 °                            | 0.4x0.4x5mm<br>230x173x154                        | 2:01                |
| <b>Susceptibility weighted</b>                                      | F13D_SWI      | TR/TE=27/20ms<br>Flip angle = 15°                                 | 1x1x3mm<br>250x188x156<br>iPAT=2                  | 2:43                |
| <b>FLAIR</b>                                                        | T2_flair      | TR/TI/TE=9000/87/2500ms<br>Flip angle=150°                        | 0.6x0.6x5mm<br>230x173x143                        | 4:32                |
| <b>Fieldmap</b>                                                     | Gre_field     | TR/TE1/TE2=400/5.19/7.65<br>Flip angle= 60°                       | 3.8x3.8x3mm<br>240x240x135                        | 0:54                |
| <b>DTI</b>                                                          | MDDW64        | TR/TE=6900/67<br>Directions=108<br>b-value=1000 s/mm <sup>2</sup> | 2x2x2mm<br>240x240x128<br>iPAT=2                  | 12:47               |
| <b>fMRI</b>                                                         | Ep2d          | TR/TE=2390/30ms<br>Flip angle= 90°                                | 3.5x3.5x3.5<br>224x224x144                        | 6:06                |
| <b>TOF MR angiogram</b>                                             | ToF           | TR/TE=24/3.93ms<br>Flip angle= 15°                                | 0.5x0.5x0.6mm<br>200x150x154<br>iPAT=2            | 11:10               |
| <b>T1-weighted SPACE</b><br><i>pre-contrast &amp; post-contrast</i> | Tse3d_spc     | TR/TE=750/20ms                                                    | 0.5x0.5x0.9mm<br>231x231x51<br>iPAT=2             | 2x 3:49             |

# Reporting checklist for cohort study.

Based on the STROBE cohort guidelines.

## Instructions to authors

Complete this checklist by entering the page numbers from your manuscript where readers will find each of the items listed below.

Your article may not currently address all the items on the checklist. Please modify your text to include the missing information. If you are certain that an item does not apply, please write "n/a" and provide a short explanation.

Upload your completed checklist as an extra file when you submit to a journal.

In your methods section, say that you used the STROBE cohort reporting guidelines, and cite them as:

von Elm E, Altman DG, Egger M, Pocock SJ, Gøtzsche PC, Vandenbroucke JP. The Strengthening the Reporting of Observational Studies in Epidemiology (STROBE) Statement: guidelines for reporting observational studies.

|                           |                     | Reporting Item                                                                                  | Page Number |
|---------------------------|---------------------|-------------------------------------------------------------------------------------------------|-------------|
| <b>Title and abstract</b> |                     |                                                                                                 |             |
| Title                     | <a href="#">#1a</a> | Indicate the study's design with a commonly used term in the title or the abstract              | 1           |
| Abstract                  | <a href="#">#1b</a> | Provide in the abstract an informative and balanced summary of what was done and what was found | 2           |
| <b>Introduction</b>       |                     |                                                                                                 |             |
| Background / rationale    | <a href="#">#2</a>  | Explain the scientific background and rationale for the investigation being reported            | 3           |
| Objectives                | <a href="#">#3</a>  | State specific objectives, including any prespecified hypotheses                                | 4           |
| <b>Methods</b>            |                     |                                                                                                 |             |

|    |                      |                      |                                                                 |      |
|----|----------------------|----------------------|-----------------------------------------------------------------|------|
| 1  | Study design         | <a href="#">#4</a>   | Present key elements of study design early in the paper         | 4    |
| 2  |                      |                      |                                                                 |      |
| 3  | Setting              | <a href="#">#5</a>   | Describe the setting, locations, and relevant dates, including  | 4-11 |
| 4  |                      |                      | periods of recruitment, exposure, follow-up, and data           |      |
| 5  |                      |                      | collection                                                      |      |
| 6  |                      |                      |                                                                 |      |
| 7  |                      |                      |                                                                 |      |
| 8  | Eligibility criteria | <a href="#">#6a</a>  | Give the eligibility criteria, and the sources and methods of   | 4-5  |
| 9  |                      |                      | selection of participants. Describe methods of follow-up.       |      |
| 10 |                      |                      |                                                                 |      |
| 11 | Eligibility criteria | <a href="#">#6b</a>  | For matched studies, give matching criteria and number of       | NA   |
| 12 |                      |                      | exposed and unexposed                                           |      |
| 13 |                      |                      |                                                                 |      |
| 14 |                      |                      |                                                                 |      |
| 15 |                      |                      |                                                                 |      |
| 16 | Variables            | <a href="#">#7</a>   | Clearly define all outcomes, exposures, predictors, potential   | 4-11 |
| 17 |                      |                      | confounders, and effect modifiers. Give diagnostic criteria, if |      |
| 18 |                      |                      | applicable                                                      |      |
| 19 |                      |                      |                                                                 |      |
| 20 |                      |                      |                                                                 |      |
| 21 | Data sources /       | <a href="#">#8</a>   | For each variable of interest give sources of data and details  | 6-7  |
| 22 | measurement          |                      | of methods of assessment (measurement). Describe                |      |
| 23 |                      |                      | comparability of assessment methods if there is more than       |      |
| 24 |                      |                      | one group. Give information separately for for exposed and      |      |
| 25 |                      |                      | unexposed groups if applicable.                                 |      |
| 26 |                      |                      |                                                                 |      |
| 27 |                      |                      |                                                                 |      |
| 28 |                      |                      |                                                                 |      |
| 29 |                      |                      |                                                                 |      |
| 30 | Bias                 | <a href="#">#9</a>   | Describe any efforts to address potential sources of bias       | 4    |
| 31 |                      |                      |                                                                 |      |
| 32 | Study size           | <a href="#">#10</a>  | Explain how the study size was arrived at                       | 10   |
| 33 |                      |                      |                                                                 |      |
| 34 | Quantitative         | <a href="#">#11</a>  | Explain how quantitative variables were handled in the          | 9    |
| 35 | variables            |                      | analyses. If applicable, describe which groupings were          |      |
| 36 |                      |                      | chosen, and why                                                 |      |
| 37 |                      |                      |                                                                 |      |
| 38 |                      |                      |                                                                 |      |
| 39 |                      |                      |                                                                 |      |
| 40 | Statistical          | <a href="#">#12a</a> | Describe all statistical methods, including those used to       | 8-10 |
| 41 | methods              |                      | control for confounding                                         |      |
| 42 |                      |                      |                                                                 |      |
| 43 | Statistical          | <a href="#">#12b</a> | Describe any methods used to examine subgroups and              | 8-10 |
| 44 | methods              |                      | interactions                                                    |      |
| 45 |                      |                      |                                                                 |      |
| 46 |                      |                      |                                                                 |      |
| 47 | Statistical          | <a href="#">#12c</a> | Explain how missing data were addressed                         | 8-10 |
| 48 | methods              |                      |                                                                 |      |
| 49 |                      |                      |                                                                 |      |
| 50 |                      |                      |                                                                 |      |
| 51 | Statistical          | <a href="#">#12d</a> | If applicable, explain how loss to follow-up was addressed      | 10   |
| 52 | methods              |                      |                                                                 |      |
| 53 |                      |                      |                                                                 |      |
| 54 |                      |                      |                                                                 |      |
| 55 | Statistical          | <a href="#">#12e</a> | Describe any sensitivity analyses                               | NA   |
| 56 | methods              |                      |                                                                 |      |
| 57 |                      |                      |                                                                 |      |
| 58 |                      |                      |                                                                 |      |
| 59 |                      |                      |                                                                 |      |
| 60 |                      |                      |                                                                 |      |

## Results

|    |                  |                      |                                                                   |
|----|------------------|----------------------|-------------------------------------------------------------------|
| 1  |                  |                      |                                                                   |
| 2  |                  |                      |                                                                   |
| 3  | Participants     | <a href="#">#13a</a> | Report numbers of individuals at each stage of study—eg           |
| 4  |                  |                      | numbers potentially eligible, examined for eligibility,           |
| 5  |                  |                      | confirmed eligible, included in the study, completing follow-     |
| 6  |                  |                      | up, and analysed. Give information separately for for             |
| 7  |                  |                      | exposed and unexposed groups if applicable.                       |
| 8  |                  |                      |                                                                   |
| 9  |                  |                      |                                                                   |
| 10 |                  |                      |                                                                   |
| 11 | Participants     | <a href="#">#13b</a> | Give reasons for non-participation at each stage                  |
| 12 |                  |                      |                                                                   |
| 13 | Participants     | <a href="#">#13c</a> | Consider use of a flow diagram                                    |
| 14 |                  |                      |                                                                   |
| 15 |                  |                      |                                                                   |
| 16 | Descriptive data | <a href="#">#14a</a> | Give characteristics of study participants (eg demographic,       |
| 17 |                  |                      | clinical, social) and information on exposures and potential      |
| 18 |                  |                      | confounders. Give information separately for exposed and          |
| 19 |                  |                      | unexposed groups if applicable.                                   |
| 20 |                  |                      |                                                                   |
| 21 |                  |                      |                                                                   |
| 22 |                  |                      |                                                                   |
| 23 | Descriptive data | <a href="#">#14b</a> | Indicate number of participants with missing data for each        |
| 24 |                  |                      | variable of interest                                              |
| 25 |                  |                      |                                                                   |
| 26 |                  |                      |                                                                   |
| 27 | Descriptive data | <a href="#">#14c</a> | Summarise follow-up time (eg, average and total amount)           |
| 28 |                  |                      |                                                                   |
| 29 | Outcome data     | <a href="#">#15</a>  | Report numbers of outcome events or summary measures              |
| 30 |                  |                      | over time. Give information separately for exposed and            |
| 31 |                  |                      | unexposed groups if applicable.                                   |
| 32 |                  |                      |                                                                   |
| 33 |                  |                      |                                                                   |
| 34 | Main results     | <a href="#">#16a</a> | Give unadjusted estimates and, if applicable, confounder-         |
| 35 |                  |                      | adjusted estimates and their precision (eg, 95% confidence        |
| 36 |                  |                      | interval). Make clear which confounders were adjusted for         |
| 37 |                  |                      | and why they were included                                        |
| 38 |                  |                      |                                                                   |
| 39 |                  |                      |                                                                   |
| 40 |                  |                      |                                                                   |
| 41 | Main results     | <a href="#">#16b</a> | Report category boundaries when continuous variables were         |
| 42 |                  |                      | categorized                                                       |
| 43 |                  |                      |                                                                   |
| 44 |                  |                      |                                                                   |
| 45 | Main results     | <a href="#">#16c</a> | If relevant, consider translating estimates of relative risk into |
| 46 |                  |                      | absolute risk for a meaningful time period                        |
| 47 |                  |                      |                                                                   |
| 48 |                  |                      |                                                                   |
| 49 | Other analyses   | <a href="#">#17</a>  | Report other analyses done—e.g., analyses of subgroups            |
| 50 |                  |                      | and interactions, and sensitivity analyses                        |
| 51 |                  |                      |                                                                   |
| 52 |                  |                      |                                                                   |

## Discussion

|    |             |                     |                                                          |
|----|-------------|---------------------|----------------------------------------------------------|
| 53 |             |                     |                                                          |
| 54 |             |                     |                                                          |
| 55 | Key results | <a href="#">#18</a> | Summarise key results with reference to study objectives |
| 56 |             |                     |                                                          |
| 57 |             |                     |                                                          |
| 58 |             |                     |                                                          |
| 59 |             |                     |                                                          |
| 60 |             |                     |                                                          |



|    |                    |                     |                                                                |    |
|----|--------------------|---------------------|----------------------------------------------------------------|----|
| 1  | Limitations        | <a href="#">#19</a> | Discuss limitations of the study, taking into account sources  | 12 |
| 2  |                    |                     | of potential bias or imprecision. Discuss both direction and   |    |
| 3  |                    |                     | magnitude of any potential bias.                               |    |
| 4  |                    |                     |                                                                |    |
| 5  |                    |                     |                                                                |    |
| 6  | Interpretation     | <a href="#">#20</a> | Give a cautious overall interpretation considering objectives, | 12 |
| 7  |                    |                     | limitations, multiplicity of analyses, results from similar    |    |
| 8  |                    |                     | studies, and other relevant evidence.                          |    |
| 9  |                    |                     |                                                                |    |
| 10 |                    |                     |                                                                |    |
| 11 | Generalisability   | <a href="#">#21</a> | Discuss the generalisability (external validity) of the study  | 12 |
| 12 |                    |                     | results                                                        |    |
| 13 |                    |                     |                                                                |    |
| 14 |                    |                     |                                                                |    |
| 15 | <b>Other</b>       |                     |                                                                |    |
| 16 | <b>Information</b> |                     |                                                                |    |
| 17 |                    |                     |                                                                |    |
| 18 |                    |                     |                                                                |    |
| 19 | Funding            | <a href="#">#22</a> | Give the source of funding and the role of the funders for the | 17 |
| 20 |                    |                     | present study and, if applicable, for the original study on    |    |
| 21 |                    |                     | which the present article is based                             |    |
| 22 |                    |                     |                                                                |    |
| 23 |                    |                     |                                                                |    |

None The STROBE checklist is distributed under the terms of the Creative Commons Attribution License CC-BY. This checklist can be completed online using <https://www.goodreports.org/>, a tool made by the [EQUATOR Network](#) in collaboration with [Penelope.ai](#)

# BMJ Open

## Neuroinflammation in cognitive decline post-cardiac surgery (the FOCUS study): an observational study protocol

|                                 |                                                                                                                                                                                                                                                                                                                                                                                                                                                                                                                                                                                                                                                                                                                                                                                                                                                                                                                                                                                                                                                                                                                                                                                                                                                                                                                                                                                                                                                                         |
|---------------------------------|-------------------------------------------------------------------------------------------------------------------------------------------------------------------------------------------------------------------------------------------------------------------------------------------------------------------------------------------------------------------------------------------------------------------------------------------------------------------------------------------------------------------------------------------------------------------------------------------------------------------------------------------------------------------------------------------------------------------------------------------------------------------------------------------------------------------------------------------------------------------------------------------------------------------------------------------------------------------------------------------------------------------------------------------------------------------------------------------------------------------------------------------------------------------------------------------------------------------------------------------------------------------------------------------------------------------------------------------------------------------------------------------------------------------------------------------------------------------------|
| Journal:                        | <i>BMJ Open</i>                                                                                                                                                                                                                                                                                                                                                                                                                                                                                                                                                                                                                                                                                                                                                                                                                                                                                                                                                                                                                                                                                                                                                                                                                                                                                                                                                                                                                                                         |
| Manuscript ID                   | bmjopen-2020-044062.R1                                                                                                                                                                                                                                                                                                                                                                                                                                                                                                                                                                                                                                                                                                                                                                                                                                                                                                                                                                                                                                                                                                                                                                                                                                                                                                                                                                                                                                                  |
| Article Type:                   | Protocol                                                                                                                                                                                                                                                                                                                                                                                                                                                                                                                                                                                                                                                                                                                                                                                                                                                                                                                                                                                                                                                                                                                                                                                                                                                                                                                                                                                                                                                                |
| Date Submitted by the Author:   | 12-Feb-2021                                                                                                                                                                                                                                                                                                                                                                                                                                                                                                                                                                                                                                                                                                                                                                                                                                                                                                                                                                                                                                                                                                                                                                                                                                                                                                                                                                                                                                                             |
| Complete List of Authors:       | Peters van Ton, Annemieke; Radboudumc, Department of Intensive Care Medicine; Radboudumc, Radboud Institute for Molecular Life Sciences Duindam, Harmke; Radboudumc, Department of Intensive Care Medicine; Radboudumc, Radboud Institute of Molecular Life Sciences van Tuijl, Julia; Radboudumc, Department of Internal Medicine; Radboudumc, Radboud Institute for Molecular Life Sciences Li, Wilson; Radboudumc, Department of Cardiothoracic Surgery Dieker, Hendrik-Jan; Radboudumc, Department of Cardiology Riksen, Niels; Radboudumc, Department of Internal Medicine; Radboudumc, Radboud Institute for Molecular Life Sciences Meijer, F.J.; Radboudumc, Department of Medical Imaging; Radboudumc, Radboud Institute for Health Sciences Kessels, Roy; Radboudumc, Department of Medical Psychology; Radboud University, Donders Center for Cognition Kohn, Nils; Radboudumc, Donders Institute for Brain, Cognition and Behaviour, Cognitive Neuroscience, van der Hoeven, J.G; Radboudumc, Department of Intensive Care Medicine; Radboudumc, Radboud Institute for Health Sciences Pickkers, Peter; Radboudumc, Department of Intensive Care Medicine; Radboudumc, Radboud Institute for Molecular Life Sciences Rijpkema, Mark; Radboudumc, Department of Medical Imaging; Radboudumc, Radboud Institute for Health Sciences Abdo, Wilson; Radboudumc, Department of Intensive Care Medicine; Radboudumc, Radboud Institute of Molecular Life Sciences |
| <b>Primary Subject Heading</b>: | Cardiovascular medicine                                                                                                                                                                                                                                                                                                                                                                                                                                                                                                                                                                                                                                                                                                                                                                                                                                                                                                                                                                                                                                                                                                                                                                                                                                                                                                                                                                                                                                                 |
| Secondary Subject Heading:      | Immunology (including allergy), Neurology, Mental health                                                                                                                                                                                                                                                                                                                                                                                                                                                                                                                                                                                                                                                                                                                                                                                                                                                                                                                                                                                                                                                                                                                                                                                                                                                                                                                                                                                                                |
| Keywords:                       | Cardiac surgery < SURGERY, IMMUNOLOGY, Delirium & cognitive disorders < PSYCHIATRY, NUCLEAR MEDICINE, INTENSIVE & CRITICAL CARE                                                                                                                                                                                                                                                                                                                                                                                                                                                                                                                                                                                                                                                                                                                                                                                                                                                                                                                                                                                                                                                                                                                                                                                                                                                                                                                                         |
|                                 |                                                                                                                                                                                                                                                                                                                                                                                                                                                                                                                                                                                                                                                                                                                                                                                                                                                                                                                                                                                                                                                                                                                                                                                                                                                                                                                                                                                                                                                                         |

SCHOLARONE™  
Manuscripts

1  
2  
3  
4  
5  
6  
7  
8  
9  
10  
11  
12  
13  
14  
15  
16  
17  
18  
19  
20  
21  
22  
23  
24  
25  
26  
27  
28  
29  
30  
31  
32  
33  
34  
35  
36  
37  
38  
39  
40  
41  
42  
43  
44  
45  
46  
47  
48  
49  
50  
51  
52  
53  
54  
55  
56  
57  
58  
59  
60

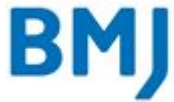

I, the Submitting Author has the right to grant and does grant on behalf of all authors of the Work (as defined in the below author licence), an exclusive licence and/or a non-exclusive licence for contributions from authors who are: i) UK Crown employees; ii) where BMJ has agreed a CC-BY licence shall apply, and/or iii) in accordance with the terms applicable for US Federal Government officers or employees acting as part of their official duties; on a worldwide, perpetual, irrevocable, royalty-free basis to BMJ Publishing Group Ltd ("BMJ") its licensees and where the relevant Journal is co-owned by BMJ to the co-owners of the Journal, to publish the Work in this journal and any other BMJ products and to exploit all rights, as set out in our [licence](#).

The Submitting Author accepts and understands that any supply made under these terms is made by BMJ to the Submitting Author unless you are acting as an employee on behalf of your employer or a postgraduate student of an affiliated institution which is paying any applicable article publishing charge ("APC") for Open Access articles. Where the Submitting Author wishes to make the Work available on an Open Access basis (and intends to pay the relevant APC), the terms of reuse of such Open Access shall be governed by a Creative Commons licence – details of these licences and which [Creative Commons](#) licence will apply to this Work are set out in our licence referred to above.

Other than as permitted in any relevant BMJ Author's Self Archiving Policies, I confirm this Work has not been accepted for publication elsewhere, is not being considered for publication elsewhere and does not duplicate material already published. I confirm all authors consent to publication of this Work and authorise the granting of this licence.

# Neuroinflammation in cognitive decline post-cardiac surgery (the FOCUS study): an observational study protocol

Annemieke M. Peters van Ton<sup>1,8\*</sup>, Harmke B. Duindam<sup>1,8\*</sup>, Julia van Tuijl<sup>2,8</sup>,  
Wilson W.L. Li<sup>3</sup>, Hendrik-Jan Dieker<sup>4</sup>, Niels P. Riksen<sup>2,8</sup>, F.J. Anton Meijer<sup>5,10</sup>,  
Roy P.C. Kessels<sup>6,7</sup>, Nils Kohn<sup>9</sup>, Johannes G. van der Hoeven<sup>1,10</sup>, Peter Pickkers<sup>1,8</sup>,  
Mark Rijpkema<sup>5,10</sup>, Wilson F. Abdo<sup>1,8</sup>

\* shared first authorship

<sup>1</sup> Radboud university medical center, Department of Intensive Care Medicine, Nijmegen, The Netherlands.

<sup>2</sup> Radboud university medical center, Department of Internal Medicine, Nijmegen, The Netherlands

<sup>3</sup> Radboud university medical center, Department of Cardiothoracic Surgery, Nijmegen, The Netherlands

<sup>4</sup> Radboud university medical center, Department of Cardiology, Nijmegen, The Netherlands

<sup>5</sup> Radboud university medical center, Department of Medical Imaging, Nijmegen, The Netherlands

<sup>6</sup> Radboud university medical center, Department of Medical Psychology, Nijmegen, The Netherlands

<sup>7</sup> Radboud University, Donders Centre for Cognition, Nijmegen, The Netherlands

<sup>8</sup> Radboud university medical center, Radboud Institute for Molecular Life Sciences, Nijmegen, The Netherlands

<sup>9</sup> Radboud university medical center, Donders Institute for Brain, Cognition and Behaviour, Cognitive Neuroscience, Nijmegen, The Netherlands

<sup>10</sup> Radboud university medical center, Radboud Institute for Health Sciences, Nijmegen, The Netherlands

## **Corresponding author**

Dr. Wilson F. Abdo, MD, PhD

Department of Intensive Care Medicine, IP 707

Radboud university medical center

P.O. Box 9101

6500 HB Nijmegen

The Netherlands

**Phone:** +31 (0) 24 36 17273

**Email:** [f.abdo@radboudumc.nl](mailto:f.abdo@radboudumc.nl)

**Word count:** 3930

## ABSTRACT

### Introduction

Postoperative cognitive dysfunction (POCD) occurs frequently after coronary artery bypass grafting (CABG). The underlying mechanisms remain poorly understood, but neuroinflammation might play a pivotal role. We hypothesize that systemic inflammation induced by the surgical trauma could activate the innate immune (glial) cells of the brain. This could lead to an exaggerated neuroinflammatory cascade, resulting in neuronal dysfunction and loss of neuronal cells. Therefore, the aims of this study are to assess neuroinflammation *in vivo* pre- and post-surgery in patients undergoing major cardiac surgery and investigate whether there is a relationship of neuroinflammation to cognitive outcomes, changes to brain structure and function, and systemic inflammation.

### Methods and analysis

The FOCUS study is a prospective, single-centre observational study, including 30 patients undergoing elective on-pump CABG. Translocator protein (TSPO) PET neuroimaging will be performed pre- and postoperatively using the second generation tracer <sup>18</sup>F-DPA-714 to assess the neuroinflammatory response. In addition, a comprehensive cerebral MRI will be performed pre- and post-surgery, in order to discover newly developed brain and vascular wall lesions. Up to 6 months postoperatively, serial extensive neurocognitive assessments will be performed and blood will be obtained to quantify systemic inflammatory responses and peripheral immune cell activation.

### Ethics and dissemination

Patients do not benefit directly from engaging in the study, but imaging neuroinflammation is considered safe and no side effects are expected. The study protocol obtained ethical approval by the Medical Research Ethics Committee (MREC) region Arnhem-Nijmegen. This work will be published in peer-reviewed international medical journals and presented at medical conferences.

## Article summary

### Strengths and limitations of this study

- This study is the first to examine *in vivo* neuroinflammation using TSPO PET neuroimaging both prior to and after cardiac surgery
- This study combines state of the art neuroimaging with longitudinal neuropsychological examinations and detailed immunological analyses
- Extensive neuropsychological examinations at four different timepoints enable us to detect even subtle changes in cognitive function
- This study is powered to detect the association between neuroinflammation and cognitive decline between baseline and hospital discharge, the period of time the incidence of cognitive dysfunction is highest.
- The power of this pilot study is inadequate to adjust for confounders.

### Keywords

Postoperative cognitive dysfunction (POCD), coronary artery bypass grafting (CABG), neuroinflammation, microglia, TSPO neuroimaging

## INTRODUCTION

### Background and rationale

Coronary artery bypass grafting (CABG) has been associated with postoperative cerebral complications.[1-4] These may occur directly post-surgery, like stroke or delirium, but can also have long-term sequelae such as postoperative cognitive dysfunction (POCD) and dementia. The incidence of POCD ranges from 20-70% in the first week after surgery, to 10-40% in the following months but may increase again from one postoperative year onwards.[1, 5] Furthermore, a 1.7-fold increased risk to develop new incident Alzheimer's disease within 6 years after CABG was found, compared to patients undergoing a percutaneous coronary intervention.[6]

Development of POCD is presumably related to perioperative brain hypoperfusion, cerebral microembolization, haemodilution, hypercoagulability, cerebral hyperthermia, and inadequate glucose homeostasis.[2] In addition, systemic inflammation is hypothesized as an important (and possibly treatable) factor for POCD pathogenesis.[7-9] Cardiac surgery produces substantial systemic inflammation (reflected by leucocytosis and significant dysregulation of cytokines and other inflammatory mediators, affecting various physical processes) due to multiple stimuli such as sternotomy, extracorporeal circulation (ECC), associated transient endotoxemia, and aortic cross-clamping. Systemic inflammation can result in increased communication and signalling from the periphery to the brain.[10, 11] As a result, systemic inflammation may induce activation of the innate immune cells of the brain, the microglia and astrocytes, leading to a neuroinflammatory response.[12] Animal models demonstrated that systemic administration of low-dose endotoxin even leads to long-term inflammatory reprogramming of microglia.[13] Interestingly, research has shown that neuroinflammation is associated with cognitive dysfunction and neurodegenerative disease.[14, 15] Given these associations, we hypothesize that occurrence of POCD in patients undergoing CABG is mediated through the occurrence of neuroinflammation.

Positron Emission Tomography (PET) enables the imaging of glial activation in the CNS using radiolabelled antagonists of translocator protein (TSPO).[16, 17] TSPO is mainly expressed as a transmembrane protein on mitochondria of microglia and astrocytes in the CNS.[18] As TSPO expression is upregulated during neuroinflammatory processes, it makes a promising biomarker for imaging neuroinflammation.[19] Up to now, TSPO neuroimaging has been applied in a wide variety of neurodegenerative and psychiatric conditions, showing associations between neuroinflammation and cognitive decline.[20-22] Recently, first *in vivo* evidence of microglial activity in response to systemic inflammation has been shown in patients and healthy volunteers.[23-25] However, human *in vivo* data on neuroinflammation in patients undergoing major cardiothoracic surgery are still lacking.

This study therefore aims to assess neuroinflammation pre- and post-surgery *in vivo* in patients undergoing elective cardiac surgery. Given the presumed association between neuroinflammation and cognitive decline, quantifying the extent of neuroinflammation post-surgery and its relation to POCD will provide us with important insights for future (interventional) research.

## Objectives

Our primary objective is to assess whether neuroinflammation is more pronounced in patients with cognitive decline at hospital discharge after CABG surgery, compared to patients without cognitive decline.

Secondary objectives:

1. To study the relation between the neuroinflammatory response and structural or functional changes to the brain postoperatively.
2. To study the relation between neuroinflammation and cognitive decline at 6 weeks and 6 months post-cardiac surgery.
3. To study the relation between neuroinflammation and postoperative delirium.
4. To study the relation between the perioperative systemic immune responses and neuroinflammation.

## METHODS AND ANALYSIS

### Study design

The FOCUS study (neuroinflammation in cognitive decline post cardiac surgery) is a single-centre observational time-series design study investigating neuroinflammation, systemic inflammation and neuropsychological performance before and after CABG.

### Study population and recruitment

All patients planned for elective CABG in an academic hospital in the Netherlands are screened. Table 1 presents the inclusion- and exclusion criteria. The age criterion of 50 years or older is chosen for two reasons. First, older adults are more prone to subsequent long-term cognitive decline after cardiac surgery.[26, 27] Second, ageing is associated with a more exaggerated neuroinflammatory response following systemic inflammation.[28]

Screening and enrolment logs will be maintained for all patients. After written informed consent is obtained, a blood sample will be genotyped for rs6971 polymorphism using Taqman analysis on a 7500 Fast Real-Time PCR System (ThermoFisher Scientific, Waltham, USA). Low-affinity TSPO binding patients for the radiotracer used in PET imaging will be excluded from participation. In our predominantly Caucasian cohort, the estimated percentage of low affinity binders is below 10%.[29]

### Data collection

Patients' demographics and information regarding their surgery indication, treatments, pre-existing comorbidity (Charlson Comorbidity Index),[30, 31] (re)admission, disease severity and mortality risk, length of mechanical ventilation, length of stay at the Intensive Care Unit



(ICU) and occurrence of delirium will be retrieved from the patients' medical files. Table 2 shows an overview of events for this study, which will be defined subsequently in more detail.

**Table 1. Inclusion and exclusion criteria**

| Inclusion criteria   |                                                                                                                                                                                                                                                                                                                                                                                                                                                                                                                                                                      |
|----------------------|----------------------------------------------------------------------------------------------------------------------------------------------------------------------------------------------------------------------------------------------------------------------------------------------------------------------------------------------------------------------------------------------------------------------------------------------------------------------------------------------------------------------------------------------------------------------|
|                      | <ul style="list-style-type: none"> <li>• Written informed consent</li> <li>• Age &gt;50 years</li> <li>• Planned for elective on-pump coronary artery bypass grafting surgery</li> <li>• High- or mixed-affinity binders based on rs6971 polymorphism for translocator protein (TSPO)</li> <li>• Pre-hospital use of statins</li> </ul>                                                                                                                                                                                                                              |
| Exclusion criteria   |                                                                                                                                                                                                                                                                                                                                                                                                                                                                                                                                                                      |
| <i>Neurological</i>  | <ul style="list-style-type: none"> <li>• Neurodegenerative disease, including mild cognitive impairment</li> <li>• Brain or spinal surgery within the last 6 months</li> <li>• Meningitis or brain infection within the last 6 months</li> <li>• Brain injury (e.g. acute stroke, or subarachnoid haemorrhage) within the last 6 months</li> <li>• Severe brain trauma in previous medical history</li> <li>• Presence of a cerebrospinal fluid catheter or shunt</li> <li>• Presence of a known brain tumour</li> <li>• Pre-hospital use of neuroleptics</li> </ul> |
| <i>Inflammatory</i>  | <ul style="list-style-type: none"> <li>• Active infection (defined as fever &gt;38.5°C or antibiotic treatment) within the last 2 weeks prior to surgery</li> <li>• Immunocompromised state (due to immunomodulatory drugs or underlying conditions)</li> <li>• Auto-immune or auto-inflammatory disease</li> </ul>                                                                                                                                                                                                                                                  |
| <i>Cardiological</i> | <ul style="list-style-type: none"> <li>• Previous cardiac surgery</li> <li>• Cardiovascular event within the last 3 months</li> </ul>                                                                                                                                                                                                                                                                                                                                                                                                                                |
| <i>Other</i>         | <ul style="list-style-type: none"> <li>• Contra-indication to undergo a PET/CT or MRI scan</li> <li>• Known contrast allergy for gadolinium</li> <li>• Kidney failure (defined by a MDRD-GFR &lt;15ml/min/1.73m<sup>2</sup>)</li> <li>• Illiteracy or the inability to speak Dutch</li> <li>• Presence of disabilities that prevent accurate delirium diagnosis</li> <li>• Low TSPO binding affinity (based on rs6971 polymorphism)</li> </ul>                                                                                                                       |

**Table 2. Schedule of events**

| Timing:                       | Pre-clinical | Pre-operative                      | CABG           | Postoperative         |                        |                      | Follow-up |           |
|-------------------------------|--------------|------------------------------------|----------------|-----------------------|------------------------|----------------------|-----------|-----------|
|                               |              | T0<br>Baseline                     | T1<br>Stop ECC | T2<br>Stop ECC<br>+6h | T3<br>Incision<br>+24h | T4<br>CABG<br>+ 3-7d | T5<br>6 w | T6<br>6 m |
| Inclusion/exclusion criteria  | X            |                                    |                |                       |                        |                      |           |           |
| Informed consent              | X            |                                    |                |                       |                        |                      |           |           |
| TSPO binding affinity         | X            |                                    |                |                       |                        |                      |           |           |
| PET/CT cerebrum               |              | X                                  |                |                       |                        | X                    |           |           |
| MRI cerebrum                  |              | X                                  |                |                       |                        | X                    |           |           |
| Blood sampling                |              | X                                  | X              | X                     | X                      | X                    | X         |           |
| Neuropsychological assessment |              | X                                  |                |                       |                        | X                    | X         | X         |
| Delirium assessment           |              | 3 times daily during hospital stay |                |                       |                        |                      |           |           |

CABG = coronary artery bypass grafting; ECC = extracorporeal circulation; h=hours, d=days, w=weeks, m=months, TSPO = translocator protein, PET/CT = positron emission tomography/computed tomography, MRI: magnetic resonance imaging.

### *Cerebral imaging*

Dynamic brain PET/CT scans will be obtained preoperatively and on the fourth (range: 3<sup>rd</sup>-7<sup>th</sup>) postoperative day. Dynamic imaging of the head will be performed for 60 minutes after intravenous injection of the radiolabelled TSPO antagonist <sup>18</sup>F-DPA-714, a second generation TSPO ligand. This generation of TSPO ligands outperforms the first generation TSPO tracer, isoquinoline carboxamide (<sup>11</sup>C-PK11195), on TSPO binding affinity and PET imaging properties, but requires polymorphism genotyping and stratifying according to binding affinity status.[32] A dose of ~200 MBq of <sup>18</sup>F-DPA-714 will be administered as a slow bolus injection during 40 seconds. Scans are obtained on a Siemens Biograph mCT hybrid PET/CT scanner (Siemens, Erlangen, Germany). A low-dose CT will be acquired for attenuation correction and anatomical reference. For pharmacokinetic analysis of the PET data arterial blood sampling will be used.

In addition, a 3 Tesla brain MRI (Siemens TIM TRIO, Erlangen, Germany) will be performed on the same days as the PET/CT scans. T1-weighted MR images will be obtained to co-register with the PET images for anatomical reference. Whole brain grey matter, as well as regions of interest will be delineated using probabilistic brain region templates. The slice thickness will be 1 mm. Additionally, the following MRI sequences will be performed: T2-weighted, susceptibility weighted imaging (SWI), FLAIR, diffusion tensor imaging (DTI), resting state fMRI, TOF MR angiogram of the circle of Willis and pre- and postcontrast 3D high-resolution T1-weighted SPACE sequence to visualize vessel wall abnormalities. In order to visualize cerebral vessel wall abnormalities, 0.1 mmol/kg gadobutrol (Gadovist) contrast agent will be administered intravenously. Details on MRI settings are provided in online supplementary appendix 1.

A senior neuroradiologist blinded to all other data will systematically quantify newly developed lesions post-surgery. This enables us to analyse the relationship between neuroinflammation, neuropsychological decline and cerebral lesion load. To evaluate changes in brain functional connectivity due to an acute immune response, a resting-state fMRI measurement is implemented comparing resting state connectivity in stress-related brain circuits pre- and post-surgery.[33, 34] A previous study found positive associations between alterations in resting-state functional connectivity in the brain's default mode network and global cognitive change after cardiac surgery[35], and the current study enables us to extend these findings by studying the relationship with (neuro)inflammation.

### *Blood sampling*

Blood samples will be obtained at baseline preoperatively (T0, concomitant with the PET-scan), intra-operatively at the stop of ECC (T1), 6 hours (T2) and 24 hours (T3) after incision. The timing of blood draws is based on the peak of the systemic inflammatory response post-cardiac surgery, as shown in previous studies we performed in patients undergoing cardiac surgery.[36, 37] Additionally, blood samples will be collected concomitant with the second PET/CT-scan (T4) and six weeks postoperatively (T5) to explore to what extent the inflammatory response persists in time.

At all timepoints, common blood parameters will be measured, including haemoglobin, leucocyte and thrombocyte count, and circulating pro-and anti-inflammatory cytokines (including tumour necrosis factor alpha (TNF- $\alpha$ ), interleukin-6 (IL-6), interleukin-1 $\beta$  (IL-1 $\beta$ ), interleukin-10 (IL-10), and interleukin-1 receptor antagonist (IL-1RA)) by using simultaneous

Luminex assays. Blood will be centrifuged at 2000g for 10 minutes and the plasma will be stored at -80°C for possible future additional testing in line with the objective of this protocol. In addition, danger-associated molecular patterns (DAMPs, including high mobility group box 1 (HMGB1), heat shock protein-70 (HSP70), calgranulin-C (S100A12), calprotectin (S100A8/9), nuclear DNA, and mitochondrial DNA) will be measured as reported previously,[38] in plasma centrifuged for a second time at high speed (16000 g).

Additionally, *ex vivo* production of cytokines by stimulated isolated peripheral blood mononuclear cells (PBMCs) will be measured, including TNF- $\alpha$ , IL-6, IL-1 $\beta$ , monocyte chemoattractant protein-1 (MCP1) and IL-10. Flow cytometry analysis of whole blood will be performed as described previously,[39, 40] to study the inflammatory phenotype of the cells (including expression of human leukocyte antigen-DR (HLA-DR), C-C chemokine receptor type 2 (CCR2), CD11b, CD14, and CD16).

Arterial blood samples will be taken immediately before the <sup>18</sup>F-DPA-714 injection and during the PET-scan to measure the time course of radioactivity in plasma. In addition to this pharmacokinetic sampling, blood samples will be used to assess the ratio of <sup>18</sup>F-DPA-714 and its metabolites in order to correct the arterial input function for metabolite formation.

### *Neuropsychological assessment*

A trained psychologist will perform neuropsychological assessments preoperatively (T0), at hospital discharge (T4), after six weeks (T5) and six months (T6) follow-up. These assessments are in line with the recommendation for neuropsychological research in cardiac surgery patients.[41] Table 3 lists the full test battery used for the neuropsychological assessments as well as the self-report questionnaires. Tests were selected based on sensitivity to detect even subtle deterioration in cognitive performance, with a focus on the domains executive functioning, memory, speed of processing and language. We will use parallel versions of these tests to account for material-specific practice effects after repeated assessment.[42]

During hospitalisation, screening of delirium is standard of care. Confusion Assessment Method for the ICU (CAM-ICU) or Delirium Observation Screening scores (DOS) at the cardiothoracic ward will be performed three times a day. A dedicated senior delirium researcher or neurologist will validate the diagnosis of delirium, using *DSM V criteria for delirium*. [43]

### *Cardiac surgery*

Perioperative care will be delivered according to the regular clinical protocol for CABG. This minimizes the risk of potential confounders due to variability in medical management.

**Table 3. Summary of neuropsychological testing**

| <i>Neuropsychological assessments</i>                                   |                                                                  |                                             |
|-------------------------------------------------------------------------|------------------------------------------------------------------|---------------------------------------------|
| <b>Test name</b>                                                        | <b>Domain</b>                                                    | <b>Subdomain</b>                            |
| <b><i>At timepoints T0</i></b>                                          |                                                                  |                                             |
| National Adult Reading Test – IQ[44]                                    | Premorbid intelligence (descriptive)                             | Estimation of pre-morbid intelligence level |
| <b><i>At timepoints T0, T4, T5, T6</i></b>                              |                                                                  |                                             |
| Trail Making Test B[45-47]                                              | Executive function                                               | Visual attention and task switching         |
| Stroop Colour-Word Test I, II, III[48]                                  | Executive function                                               | Susceptibility to interference              |
| Wechsler Adult Intelligence Scale-IV (WAIS) – Digit Span[49, 50]        | Executive function                                               | Working memory                              |
| Letter Digit Substitution Test (LDST)[51, 52]                           | Information processing speed                                     | Information processing speed                |
| Trail Making Test A[45-47]                                              | Information processing speed                                     | Information processing speed                |
| Rey Auditory Verbal Learning Test (RAVLT)[53, 54]                       | Episodic memory                                                  | Verbal episodic memory                      |
| Rey/Taylor Complex Figure Test –recall trials (RCFT)[55, 56]            | Episodic memory                                                  | Visual episodic memory                      |
| Rivermead Behavioural Memory Test-3 (RBMT-3), Face recognition[57]      | Episodic memory                                                  | Visual episodic memory                      |
| Rey/Taylor Complex Figure Test – copy trial (RCFT)[55, 56]              | Visuoconstructive ability                                        | Visuoconstructive ability                   |
| Letter Fluency Test (LFT)[58]                                           | Language                                                         | Semantic memory                             |
| Token Test (short form)[59]                                             | Language                                                         | Language comprehension                      |
| <i>Neuropsychological questionnaires</i>                                |                                                                  |                                             |
| <b>Test name</b>                                                        | <b>Assessment of</b>                                             |                                             |
| <b><i>At timepoints T0</i></b>                                          |                                                                  |                                             |
| Informant Questionnaire on Cognitive Decline in the Eldery (IQCODE)[60] | Subjective cognitive impairment, filled out by significant other |                                             |
| <b><i>At timepoints T0, T4, T5, T6</i></b>                              |                                                                  |                                             |
| Clinical Frailty Scale[61]                                              | Frailty screening                                                |                                             |
| RAND-36[62]                                                             | Health-related quality of life survey                            |                                             |
| Cognitive Failure Questionnaire (CFQ)[63]                               | Subjective cognitive complaints                                  |                                             |
| Hospital Anxiety and Depression Scale (HADS)[64]                        | Anxiety and depressive complaints                                |                                             |
| <b><i>At timepoints T4, T5, T6</i></b>                                  |                                                                  |                                             |
| Impact of Events Scale-Revised (IES-R)[65]                              | Distress caused by traumatic events                              |                                             |

## Data analysis

Pharmacokinetic modelling of dynamic PET data will be performed in PMOD software (PMOD Technologies LLC, Zürich, Switzerland). Binding potential ( $BP_{ND}$ ) and volume of distribution ( $V_T$ ) in several regions of interest (ROIs) will be determined using the 2-tissue compartmental model (2TCM) for each scan. Predefined ROIs include the frontal, temporal, parietal and occipital lobes, amygdala, hippocampus, thalamus, cerebellum and the brain stem.

For each patient,  $^{18}F$ -DPA-714  $BP_{ND}$  will be measured in the ROI for baseline and post-surgery PET scans. Since  $BP_{ND}$  is proportional to the availability of TSPO binding sites in the brain, an increase in  $BP_{ND}$  reflects an increase in glial activation. In addition, we will measure  $V_T$  which recently has been shown to mainly reflect changes in peripheral tracer binding during systemic inflammation, rather than changes in TSPO expression in the brain.[25][and unpublished data from our group] Therefore, both outcome measurements are required to validate these recent findings and assess glial activation accurately. Study investigators who analyse the cerebral imaging data will be blinded for inflammatory mediator results and cognitive outcomes.

No consensus about the definition of POCD has been achieved in the literature thus far.[5, 66, 67] At all timepoints, neuropsychological tests of our patients will be compared to available normative data, adjusted for age and educational level, resulting in standardized z-scores. Overall domain z-scores will be calculated by averaging the z-scores of the individual tests within a specific domain. Calculation of test performance will be supervised by an experienced clinical neuropsychologist. Additionally, z-scores of each individual test will be clinically classified as either being within the normal range (0), below average (1), or impaired (2), compared to the aforementioned normative data. "Normal performance" is defined as performance above -1 SD from the normative mean. "Below average" as between -1 SD and -1.65 SD from the normative mean (the lowest 16% of the normal population), and "impaired" as below -1.65 SD from the normative mean (the lowest 5% of the normal population).[68, 69] Thus, an overall weighted performance score will be calculated for all five cognitive domains. A cognitive domain will be clinically classified as impaired when the average weighted score of all tests within the domain is  $>1$ . We will define the presence of POCD when 1) patients are *newly* impaired in one or more domains at hospital discharge, compared to baseline, or 2) when the overall weighted performance score deteriorated in more than one domain at hospital discharge compared to baseline. Accordingly, all patients will be dichotomized into two groups: with or without POCD at hospital discharge.

The percentage change in TSPO expression (postoperative versus preoperative) will be calculated and reported as mean  $\pm$  standard error of the mean (SEM) if normally distributed. This value can be compared using unpaired t-tests between both groups with Bonferroni post-hoc correction, and additionally, linear mixed models will be performed with the presence of POCD and brain region modelled as fixed effects, and subject ID as random effect. Multiple linear regression models will be used to study the relationship between tracer uptake and neuropsychological outcomes. Age, sex, Clinical Frailty Scale, Charlson Comorbidity Index, Hospital Anxiety and Depression Scale (HADS) and the RAND-36 item health survey at inclusion can be included as covariates. Multiple logistic regression analysis is performed to correct for possible confounders such as newly developed structural brain lesions on MRI.

The trajectory of systemic inflammatory parameters and differences in timepoints will be measured with repeated measures one-way ANOVA or linear mixed models in case of missings. In addition, correlations between systemic inflammatory markers and TSPO expression will be

1  
2  
3 studied using Pearson for parametric or Spearman for non-parametric data. Multiple linear  
4 regression can be applied to correct for possible confounding factors. Unpaired t-tests will be  
5 applied to compare TSPO expression between patients with and without a delirious episode  
6 during hospital admission.  
7

8 All MRI images will be evaluated without prior notice of any clinical parameter. White matter  
9 lesions are defined as hyperintense lesions on FLAIR MRI without corresponding cerebrospinal  
10 fluid like hypo-intense lesions on the T1 weighted image. Lacunar infarcts are defined as hypo-  
11 intense areas  $>2\text{mm}$  and  $\leq 15\text{mm}$  on FLAIR and T1.[70] Territorial infarcts are defined as  
12 hyperintense lesions on FLAIR, and hypointense lesions on T1 image.[70] And finally,  
13 microbleeds are defined as small, homogenous, round foci of low signal intensity on T2\*  
14 weighted images of  $<10\text{mm}$  in diameter.[71]

15  
16 Analyses of functional and structural brain images will be performed using FSL (FMRIB's  
17 Software Library, Oxford, United Kingdom).[72] After pre-processing and denoising, subject-  
18 wise spatial maps of within network brain connectivity of the salience, executive control and  
19 default mode networks will be compared with non-parametric tests for mean differences.  
20 Vascular wall enhancement will be compared between the preoperative and postoperative  
21 assessments with paired t-tests or the Wilcoxon signed rank test if the data are non-parametric.  
22  
23

24 Descriptive statistics will be performed using IBM-SPSS software. Mean ( $\pm\text{SEM}$ ) or median  
25 (IQR) will be presented depending on the distribution of the data. Alpha will be set at 0.05  
26 throughout.  
27

28 After the first 5 patients we will schedule a technical interim analysis to establish whether a  
29 tissue reference model is a reliable, non-invasive method for pharmacokinetic analysis of TSPO  
30 neuroimaging during systemic inflammation-induced neuroinflammation. If this or other  
31 (mathematical) methods can be reliably validated in our cohort, there will be no longer need for  
32 arterial blood sampling.  
33  
34

### 35 36 37 **Sample size calculation**

38 No data on the degree of glial activation after systemic inflammatory responses in post-cardiac  
39 surgery patients are available. Research on cognitive dysfunction after cardiac surgery estimates  
40 a prevalence of approximately 50% at hospital discharge.[1, 5, 66] Therefore, we will define  
41 two groups based on the presence or absence of cognitive dysfunction at hospital discharge.  
42  
43

44 Previous studies in dementia patients observed a 15-35% higher PET tracer uptake in patients  
45 with cognitive impairment compared to healthy controls, with a standard deviation of 30%.[73,  
46 74] Therefore, we assume that patients with cognitive dysfunction at hospital discharge after  
47 cardiac surgery will have a 30% higher delta tracer uptake compared to patients without  
48 cognitive decline. To assess a 30% higher delta tracer uptake in patients with cognitive  
49 dysfunction, an unpaired two-sample t-test results in 13 patients per group with a power of 80%  
50 and a one-sided alpha of 0.05. In order to account for lower increments we will include 15  
51 patients per group resulting in a power of 85% with an alpha of 0.05 to differentiate an increase  
52 of 30% in delta tracer uptake. Consequently, we will include a total of 30 patients, assuming  
53 that 50% will have cognitive decline at hospital discharge. The investigator can decide to  
54 withdraw a subject from the study for a) urgent medical reasons, or b) if a protocol violation  
55 occurs or c) if the subject is lost to follow-up. Replacement of individuals will not be necessary  
56 in this observational cohort once both PET scans are performed (i.e. primary objective has been  
57 met).  
58  
59  
60

10

1  
2  
3  
4  
5  
6  
7  
8  
9  
10  
11  
12  
13  
14  
15  
16  
17  
18  
19  
20  
21  
22  
23  
24  
25  
26  
27  
28  
29  
30  
31  
32  
33  
34  
35  
36  
37  
38  
39  
40  
41  
42  
43  
44  
45  
46  
47  
48  
49  
50  
51  
52  
53  
54  
55  
56  
57  
58  
59  
60

Sample size calculations were conducted for the primary objective solely, considering cognitive decline at hospital discharge. Assessment of long-term cognitive outcomes (up to 6 months) together with assessment of our secondary outcomes has been set up in an exploratory setting. The data of this study will be important to calculate the power and feasibility of a subsequent prospective project focussed on long-term outcomes.

### **Interim analysis with futility stop**

An interim analysis will be performed after the first 15 subjects to validate that CABG surgery indeed induces a neuroinflammatory response, which will be assessed by TSPO PET imaging. An independent data safety and monitoring board (DSMB), composed by two clinical experts in the field of nuclear medicine and neurology, and a biostatistician, will analyse whether increased PET tracer uptake is observed after CABG surgery compared to the preoperative baseline tracer uptake. If no trend towards a significant difference ( $p > 0.10$ ) will be observed, the inclusion will be stopped to prevent futility. Furthermore an adaptive power analysis will be performed by the unblinded statistician DSMB member during the interim analysis to determine whether the study is underpowered to fulfil the primary objective, and whether the sample size should be adapted. The pooled standard deviation (SD) of the delta PET tracer uptake will be calculated from the first 15 patients of which approximately 50% have cognitive disorders at hospital discharge. Using this pooled SD the sample size calculation will be performed again. If the ratio between this new sample size and the original is greater than 1, the sample size will be adapted if deemed feasible. The investigators will remain blinded for cognitive outcomes until the end of the study.

### **Study period**

The study started enrolling patients in March 2019. The estimated study enrolment completion date is anticipated in the beginning of 2022. Please note that this manuscript was finalised prior to the interim analyses.

### **Ethics and dissemination**

The study is conducted according to the principles of the Declaration of Helsinki and in accordance with the Dutch Medical Research Involving Human Subjects Act (WMO) and Good Clinical Practice guidelines. The study obtained ethical approval by the Medical Research Ethics Committee (MREC) region Arnhem-Nijmegen (CMO 2016-2598). The study is registered in the ClinicalTrials.gov database (NCT 04520802). The burden of the study protocol consists of two PET/CT-scans and two cerebral MRIs, additional blood sampling before, during and after surgery and four neuropsychological examinations, two during hospital admission and two follow-up visits during the first 6 months after hospital discharge.

### **Patient and public involvement statement**

The hypothesis of this study was conceived with the help of patients through outpatient clinical follow-up after an ICU admission. Through patient experience of different long-term

1  
2  
3 consequences, this study's endpoints involves cognitive performance, psychological symptoms  
4 and quality of life. A patient member of the MREC judged the study protocol for feasibility,  
5 burden and understandability of patient information.  
6  
7

### 8 **Data management**

9  
10 Data will be handled confidentially and pseudonymously. Study data will be de-identified and  
11 a secured subject identification code list will be kept and stored separately from the data. This  
12 observational study uses an electronic remote data capture system. All missing and ambiguous  
13 data will be queried. The investigator will permit study-related monitoring, audits and  
14 regulatory inspection at their site, providing access to source data/documents. In all cases, it  
15 remains the responsibility of the investigator to ensure that data are accurate. Coded data will  
16 be kept after closure of the study and can only be used for ancillary studies after strict approval  
17 of the principal investigator. Anonymized data can be shared with other organizations for  
18 academic research, consensus development or other projects aimed at advancement of  
19 knowledge in this area. Body materials consisting of blood will be preserved in a coded form  
20 for 10 years for possible follow-up studies. The MREC will be consulted before body material  
21 is used for follow-up research.  
22  
23  
24  
25  
26

### 27 **Public disclosure and publication policy**

28  
29 The results of this study will be published, regardless of whether these are positive, negative or  
30 inconclusive, in peer-reviewed international (open access) medical journals and presented at  
31 medical conferences. In addition, a summary of the results of this study will be published on  
32 the website of the funding agency The Netherlands Organization for Health Research and  
33 Development (ZonMw).  
34  
35  
36

### 37 **Relevance of findings**

38  
39 Cerebral dysfunction after cardiac surgery occurs frequently and may severely affect patients'  
40 daily lives. Due to the lack of research data within this area, the pathophysiology of cerebral  
41 dysfunction post-surgery is unknown. Therefore, there are currently no interventions available  
42 to prevent or treat this deterioration. The FOCUS study will quantify glial activation, which is  
43 suggested to be important in this pathophysiology, and relate this to cognition, structural and  
44 functional changes to the brain and systemic inflammation. This adds to previous and ongoing  
45 observational work perioperatively combining blood and cerebrospinal fluid parameters with  
46 MR neuroimaging, cognition and electroencephalogram recordings.[75, 76] Our study  
47 combines state of the art molecular and MR neuroimaging techniques, elaborates longitudinal  
48 neuropsychological examinations, and comprehensive immunological laboratory tests.  
49 Objective neurocognitive examinations will be performed at four different timepoints, up to six  
50 months postoperatively, enabling us to detect even subtle changes in cognition. Better  
51 understanding of the pathogenesis of POCD could direct neuroscientists towards the  
52 development of targets for future interventions. This imaging paradigm could provide an  
53 approach to examine the efficacy of such interventions in clinical studies.  
54  
55  
56  
57

58 In addition, the knowledge obtained with this study is of importance for patients and healthcare  
59 professionals as well. The participating patient will not directly benefit from study participation.  
60 However, they will be followed with regard to possible complaints in light of potential post-



1  
2  
3 cardiac surgery cerebral dysfunction. This will increase the awareness of the participating  
4 patients and caregivers with respect to such complaints. This might benefit the patient and  
5 caregivers as it will decrease uncertainty about the nature of the complaints when they occur.  
6 Furthermore this study searches for a biological explanation for post-surgery cerebral  
7 complaints which are often not understood or classified as functional.  
8

9  
10 Several limitations need to be addressed. First, as this study is powered at cognitive decline at  
11 hospital discharge, it is not powered to study the association between glial activation and  
12 cognitive decline after 6 months. The second limitation concerns the arterial sampling during  
13 the dynamic PET-scans. Automated arterial sampling, which is frequently used in other studies  
14 using outpatient clinic patients, leads to a significant loss of blood per scan. Loss of such an  
15 amount of blood in cardiac surgery patients is not preferable as it could result in a significant  
16 health risk for these critically ill patients. Therefore we will sample manually, which reduces  
17 blood volume loss. Manual sampling results in less sampling points and could therefore lead to  
18 a slightly less accurate plasma activity curve. Finally, the power of this pilot study is inadequate  
19 to allow adjustment for confounding factors.  
20  
21

22  
23 Imaging neuroinflammation as proposed is safe, as corroborated by existing human and animal  
24 data. In addition, imaging neuroinflammation could lead to potential prognostic and  
25 interventional targets that could revolutionize healthcare for this large group of patients.  
26  
27  
28  
29  
30  
31  
32  
33  
34  
35  
36  
37  
38  
39  
40  
41  
42  
43  
44  
45  
46  
47  
48  
49  
50  
51  
52  
53  
54  
55  
56  
57  
58  
59  
60

## References

1. Greaves, D., et al., *Cognitive outcomes following coronary artery bypass grafting: A systematic review and meta-analysis of 91,829 patients*. Int J Cardiol, 2019. **289**: p. 43-49.
2. Berger, M., et al., *Neurocognitive Function after Cardiac Surgery: From Phenotypes to Mechanisms*. Anesthesiology, 2018. **129**(4): p. 829-851.
3. Brown, C.H.t., et al., *Cognitive Decline after Delirium in Patients Undergoing Cardiac Surgery*. Anesthesiology, 2018. **129**(3): p. 406-416.
4. Sauer, A.C., et al., *Association between delirium and cognitive change after cardiac surgery*. Br J Anaesth, 2017. **119**(2): p. 308-315.
5. Bruce, K., et al., *The impact of cardiac surgery on cognition*. Stress and Health, 2008. **24**(3): p. 249-266.
6. Lee, T.A., et al., *Assessment of the emergence of Alzheimer's disease following coronary artery bypass graft surgery or percutaneous transluminal coronary angioplasty*. Journal of Alzheimer's Disease, 2005. **7**(4): p. 319-324.
7. Wan, Y., et al., *Postoperative impairment of cognitive function in rats: a possible role for cytokine-mediated inflammation in the hippocampus*. Anesthesiology, 2007. **106**(3): p. 436-43.
8. Cibelli, M., et al., *Role of interleukin-1beta in postoperative cognitive dysfunction*. Ann Neurol, 2010. **68**(3): p. 360-8.
9. Cao, X.Z., et al., *Postoperative cognitive deficits and neuroinflammation in the hippocampus triggered by surgical trauma are exacerbated in aged rats*. Prog Neuropsychopharmacol Biol Psychiatry, 2010. **34**(8): p. 1426-32.
10. Varatharaj, A. and I. Galea, *The blood-brain barrier in systemic inflammation*. Brain, Behavior, and Immunity, 2017. **60**: p. 1-12.
11. D'Mello, C. and M.G. Swain, *Immune-to-Brain Communication Pathways in Inflammation-Associated Sickness and Depression*. Curr Top Behav Neurosci, 2017. **31**: p. 73-94.
12. Perry, V.H. and C. Holmes, *Microglial priming in neurodegenerative disease*. Nat Rev Neurol, 2014. **10**(4): p. 217-24.
13. Wendeln, A.C., et al., *Innate immune memory in the brain shapes neurological disease hallmarks*. Nature, 2018. **556**(7701): p. 332-338.
14. Dheen, S.T., C. Kaur, and E.A. Ling, *Microglial activation and its implications in the brain diseases*. Curr Med Chem, 2007. **14**(11): p. 1189-97.
15. Streit, W.J., R.E. Mrazek, and W.S. Griffin, *Microglia and neuroinflammation: a pathological perspective*. J Neuroinflammation, 2004. **1**(1): p. 14.
16. Turkheimer, F.E., et al., *The methodology of TSPO imaging with positron emission tomography*. Biochem Soc Trans, 2015. **43**(4): p. 586-92.
17. Song, Y.S., *Perspectives in TSPO PET Imaging for Neurologic Diseases*. Nucl Med Mol Imaging, 2019. **53**(6): p. 382-385.
18. Casellas, P., *Peripheral benzodiazepine receptors and mitochondrial function*. Neurochemistry International, 2002. **40**(6): p. 475-486.
19. Lee, Y., et al., *Translocator protein (TSPO): the new story of the old protein in neuroinflammation*. BMB Rep, 2020. **53**(1): p. 20-27.
20. Bradburn, S., C. Murgatroyd, and N. Ray, *Neuroinflammation in mild cognitive impairment and Alzheimer's disease: A meta-analysis*. Ageing Res Rev, 2019. **50**: p. 1-8.
21. Plavén-Sigray, P., et al., *Positron Emission Tomography Studies of the Glial Cell Marker Translocator Protein in Patients With Psychosis: A Meta-analysis Using Individual Participant Data*. Biol Psychiatry, 2018. **84**(6): p. 433-442.
22. Enache, D., C.M. Pariante, and V. Mondelli, *Markers of central inflammation in major depressive disorder: A systematic review and meta-analysis of studies examining cerebrospinal fluid, positron emission tomography and post-mortem brain tissue*. Brain Behav Immun, 2019. **81**: p. 24-40.
23. Sandiego, C.M., et al., *Imaging robust microglial activation after lipopolysaccharide administration in humans with PET*. Proc Natl Acad Sci U S A, 2015. **112**(40): p. 12468-73.

- 1
- 2
- 3 24. Forsberg, A., et al., *The immune response of the human brain to abdominal surgery*. Ann Neurol, 2017. **81**(4): p. 572-582.
- 4
- 5 25. Nettis, M.A., et al., *PET imaging shows no changes in TSPO brain density after IFN-alpha immune challenge in healthy human volunteers*. Transl Psychiatry, 2020. **10**(1): p. 89.
- 6
- 7 26. Newman, M.F., et al., *Longitudinal assessment of neurocognitive function after coronary-artery bypass surgery*. N Engl J Med, 2001. **344**(6): p. 395-402.
- 8
- 9 27. Glumac, S., G. Kardum, and N. Karanovic, *Postoperative Cognitive Decline After Cardiac Surgery: A Narrative Review of Current Knowledge in 2019*. Med Sci Monit, 2019. **25**: p. 3262-3270.
- 10
- 11
- 12 28. Norden, D.M. and J.P. Godbout, *Review: microglia of the aged brain: primed to be activated and resistant to regulation*. Neuropathol Appl Neurobiol, 2013. **39**(1): p. 19-34.
- 13
- 14 29. Owen, D.R., et al., *An 18-kDa translocator protein (TSPO) polymorphism explains differences in binding affinity of the PET radioligand PBR28*. J Cereb Blood Flow Metab, 2012. **32**(1): p. 1-5.
- 15
- 16
- 17 30. Charlson, M.E., et al., *A new method of classifying prognostic comorbidity in longitudinal studies: development and validation*. J Chronic Dis, 1987. **40**(5): p. 373-83.
- 18
- 19 31. Quan, H., et al., *Updating and validating the Charlson comorbidity index and score for risk adjustment in hospital discharge abstracts using data from 6 countries*. Am J Epidemiol, 2011. **173**(6): p. 676-82.
- 20
- 21
- 22
- 23 32. Owen, D.R., et al., *Mixed-affinity binding in humans with 18-kDa translocator protein ligands*. J Nucl Med, 2011. **52**(1): p. 24-32.
- 24
- 25 33. Hermans, E.J., et al., *Dynamic adaptation of large-scale brain networks in response to acute stressors*. Trends Neurosci, 2014. **37**(6): p. 304-14.
- 26
- 27 34. Kohn, N., E.J. Hermans, and G. Fernández, *Cognitive benefit and cost of acute stress is differentially modulated by individual brain state*. Soc Cogn Affect Neurosci, 2017. **12**(7): p. 1179-1187.
- 28
- 29
- 30 35. Browndyke, J.N., et al., *Resting-State Functional Connectivity and Cognition After Major Cardiac Surgery in Older Adults without Preoperative Cognitive Impairment: Preliminary Findings*. J Am Geriatr Soc, 2017. **65**(1): p. e6-e12.
- 31
- 32 36. Hoedemaekers, C., et al., *The complement system is activated in a biphasic pattern after coronary artery bypass grafting*. Ann Thorac Surg, 2010. **89**(3): p. 710-6.
- 33
- 34 37. Hoedemaekers, C.W., et al., *Intensive insulin therapy does not alter the inflammatory response in patients undergoing coronary artery bypass grafting: a randomized controlled trial [ISRCTN95608630]*. Crit Care, 2005. **9**(6): p. R790-7.
- 35
- 36
- 37 38. Leijte, G.P., et al., *Increased Plasma Levels of Danger-Associated Molecular Patterns Are Associated With Immune Suppression and Postoperative Infections in Patients Undergoing Cytoreductive Surgery and Hyperthermic Intraperitoneal Chemotherapy*. Front Immunol, 2018. **9**: p. 663.
- 38
- 39 39. Noz, M.P., et al., *Sixteen-Week Physical Activity Intervention in Subjects With Increased Cardiometabolic Risk Shifts Innate Immune Function Towards a Less Proinflammatory State*. J Am Heart Assoc, 2019. **8**(21): p. e013764.
- 40
- 41 40. Leijte, G.P., et al., *Monocytic HLA-DR expression kinetics in septic shock patients with different pathogens, sites of infection and adverse outcomes*. Critical Care, 2020. **24**(1): p. 110.
- 42
- 43 41. Murkin, J.M., et al., *Statement of consensus on assessment of neurobehavioral outcomes after cardiac surgery*. Ann Thorac Surg, 1995. **59**(5): p. 1289-95.
- 44
- 45 42. Beglinger, L.J., et al., *Practice effects and the use of alternate forms in serial neuropsychological testing*. Arch Clin Neuropsychol, 2005. **20**(4): p. 517-29.
- 46
- 47 43. American Psychiatric Association, *Diagnostic and Statistical Manual of Mental Disorders, 5th Edition*. 2013, Arlington, VA. .
- 48
- 49 44. Nelson, H.E. and A. O'Connell, *Dementia: the estimation of premorbid intelligence levels using the New Adult Reading Test*. Cortex, 1978. **14**(2): p. 234-44.
- 50
- 51 45. Partington, J.E. and R.G. Leiter, *Partington's Pathways Test*. Psychological Service Center Journal, 1949. **1**: p. 11-20.
- 52
- 53 46. Reitan, R.M. and D. Wolfson, *The Halstead-Reitan Neuropsychological Test Battery*. 1985, Tuscon, AZ: Neuropsychological Press.
- 54
- 55
- 56
- 57
- 58
- 59
- 60

- 1
- 2
- 3 47. Larrabee, G.J., S.R. Millis, and J.E. Meyers, *Sensitivity to Brain Dysfunction of the Halstead-Reitan vs an Ability-Focused Neuropsychological Battery*. The Clinical Neuropsychologist, 2008. **22**(5): p. 813-825.
- 4
- 5
- 6 48. Stroop, J.R., *Studies of interference in serial verbal reactions*. Journal of Experimental Psychology, 1935. **18**(6): p. 643-662.
- 7
- 8 49. Kessels, R.P.C., P.W. Molleman, and J.M. Oosterman, *Assessment of working-memory deficits in patients with mild cognitive impairment and Alzheimer's dementia using Wechsler's Working Memory Index*. Aging Clinical and Experimental Research, 2011. **23**(5): p. 487-490.
- 9
- 10 50. Wechsler, D., *Wechsler Adult Intelligence Scale-Fourth edition-Nederlandse bewerking. Technische handleiding en Afname en scorehandleiding*. 2012, Amsterdam: Pearson Assessment and Information BV.
- 11
- 12 51. Natu, M.V. and A.K. Agarwal, *Digit letter substitution test (DLST) as an alternative to digit symbol substitution test (DSST)*. Human Psychopharmacology: Clinical and Experimental, 1995. **10**(4): p. 339-343.
- 13
- 14 52. Jolles J; Houx P.J.; van Boxtel M.P.J., e.a., *The maastricht aging study: Determinants of cognitive aging*. 1995, Maastricht: Neuropsych Publishers.
- 15
- 16 53. Schmidt, M., *Rey auditory verbal learning test: Ravlt: A handbook*. 1996: Western Psychological Services.
- 17
- 18 54. Saan, R.J. and B.G. Deelman, *De 15-woordentest A en B*. 1986, Groningen: Afdeling Neuropsychologie, AZG.
- 19
- 20 55. Rey, A., *Psychological examination of traumatic encephalopathy*. Clinical Neuropsychologist, 1993. **7**(1): p. 3-21.
- 21
- 22 56. Meyers, J.E., Meyers, K.R., *Rey complex figure test and recognition trial: Professional manual*. . 1995, Odessa: Psychological Assessment Resources.
- 23
- 24 57. Wilson, B., J. Cockburn, and A. Baddeley, *The Rivermead behavioural memory test manual*. . 1985, Bury St Edmunds: Thames Valley Test Co.
- 25
- 26 58. Mulder, J.L.D., P.H.; Dekker, R., *Word-fluency test/figure fluency test (wft/fft)*. . 2006, Leiden: PITS Uitgeverij BV.
- 27
- 28 59. De Renzi, E. and P. Faglioni, *Normative data and screening power of a shortened version of the Token Test*. Cortex, 1978. **14**(1): p. 41-9.
- 29
- 30 60. Jorm, A.F. and P.A. Jacomb, *The Informant Questionnaire on Cognitive Decline in the Elderly (IQCODE): socio-demographic correlates, reliability, validity and some norms*. Psychol Med, 1989. **19**(4): p. 1015-22.
- 31
- 32 61. Rockwood, K., et al., *A global clinical measure of fitness and frailty in elderly people*. Cmaj, 2005. **173**(5): p. 489-95.
- 33
- 34 62. Hays, R.D., C.D. Sherbourne, and R.M. Mazel, *The RAND 36-Item Health Survey 1.0*. Health Econ, 1993. **2**(3): p. 217-27.
- 35
- 36 63. Broadbent, D.E., et al., *The Cognitive Failures Questionnaire (CFQ) and its correlates*. Br J Clin Psychol, 1982. **21**(1): p. 1-16.
- 37
- 38 64. Spinhoven, P., et al., *A validation study of the Hospital Anxiety and Depression Scale (HADS) in different groups of Dutch subjects*. Psychol Med, 1997. **27**(2): p. 363-70.
- 39
- 40 65. Creamer, M., R. Bell, and S. Failla, *Psychometric properties of the Impact of Event Scale - Revised*. Behav Res Ther, 2003. **41**(12): p. 1489-96.
- 41
- 42 66. Rudolph, J.L., et al., *Measurement of post-operative cognitive dysfunction after cardiac surgery: a systematic review*. Acta Anaesthesiol Scand, 2010. **54**(6): p. 663-77.
- 43
- 44 67. Needham, M.J., C.E. Webb, and D.C. Bryden, *Postoperative cognitive dysfunction and dementia: what we need to know and do*. Br J Anaesth, 2017. **119**(suppl\_1): p. i115-i125.
- 45
- 46 68. van den Berg, E., et al., *Mild impairments in cognition in patients with type 2 diabetes mellitus: the use of the concepts MCI and CIND*. Journal of Neurology, Neurosurgery & Psychiatry, 2005. **76**(10): p. 1466-1467.
- 47
- 48 69. Reukers, D.F.M., et al., *Objective cognitive performance and subjective complaints in patients with chronic Q fever or Q fever fatigue syndrome*. BMC Infectious Diseases, 2020. **20**(1): p. 397.
- 49
- 50 70. Hervé, D., et al., *Shape and volume of lacunar infarcts: a 3D MRI study in cerebral autosomal dominant arteriopathy with subcortical infarcts and leukoencephalopathy*. Stroke, 2005. **36**(11): p. 2384-8.
- 51
- 52
- 53
- 54
- 55
- 56
- 57
- 58
- 59
- 60

- 1
- 2
- 3 71. Ashburner, J. and K.J. Friston, *Unified segmentation*. Neuroimage, 2005. **26**(3): p. 839-51.
- 4 72. Jenkinson, M., et al., *FSL*. Neuroimage, 2012. **62**(2): p. 782-90.
- 5 73. Suridjan, I., et al., *In-vivo imaging of grey and white matter neuroinflammation in Alzheimer's*  
6 *disease: a positron emission tomography study with a novel radioligand, [18F]-FEPPA*. Mol  
7 *Psychiatry*, 2015. **20**(12): p. 1579-87.
- 8 74. Varrone, A., et al., *Positron emission tomography imaging of the 18-kDa translocator protein*  
9 *(TSPO) with [18F]FEMPA in Alzheimer's disease patients and control subjects*. Eur J Nucl  
10 *Med Mol Imaging*, 2015. **42**(3): p. 438-46.
- 11 75. Berger, M., et al., *The INTUIT Study: Investigating Neuroinflammation Underlying*  
12 *Postoperative Cognitive Dysfunction*. J Am Geriatr Soc, 2019. **67**(4): p. 794-798.
- 13 76. Danielson, M., et al., *Neuroinflammatory markers associate with cognitive decline after major*  
14 *surgery: Findings of an explorative study*. Ann Neurol, 2020. **87**(3): p. 370-382.
- 15
- 16
- 17
- 18
- 19
- 20
- 21
- 22
- 23
- 24
- 25
- 26
- 27
- 28
- 29
- 30
- 31
- 32
- 33
- 34
- 35
- 36
- 37
- 38
- 39
- 40
- 41
- 42
- 43
- 44
- 45
- 46
- 47
- 48
- 49
- 50
- 51
- 52
- 53
- 54
- 55
- 56
- 57
- 58
- 59
- 60

For peer review only

### **Acknowledgements:**

The authors are very grateful for the help of our colleagues at the department of Radiology and Nuclear Medicine, especially Gerben Franssen, Desirée Bos, Peter Laverman, Jurrian Butter, Peter Kok, Maichel van Riel, Michel de Groot, Marijke Hogenkamp, and Judith Thijssen. In addition, we wish to thank Petra Budde, Jacqueline Blaauwbroek, and Tanja Derks from the cardiothoracic planning office, for their help and flexibility in scheduling study patients. Assistance provided by the psychologists Chiara Fasotti, Claudette van Roij, Maud van Dorst, and Lizzy van der Horst in performing the neuropsychological examinations was greatly appreciated. Furthermore we wish to thank Jelle Gerretsen and Matthijs Kox from the Intensive Care Research Unit for their input in the immunological assays in this study. Finally, this study could not be conducted without the help of the cardiothoracic surgeons, anaesthesiologists, intensivists, and ICU nurses.

### **Contributors:**

WFA conceived the study idea. APvT and WFA developed the study design to which JvT, WL, HJD, NPR, FJAM, RPCK, NK, JvdH, PP and MR contributed. APvT and HBD drafted the manuscript. All authors were involved in the editing of the manuscript and read and approved the final manuscript.

### **Funding:**

WFA and this study were supported by a research grant from the Netherlands Organization for Health Research and Development (ZonMW Clinical Fellowship grant 90715610). This funding agency had no role in the concept, design or writing of this study.

**Competing interests:** None declared.

## Supplemental material to:

A.M. Peters van Ton et al.,  
*Neuroinflammation in cognitive decline post-cardiac surgery  
 (the FOCUS study): an observational study protocol*

### Appendix 1: MRI scan protocol – parameter settings

|                                                                     | Protocol Name | Sequence/Contrast parameters                                      | Resolution(mm)<br>Matrix Size<br>Parallel Imaging | Duration (min:secs) |
|---------------------------------------------------------------------|---------------|-------------------------------------------------------------------|---------------------------------------------------|---------------------|
| <b>T1-weighted MPRAGE</b>                                           | MPRAGE        | TR/TI/TE=2300/900/2.32ms<br>Flip angle=8°                         | 0.9x0.9x0.9mm<br>240x240x192<br>iPAT=2            | 5:21                |
| <b>T2-weighted TSE TRA</b>                                          | T2_tse_tra    | TR/TE=3500/92 ms<br>Flip angle = 120 °                            | 0.4x0.4x5mm<br>230x173x154                        | 2:01                |
| <b>Susceptibility weighted</b>                                      | F13D_SWI      | TR/TE=27/20ms<br>Flip angle = 15°                                 | 1x1x3mm<br>250x188x156<br>iPAT=2                  | 2:43                |
| <b>FLAIR</b>                                                        | T2_flair      | TR/TI/TE=9000/87/2500ms<br>Flip angle=150°                        | 0.6x0.6x5mm<br>230x173x143                        | 4:32                |
| <b>Fieldmap</b>                                                     | Gre_field     | TR/TE1/TE2=400/5.19/7.65<br>Flip angle= 60°                       | 3.8x3.8x3mm<br>240x240x135                        | 0:54                |
| <b>DTI</b>                                                          | MDDW64        | TR/TE=6900/67<br>Directions=108<br>b-value=1000 s/mm <sup>2</sup> | 2x2x2mm<br>240x240x128<br>iPAT=2                  | 12:47               |
| <b>fMRI</b>                                                         | Ep2d          | TR/TE=2390/30ms<br>Flip angle= 90°                                | 3.5x3.5x3.5<br>224x224x144                        | 6:06                |
| <b>TOF MR angiogram</b>                                             | ToF           | TR/TE=24/3.93ms<br>Flip angle= 15°                                | 0.5x0.5x0.6mm<br>200x150x154<br>iPAT=2            | 11:10               |
| <b>T1-weighted SPACE</b><br><i>pre-contrast &amp; post-contrast</i> | Tse3d_spc     | TR/TE=750/20ms                                                    | 0.5x0.5x0.9mm<br>231x231x51<br>iPAT=2             | 2x 3:49             |

# Reporting checklist for cohort study.

Based on the STROBE cohort guidelines.

## Instructions to authors

Complete this checklist by entering the page numbers from your manuscript where readers will find each of the items listed below.

Your article may not currently address all the items on the checklist. Please modify your text to include the missing information. If you are certain that an item does not apply, please write "n/a" and provide a short explanation.

Upload your completed checklist as an extra file when you submit to a journal.

In your methods section, say that you used the STROBE cohort reporting guidelines, and cite them as:

von Elm E, Altman DG, Egger M, Pocock SJ, Gøtzsche PC, Vandenbroucke JP. The Strengthening the Reporting of Observational Studies in Epidemiology (STROBE) Statement: guidelines for reporting observational studies.

|                           |                     | Reporting Item                                                                                  | Page Number |
|---------------------------|---------------------|-------------------------------------------------------------------------------------------------|-------------|
| <b>Title and abstract</b> |                     |                                                                                                 |             |
| Title                     | <a href="#">#1a</a> | Indicate the study's design with a commonly used term in the title or the abstract              | 1           |
| Abstract                  | <a href="#">#1b</a> | Provide in the abstract an informative and balanced summary of what was done and what was found | 2           |
| <b>Introduction</b>       |                     |                                                                                                 |             |
| Background / rationale    | <a href="#">#2</a>  | Explain the scientific background and rationale for the investigation being reported            | 3           |
| Objectives                | <a href="#">#3</a>  | State specific objectives, including any prespecified hypotheses                                | 4           |
| <b>Methods</b>            |                     |                                                                                                 |             |



|    |                      |                      |                                                                 |      |
|----|----------------------|----------------------|-----------------------------------------------------------------|------|
| 1  | Study design         | <a href="#">#4</a>   | Present key elements of study design early in the paper         | 4    |
| 2  |                      |                      |                                                                 |      |
| 3  | Setting              | <a href="#">#5</a>   | Describe the setting, locations, and relevant dates, including  | 4-11 |
| 4  |                      |                      | periods of recruitment, exposure, follow-up, and data           |      |
| 5  |                      |                      | collection                                                      |      |
| 6  |                      |                      |                                                                 |      |
| 7  |                      |                      |                                                                 |      |
| 8  | Eligibility criteria | <a href="#">#6a</a>  | Give the eligibility criteria, and the sources and methods of   | 4-5  |
| 9  |                      |                      | selection of participants. Describe methods of follow-up.       |      |
| 10 |                      |                      |                                                                 |      |
| 11 | Eligibility criteria | <a href="#">#6b</a>  | For matched studies, give matching criteria and number of       | NA   |
| 12 |                      |                      | exposed and unexposed                                           |      |
| 13 |                      |                      |                                                                 |      |
| 14 |                      |                      |                                                                 |      |
| 15 |                      |                      |                                                                 |      |
| 16 | Variables            | <a href="#">#7</a>   | Clearly define all outcomes, exposures, predictors, potential   | 4-11 |
| 17 |                      |                      | confounders, and effect modifiers. Give diagnostic criteria, if |      |
| 18 |                      |                      | applicable                                                      |      |
| 19 |                      |                      |                                                                 |      |
| 20 |                      |                      |                                                                 |      |
| 21 | Data sources /       | <a href="#">#8</a>   | For each variable of interest give sources of data and details  | 6-7  |
| 22 | measurement          |                      | of methods of assessment (measurement). Describe                |      |
| 23 |                      |                      | comparability of assessment methods if there is more than       |      |
| 24 |                      |                      | one group. Give information separately for for exposed and      |      |
| 25 |                      |                      | unexposed groups if applicable.                                 |      |
| 26 |                      |                      |                                                                 |      |
| 27 |                      |                      |                                                                 |      |
| 28 |                      |                      |                                                                 |      |
| 29 |                      |                      |                                                                 |      |
| 30 | Bias                 | <a href="#">#9</a>   | Describe any efforts to address potential sources of bias       | 4    |
| 31 |                      |                      |                                                                 |      |
| 32 | Study size           | <a href="#">#10</a>  | Explain how the study size was arrived at                       | 10   |
| 33 |                      |                      |                                                                 |      |
| 34 | Quantitative         | <a href="#">#11</a>  | Explain how quantitative variables were handled in the          | 9    |
| 35 | variables            |                      | analyses. If applicable, describe which groupings were          |      |
| 36 |                      |                      | chosen, and why                                                 |      |
| 37 |                      |                      |                                                                 |      |
| 38 |                      |                      |                                                                 |      |
| 39 |                      |                      |                                                                 |      |
| 40 | Statistical          | <a href="#">#12a</a> | Describe all statistical methods, including those used to       | 8-10 |
| 41 | methods              |                      | control for confounding                                         |      |
| 42 |                      |                      |                                                                 |      |
| 43 | Statistical          | <a href="#">#12b</a> | Describe any methods used to examine subgroups and              | 8-10 |
| 44 | methods              |                      | interactions                                                    |      |
| 45 |                      |                      |                                                                 |      |
| 46 |                      |                      |                                                                 |      |
| 47 | Statistical          | <a href="#">#12c</a> | Explain how missing data were addressed                         | 8-10 |
| 48 | methods              |                      |                                                                 |      |
| 49 |                      |                      |                                                                 |      |
| 50 |                      |                      |                                                                 |      |
| 51 | Statistical          | <a href="#">#12d</a> | If applicable, explain how loss to follow-up was addressed      | 10   |
| 52 | methods              |                      |                                                                 |      |
| 53 |                      |                      |                                                                 |      |
| 54 |                      |                      |                                                                 |      |
| 55 | Statistical          | <a href="#">#12e</a> | Describe any sensitivity analyses                               | NA   |
| 56 | methods              |                      |                                                                 |      |
| 57 |                      |                      |                                                                 |      |
| 58 |                      |                      |                                                                 |      |
| 59 |                      |                      |                                                                 |      |
| 60 |                      |                      |                                                                 |      |

## Results

|    |                  |                      |                                                                   |
|----|------------------|----------------------|-------------------------------------------------------------------|
| 1  |                  |                      |                                                                   |
| 2  |                  |                      |                                                                   |
| 3  | Participants     | <a href="#">#13a</a> | Report numbers of individuals at each stage of study—eg           |
| 4  |                  |                      | numbers potentially eligible, examined for eligibility,           |
| 5  |                  |                      | confirmed eligible, included in the study, completing follow-     |
| 6  |                  |                      | up, and analysed. Give information separately for for             |
| 7  |                  |                      | exposed and unexposed groups if applicable.                       |
| 8  |                  |                      |                                                                   |
| 9  |                  |                      |                                                                   |
| 10 |                  |                      |                                                                   |
| 11 | Participants     | <a href="#">#13b</a> | Give reasons for non-participation at each stage                  |
| 12 |                  |                      |                                                                   |
| 13 | Participants     | <a href="#">#13c</a> | Consider use of a flow diagram                                    |
| 14 |                  |                      |                                                                   |
| 15 |                  |                      |                                                                   |
| 16 | Descriptive data | <a href="#">#14a</a> | Give characteristics of study participants (eg demographic,       |
| 17 |                  |                      | clinical, social) and information on exposures and potential      |
| 18 |                  |                      | confounders. Give information separately for exposed and          |
| 19 |                  |                      | unexposed groups if applicable.                                   |
| 20 |                  |                      |                                                                   |
| 21 |                  |                      |                                                                   |
| 22 |                  |                      |                                                                   |
| 23 | Descriptive data | <a href="#">#14b</a> | Indicate number of participants with missing data for each        |
| 24 |                  |                      | variable of interest                                              |
| 25 |                  |                      |                                                                   |
| 26 |                  |                      |                                                                   |
| 27 | Descriptive data | <a href="#">#14c</a> | Summarise follow-up time (eg, average and total amount)           |
| 28 |                  |                      |                                                                   |
| 29 | Outcome data     | <a href="#">#15</a>  | Report numbers of outcome events or summary measures              |
| 30 |                  |                      | over time. Give information separately for exposed and            |
| 31 |                  |                      | unexposed groups if applicable.                                   |
| 32 |                  |                      |                                                                   |
| 33 |                  |                      |                                                                   |
| 34 | Main results     | <a href="#">#16a</a> | Give unadjusted estimates and, if applicable, confounder-         |
| 35 |                  |                      | adjusted estimates and their precision (eg, 95% confidence        |
| 36 |                  |                      | interval). Make clear which confounders were adjusted for         |
| 37 |                  |                      | and why they were included                                        |
| 38 |                  |                      |                                                                   |
| 39 |                  |                      |                                                                   |
| 40 |                  |                      |                                                                   |
| 41 | Main results     | <a href="#">#16b</a> | Report category boundaries when continuous variables were         |
| 42 |                  |                      | categorized                                                       |
| 43 |                  |                      |                                                                   |
| 44 |                  |                      |                                                                   |
| 45 | Main results     | <a href="#">#16c</a> | If relevant, consider translating estimates of relative risk into |
| 46 |                  |                      | absolute risk for a meaningful time period                        |
| 47 |                  |                      |                                                                   |
| 48 |                  |                      |                                                                   |
| 49 | Other analyses   | <a href="#">#17</a>  | Report other analyses done—e.g., analyses of subgroups            |
| 50 |                  |                      | and interactions, and sensitivity analyses                        |
| 51 |                  |                      |                                                                   |
| 52 |                  |                      |                                                                   |

## Discussion

|    |             |                     |                                                          |
|----|-------------|---------------------|----------------------------------------------------------|
| 53 |             |                     |                                                          |
| 54 |             |                     |                                                          |
| 55 | Key results | <a href="#">#18</a> | Summarise key results with reference to study objectives |
| 56 |             |                     |                                                          |
| 57 |             |                     |                                                          |
| 58 |             |                     |                                                          |
| 59 |             |                     |                                                          |
| 60 |             |                     |                                                          |

|    |                    |                     |                                                                |    |
|----|--------------------|---------------------|----------------------------------------------------------------|----|
| 1  | Limitations        | <a href="#">#19</a> | Discuss limitations of the study, taking into account sources  | 12 |
| 2  |                    |                     | of potential bias or imprecision. Discuss both direction and   |    |
| 3  |                    |                     | magnitude of any potential bias.                               |    |
| 4  |                    |                     |                                                                |    |
| 5  |                    |                     |                                                                |    |
| 6  | Interpretation     | <a href="#">#20</a> | Give a cautious overall interpretation considering objectives, | 12 |
| 7  |                    |                     | limitations, multiplicity of analyses, results from similar    |    |
| 8  |                    |                     | studies, and other relevant evidence.                          |    |
| 9  |                    |                     |                                                                |    |
| 10 |                    |                     |                                                                |    |
| 11 | Generalisability   | <a href="#">#21</a> | Discuss the generalisability (external validity) of the study  | 12 |
| 12 |                    |                     | results                                                        |    |
| 13 |                    |                     |                                                                |    |
| 14 |                    |                     |                                                                |    |
| 15 | <b>Other</b>       |                     |                                                                |    |
| 16 | <b>Information</b> |                     |                                                                |    |
| 17 |                    |                     |                                                                |    |
| 18 |                    |                     |                                                                |    |
| 19 | Funding            | <a href="#">#22</a> | Give the source of funding and the role of the funders for the | 17 |
| 20 |                    |                     | present study and, if applicable, for the original study on    |    |
| 21 |                    |                     | which the present article is based                             |    |
| 22 |                    |                     |                                                                |    |
| 23 |                    |                     |                                                                |    |

24 None The STROBE checklist is distributed under the terms of the Creative Commons Attribution  
25 License CC-BY. This checklist can be completed online using <https://www.goodreports.org/>, a tool  
26 made by the [EQUATOR Network](#) in collaboration with [Penelope.ai](#)  
27  
28  
29  
30  
31  
32  
33  
34  
35  
36  
37  
38  
39  
40  
41  
42  
43  
44  
45  
46  
47  
48  
49  
50  
51  
52  
53  
54  
55  
56  
57  
58  
59  
60

# BMJ Open

## Neuroinflammation in cognitive decline post-cardiac surgery (the FOCUS study): an observational study protocol

|                                 |                                                                                                                                                                                                                                                                                                                                                                                                                                                                                                                                                                                                                                                                                                                                                                                                                                                                                                                                                                                                                                                                                                                                                                                                                                                                                                                                                                                                                                                                         |
|---------------------------------|-------------------------------------------------------------------------------------------------------------------------------------------------------------------------------------------------------------------------------------------------------------------------------------------------------------------------------------------------------------------------------------------------------------------------------------------------------------------------------------------------------------------------------------------------------------------------------------------------------------------------------------------------------------------------------------------------------------------------------------------------------------------------------------------------------------------------------------------------------------------------------------------------------------------------------------------------------------------------------------------------------------------------------------------------------------------------------------------------------------------------------------------------------------------------------------------------------------------------------------------------------------------------------------------------------------------------------------------------------------------------------------------------------------------------------------------------------------------------|
| Journal:                        | <i>BMJ Open</i>                                                                                                                                                                                                                                                                                                                                                                                                                                                                                                                                                                                                                                                                                                                                                                                                                                                                                                                                                                                                                                                                                                                                                                                                                                                                                                                                                                                                                                                         |
| Manuscript ID                   | bmjopen-2020-044062.R2                                                                                                                                                                                                                                                                                                                                                                                                                                                                                                                                                                                                                                                                                                                                                                                                                                                                                                                                                                                                                                                                                                                                                                                                                                                                                                                                                                                                                                                  |
| Article Type:                   | Protocol                                                                                                                                                                                                                                                                                                                                                                                                                                                                                                                                                                                                                                                                                                                                                                                                                                                                                                                                                                                                                                                                                                                                                                                                                                                                                                                                                                                                                                                                |
| Date Submitted by the Author:   | 17-Mar-2021                                                                                                                                                                                                                                                                                                                                                                                                                                                                                                                                                                                                                                                                                                                                                                                                                                                                                                                                                                                                                                                                                                                                                                                                                                                                                                                                                                                                                                                             |
| Complete List of Authors:       | Peters van Ton, Annemieke; Radboudumc, Department of Intensive Care Medicine; Radboudumc, Radboud Institute for Molecular Life Sciences Duindam, Harmke; Radboudumc, Department of Intensive Care Medicine; Radboudumc, Radboud Institute of Molecular Life Sciences van Tuijl, Julia; Radboudumc, Department of Internal Medicine; Radboudumc, Radboud Institute for Molecular Life Sciences Li, Wilson; Radboudumc, Department of Cardiothoracic Surgery Dieker, Hendrik-Jan; Radboudumc, Department of Cardiology Riksen, Niels; Radboudumc, Department of Internal Medicine; Radboudumc, Radboud Institute for Molecular Life Sciences Meijer, F.J.; Radboudumc, Department of Medical Imaging; Radboudumc, Radboud Institute for Health Sciences Kessels, Roy; Radboudumc, Department of Medical Psychology; Radboud University, Donders Center for Cognition Kohn, Nils; Radboudumc, Donders Institute for Brain, Cognition and Behaviour, Cognitive Neuroscience, van der Hoeven, J.G; Radboudumc, Department of Intensive Care Medicine; Radboudumc, Radboud Institute for Health Sciences Pickkers, Peter; Radboudumc, Department of Intensive Care Medicine; Radboudumc, Radboud Institute for Molecular Life Sciences Rijpkema, Mark; Radboudumc, Department of Medical Imaging; Radboudumc, Radboud Institute for Health Sciences Abdo, Wilson; Radboudumc, Department of Intensive Care Medicine; Radboudumc, Radboud Institute of Molecular Life Sciences |
| <b>Primary Subject Heading</b>: | Cardiovascular medicine                                                                                                                                                                                                                                                                                                                                                                                                                                                                                                                                                                                                                                                                                                                                                                                                                                                                                                                                                                                                                                                                                                                                                                                                                                                                                                                                                                                                                                                 |
| Secondary Subject Heading:      | Immunology (including allergy), Neurology, Mental health                                                                                                                                                                                                                                                                                                                                                                                                                                                                                                                                                                                                                                                                                                                                                                                                                                                                                                                                                                                                                                                                                                                                                                                                                                                                                                                                                                                                                |
| Keywords:                       | Cardiac surgery < SURGERY, IMMUNOLOGY, Delirium & cognitive disorders < PSYCHIATRY, NUCLEAR MEDICINE, INTENSIVE & CRITICAL CARE                                                                                                                                                                                                                                                                                                                                                                                                                                                                                                                                                                                                                                                                                                                                                                                                                                                                                                                                                                                                                                                                                                                                                                                                                                                                                                                                         |
|                                 |                                                                                                                                                                                                                                                                                                                                                                                                                                                                                                                                                                                                                                                                                                                                                                                                                                                                                                                                                                                                                                                                                                                                                                                                                                                                                                                                                                                                                                                                         |

SCHOLARONE™  
Manuscripts

1  
2  
3  
4  
5  
6  
7  
8  
9  
10  
11  
12  
13  
14  
15  
16  
17  
18  
19  
20  
21  
22  
23  
24  
25  
26  
27  
28  
29  
30  
31  
32  
33  
34  
35  
36  
37  
38  
39  
40  
41  
42  
43  
44  
45  
46  
47  
48  
49  
50  
51  
52  
53  
54  
55  
56  
57  
58  
59  
60



I, the Submitting Author has the right to grant and does grant on behalf of all authors of the Work (as defined in the below author licence), an exclusive licence and/or a non-exclusive licence for contributions from authors who are: i) UK Crown employees; ii) where BMJ has agreed a CC-BY licence shall apply, and/or iii) in accordance with the terms applicable for US Federal Government officers or employees acting as part of their official duties; on a worldwide, perpetual, irrevocable, royalty-free basis to BMJ Publishing Group Ltd ("BMJ") its licensees and where the relevant Journal is co-owned by BMJ to the co-owners of the Journal, to publish the Work in this journal and any other BMJ products and to exploit all rights, as set out in our [licence](#).

The Submitting Author accepts and understands that any supply made under these terms is made by BMJ to the Submitting Author unless you are acting as an employee on behalf of your employer or a postgraduate student of an affiliated institution which is paying any applicable article publishing charge ("APC") for Open Access articles. Where the Submitting Author wishes to make the Work available on an Open Access basis (and intends to pay the relevant APC), the terms of reuse of such Open Access shall be governed by a Creative Commons licence – details of these licences and which [Creative Commons](#) licence will apply to this Work are set out in our licence referred to above.

Other than as permitted in any relevant BMJ Author's Self Archiving Policies, I confirm this Work has not been accepted for publication elsewhere, is not being considered for publication elsewhere and does not duplicate material already published. I confirm all authors consent to publication of this Work and authorise the granting of this licence.

# Neuroinflammation in cognitive decline post-cardiac surgery (the FOCUS study): an observational study protocol

Annemieke M. Peters van Ton<sup>1,8\*</sup>, Harmke B. Duindam<sup>1,8\*</sup>, Julia van Tuijl<sup>2,8</sup>,  
Wilson W.L. Li<sup>3</sup>, Hendrik-Jan Dieker<sup>4</sup>, Niels P. Riksen<sup>2,8</sup>, F.J. Anton Meijer<sup>5,10</sup>,  
Roy P.C. Kessels<sup>6,7</sup>, Nils Kohn<sup>9</sup>, Johannes G. van der Hoeven<sup>1,10</sup>, Peter Pickkers<sup>1,8</sup>,  
Mark Rijpkema<sup>5,10</sup>, Wilson F. Abdo<sup>1,8</sup>

\* shared first authorship

<sup>1</sup> Radboud university medical center, Department of Intensive Care Medicine, Nijmegen, The Netherlands.

<sup>2</sup> Radboud university medical center, Department of Internal Medicine, Nijmegen, The Netherlands

<sup>3</sup> Radboud university medical center, Department of Cardiothoracic Surgery, Nijmegen, The Netherlands

<sup>4</sup> Radboud university medical center, Department of Cardiology, Nijmegen, The Netherlands

<sup>5</sup> Radboud university medical center, Department of Medical Imaging, Nijmegen, The Netherlands

<sup>6</sup> Radboud university medical center, Department of Medical Psychology, Nijmegen, The Netherlands

<sup>7</sup> Radboud University, Donders Centre for Cognition, Nijmegen, The Netherlands

<sup>8</sup> Radboud university medical center, Radboud Institute for Molecular Life Sciences, Nijmegen, The Netherlands

<sup>9</sup> Radboud university medical center, Donders Institute for Brain, Cognition and Behaviour, Cognitive Neuroscience, Nijmegen, The Netherlands

<sup>10</sup> Radboud university medical center, Radboud Institute for Health Sciences, Nijmegen, The Netherlands

## **Corresponding author**

Dr. Wilson F. Abdo, MD, PhD

Department of Intensive Care Medicine, IP 707

Radboud university medical center

P.O. Box 9101

6500 HB Nijmegen

The Netherlands

**Phone:** +31 (0) 24 36 17273

**Email:** [f.abdo@radboudumc.nl](mailto:f.abdo@radboudumc.nl)

**Word count:** 3996

## ABSTRACT

### Introduction

Postoperative cognitive dysfunction (POCD) occurs frequently after coronary artery bypass grafting (CABG). The underlying mechanisms remain poorly understood, but neuroinflammation might play a pivotal role. We hypothesize that systemic inflammation induced by the surgical trauma could activate the innate immune (glial) cells of the brain. This could lead to an exaggerated neuroinflammatory cascade, resulting in neuronal dysfunction and loss of neuronal cells. Therefore, the aims of this study are to assess neuroinflammation *in vivo* pre- and post-surgery in patients undergoing major cardiac surgery and investigate whether there is a relationship of neuroinflammation to cognitive outcomes, changes to brain structure and function, and systemic inflammation.

### Methods and analysis

The FOCUS study is a prospective, single-centre observational study, including 30 patients undergoing elective on-pump CABG. Translocator protein (TSPO) PET neuroimaging will be performed pre- and postoperatively using the second generation tracer <sup>18</sup>F-DPA-714 to assess the neuroinflammatory response. In addition, a comprehensive cerebral MRI will be performed pre- and post-surgery, in order to discover newly developed brain and vascular wall lesions. Up to 6 months postoperatively, serial extensive neurocognitive assessments will be performed and blood will be obtained to quantify systemic inflammatory responses and peripheral immune cell activation.

### Ethics and dissemination

Patients do not benefit directly from engaging in the study, but imaging neuroinflammation is considered safe and no side effects are expected. The study protocol obtained ethical approval by the Medical Research Ethics Committee (MREC) region Arnhem-Nijmegen. This work will be published in peer-reviewed international medical journals and presented at medical conferences.

## Article summary

### Strengths and limitations of this study

- This study is the first to examine *in vivo* neuroinflammation using TSPO PET neuroimaging both prior to and after cardiac surgery
- This study combines state of the art neuroimaging with longitudinal neuropsychological examinations and detailed immunological analyses
- Extensive neuropsychological examinations at four different timepoints enable us to detect even subtle changes in cognitive function
- This study is powered to detect the association between neuroinflammation and cognitive decline between baseline and hospital discharge, when the incidence of cognitive dysfunction is highest.
- The power of this pilot study is inadequate to adjust for confounders.

### Keywords

Postoperative cognitive dysfunction (POCD), coronary artery bypass grafting (CABG), neuroinflammation, microglia, TSPO neuroimaging



## INTRODUCTION

### Background and rationale

Coronary artery bypass grafting (CABG) has been associated with postoperative cerebral complications.[1-4] These may occur directly post-surgery, like stroke or delirium, but can also have long-term sequelae such as postoperative cognitive dysfunction (POCD) and dementia. The incidence of POCD ranges from 20-70% in the first week after surgery, to 10-40% in the following months but may increase again from one postoperative year onwards.[1, 5] Furthermore, patients have a 1.7-fold increased risk to develop new incident Alzheimer's disease within six years after undergoing a CABG, compared to patients undergoing a percutaneous coronary intervention.[6]

Development of POCD is presumably related to perioperative brain hypoperfusion, cerebral microembolization, haemodilution, hypercoagulability, cerebral hyperthermia, and inadequate glucose homeostasis.[2] In addition, systemic inflammation is hypothesized as an important (and possibly treatable) factor for POCD pathogenesis.[7-9] Cardiac surgery produces substantial systemic inflammation (reflected by leucocytosis and significant dysregulation of cytokines and other inflammatory mediators, affecting various physical processes) due to multiple stimuli such as sternotomy, extracorporeal circulation (ECC), associated transient endotoxemia, and aortic cross-clamping. Systemic inflammation can result in increased communication and signalling from the periphery to the brain.[10, 11] As a result, systemic inflammation may induce activation of the innate immune cells of the brain, the microglia and astrocytes, leading to a neuroinflammatory response.[12] Animal models demonstrated that systemic administration of low-dose endotoxin even leads to long-term inflammatory reprogramming of microglia.[13] Interestingly, research has shown that neuroinflammation is associated with cognitive dysfunction and neurodegenerative disease.[14, 15] Given these associations, we hypothesize that occurrence of POCD in patients undergoing CABG is mediated through the occurrence of neuroinflammation.

Positron Emission Tomography (PET) enables the imaging of glial activation in the CNS using radiolabelled antagonists of translocator protein (TSPO).[16, 17] TSPO is mainly expressed as a transmembrane protein on mitochondria of microglia and astrocytes in the CNS.[18] As TSPO expression is upregulated during neuroinflammatory processes, it makes a promising biomarker for imaging neuroinflammation.[19] Up to now, TSPO neuroimaging has been applied in a wide variety of neurodegenerative and psychiatric conditions, showing associations between neuroinflammation and cognitive decline.[20-22] Recently, first *in vivo* evidence of microglial activity in response to systemic inflammation has been shown in patients and healthy volunteers.[23-25] However, human *in vivo* data on neuroinflammation in patients undergoing major cardiothoracic surgery are still lacking.

This study therefore aims to assess neuroinflammation pre- and post-surgery *in vivo* in patients undergoing elective cardiac surgery. Given the presumed association between neuroinflammation and cognitive decline, quantifying the extent of neuroinflammation post-surgery and its relation to POCD will provide us with important insights for future (interventional) research.

## Objectives

Our primary objective is to assess whether neuroinflammation is more pronounced in patients with cognitive decline at hospital discharge after CABG surgery, compared to patients without cognitive decline.

Secondary objectives:

1. To study the relation between the neuroinflammatory response and structural or functional changes to the brain postoperatively.
2. To study the relation between neuroinflammation and cognitive decline at 6 weeks and 6 months post-cardiac surgery.
3. To study the relation between neuroinflammation and postoperative delirium.
4. To study the relation between the perioperative systemic immune responses and neuroinflammation.

## METHODS AND ANALYSIS

### Study design

The FOCUS study (neuroinflammation in cognitive decline post cardiac surgery) is a single-centre observational time-series design study investigating neuroinflammation, systemic inflammation and neuropsychological performance before and after CABG.

### Study population and recruitment

All patients planned for elective CABG in an academic hospital in the Netherlands are screened. Table 1 presents the inclusion- and exclusion criteria. The age criterion of 50 years or older is chosen for two reasons. First, older adults are more prone to subsequent long-term cognitive decline after cardiac surgery.[26, 27] Second, ageing is associated with a more exaggerated neuroinflammatory response following systemic inflammation.[28]

Screening and enrolment logs will be maintained for all patients. After written informed consent is obtained, a blood sample will be genotyped for rs6971 polymorphism using Taqman analysis on a 7500 Fast Real-Time PCR System (ThermoFisher Scientific, Waltham, USA). Low-affinity TSPO binding patients for the radiotracer used in PET imaging will be excluded from participation. In our predominantly Caucasian cohort, the estimated percentage of low affinity binders is below 10%.[29]

### Data collection

Patients' demographics and information regarding their surgery indication, treatments, pre-existing comorbidity (Charlson Comorbidity Index),[30, 31] (re)admission, disease severity and mortality risk, length of mechanical ventilation, length of stay at the Intensive Care Unit

(ICU) and occurrence of delirium will be retrieved from the patients' medical files. Table 2 shows an overview of events for this study, which will be defined subsequently in more detail.

**Table 1. Inclusion and exclusion criteria**

| Inclusion criteria   |                                                                                                                                                                                                                                                                                                                                                                                                                                                                                                                                                                      |
|----------------------|----------------------------------------------------------------------------------------------------------------------------------------------------------------------------------------------------------------------------------------------------------------------------------------------------------------------------------------------------------------------------------------------------------------------------------------------------------------------------------------------------------------------------------------------------------------------|
|                      | <ul style="list-style-type: none"> <li>• Written informed consent</li> <li>• Age &gt;50 years</li> <li>• Planned for elective on-pump coronary artery bypass grafting surgery</li> <li>• High- or mixed-affinity binders based on rs6971 polymorphism for translocator protein (TSPO)</li> <li>• Pre-hospital use of statins</li> </ul>                                                                                                                                                                                                                              |
| Exclusion criteria   |                                                                                                                                                                                                                                                                                                                                                                                                                                                                                                                                                                      |
| <i>Neurological</i>  | <ul style="list-style-type: none"> <li>• Neurodegenerative disease, including mild cognitive impairment</li> <li>• Brain or spinal surgery within the last 6 months</li> <li>• Meningitis or brain infection within the last 6 months</li> <li>• Brain injury (e.g. acute stroke, or subarachnoid haemorrhage) within the last 6 months</li> <li>• Severe brain trauma in previous medical history</li> <li>• Presence of a cerebrospinal fluid catheter or shunt</li> <li>• Presence of a known brain tumour</li> <li>• Pre-hospital use of neuroleptics</li> </ul> |
| <i>Inflammatory</i>  | <ul style="list-style-type: none"> <li>• Active infection (defined as fever &gt;38.5°C or antibiotic treatment) within the last 2 weeks prior to surgery</li> <li>• Immunocompromised state (due to immunomodulatory drugs or underlying conditions)</li> <li>• Auto-immune or auto-inflammatory disease</li> </ul>                                                                                                                                                                                                                                                  |
| <i>Cardiological</i> | <ul style="list-style-type: none"> <li>• Previous cardiac surgery</li> <li>• Cardiovascular event within the last 3 months</li> </ul>                                                                                                                                                                                                                                                                                                                                                                                                                                |
| <i>Other</i>         | <ul style="list-style-type: none"> <li>• Contra-indication to undergo a PET/CT or MRI scan</li> <li>• Known contrast allergy for gadolinium</li> <li>• Kidney failure (defined by a MDRD-GFR &lt;15ml/min/1.73m<sup>2</sup>)</li> <li>• Illiteracy or the inability to speak Dutch</li> <li>• Presence of disabilities that prevent accurate delirium diagnosis</li> <li>• Low TSPO binding affinity (based on rs6971 polymorphism)</li> </ul>                                                                                                                       |

**Table 2. Schedule of events**

| Timing:                       | Pre-clinical | Pre-operative                      | CABG           | Postoperative         |                        |                      | Follow-up |           |
|-------------------------------|--------------|------------------------------------|----------------|-----------------------|------------------------|----------------------|-----------|-----------|
|                               |              | T0<br>Baseline                     | T1<br>Stop ECC | T2<br>Stop ECC<br>+6h | T3<br>Incision<br>+24h | T4<br>CABG<br>+ 3-7d | T5<br>6 w | T6<br>6 m |
| Inclusion/exclusion criteria  | X            |                                    |                |                       |                        |                      |           |           |
| Informed consent              | X            |                                    |                |                       |                        |                      |           |           |
| TSPO binding affinity         | X            |                                    |                |                       |                        |                      |           |           |
| PET/CT cerebrum               |              | X                                  |                |                       |                        | X                    |           |           |
| MRI cerebrum                  |              | X                                  |                |                       |                        | X                    |           |           |
| Blood sampling                |              | X                                  | X              | X                     | X                      | X                    | X         |           |
| Neuropsychological assessment |              | X                                  |                |                       |                        | X                    | X         | X         |
| Delirium assessment           |              | 3 times daily during hospital stay |                |                       |                        |                      |           |           |

CABG = coronary artery bypass grafting; ECC = extracorporeal circulation; h=hours, d=days, w=weeks, m=months, TSPO = translocator protein, PET/CT = positron emission tomography/computed tomography, MRI: magnetic resonance imaging.

### *Cerebral imaging*

Dynamic brain PET/CT scans will be obtained preoperatively and on the fourth (range: 3<sup>rd</sup>-7<sup>th</sup>) postoperative day. Dynamic imaging of the head will be performed for 60 minutes after intravenous injection of the radiolabelled TSPO antagonist <sup>18</sup>F-DPA-714, a second generation TSPO ligand. This generation of TSPO ligands outperforms the first generation TSPO tracer, isoquinoline carboxamide (<sup>11</sup>C-PK11195), on TSPO binding affinity and PET imaging properties, but requires polymorphism genotyping and stratifying according to binding affinity status.[32] A dose of ~200 MBq of <sup>18</sup>F-DPA-714 will be administered as a slow bolus injection during 40 seconds. Scans are obtained on a Siemens Biograph mCT hybrid PET/CT scanner (Siemens, Erlangen, Germany). A low-dose CT will be acquired for attenuation correction and anatomical reference. For pharmacokinetic analysis of the PET data arterial blood sampling will be used.

In addition, a 3 Tesla brain MRI (Siemens TIM TRIO, Erlangen, Germany) will be performed on the same days as the PET/CT scans. T1-weighted MR images will be obtained to co-register with the PET images for anatomical reference. Whole brain grey matter, as well as regions of interest will be delineated using probabilistic brain region templates. The slice thickness will be 1 mm. Additionally, the following MRI sequences will be performed: T2-weighted, susceptibility weighted imaging (SWI), FLAIR, diffusion tensor imaging (DTI), resting state fMRI, TOF MR angiogram of the circle of Willis and pre- and postcontrast 3D high-resolution T1-weighted SPACE sequence to visualize vessel wall abnormalities. In order to visualize cerebral vessel wall abnormalities, 0.1 mmol/kg gadobutrol (Gadovist) contrast agent will be administered intravenously. Details on MRI settings are provided in online supplementary appendix 1.

A senior neuroradiologist blinded to all other data will systematically quantify newly developed lesions post-surgery. This enables us to analyse the relationship between neuroinflammation, neuropsychological decline and cerebral lesion load. To evaluate changes in brain functional connectivity due to an acute immune response, a resting-state fMRI measurement is implemented comparing resting state connectivity in stress-related brain circuits pre- and post-surgery.[33, 34] A previous study found positive associations between alterations in resting-state functional connectivity in the brain's default mode network and global cognitive change after cardiac surgery[35], and the current study enables us to extend these findings by studying the relationship with (neuro)inflammation.

### *Blood sampling*

Blood samples will be obtained at baseline preoperatively (T0, concomitant with the PET-scan), intra-operatively at the stop of ECC (T1), 6 hours after stop ECC (T2) and 24 hours after incision (T3). The timing of blood draws is based on the peak of the systemic inflammatory response post-cardiac surgery, as shown in previous studies we performed in patients undergoing cardiac surgery.[36, 37] Additionally, blood samples will be collected concomitant with the second PET/CT-scan (T4) and six weeks postoperatively (T5) to explore to what extent the inflammatory response persists in time.

At all timepoints, common blood parameters will be measured, including haemoglobin, leucocyte and thrombocyte count, and circulating pro-and anti-inflammatory cytokines (including tumour necrosis factor alpha (TNF- $\alpha$ ), interleukin-6 (IL-6), interleukin-1 $\beta$  (IL-1 $\beta$ ), interleukin-10 (IL-10), and interleukin-1 receptor antagonist (IL-1RA)) by using simultaneous

Luminex assays. Blood will be centrifuged at 2000g for 10 minutes and the plasma will be stored at -80°C for possible future additional testing in line with the objective of this protocol. In addition, danger-associated molecular patterns (DAMPs, including high mobility group box 1 (HMGB1), heat shock protein-70 (HSP70), calgranulin-C (S100A12), calprotectin (S100A8/9), nuclear DNA, and mitochondrial DNA) will be measured as reported previously,[38] in plasma centrifuged for a second time at high speed (16000 g).

Additionally, *ex vivo* production of cytokines by stimulated isolated peripheral blood mononuclear cells (PBMCs) will be measured, including TNF- $\alpha$ , IL-6, IL-1 $\beta$ , monocyte chemoattractant protein-1 (MCP1) and IL-10. Flow cytometry analysis of whole blood will be performed as described previously,[39, 40] to study the inflammatory phenotype of the cells (including expression of human leukocyte antigen-DR (HLA-DR), C-C chemokine receptor type 2 (CCR2), CD11b, CD14, and CD16).

Arterial blood samples will be taken immediately before the <sup>18</sup>F-DPA-714 injection and during the PET-scan to measure the time course of radioactivity in plasma. In addition to this pharmacokinetic sampling, blood samples will be used to assess the ratio of <sup>18</sup>F-DPA-714 and its metabolites in order to correct the arterial input function for metabolite formation.

### *Neuropsychological assessment*

A trained psychologist will perform neuropsychological assessments preoperatively (T0), at hospital discharge (T4), after six weeks (T5) and six months (T6) follow-up. These assessments are in line with the recommendation for neuropsychological research in cardiac surgery patients.[41] Table 3 lists the full test battery used for the neuropsychological assessments as well as the self-report questionnaires. Tests were selected based on sensitivity to detect even subtle deterioration in cognitive performance, with a focus on the domains executive functioning, memory, speed of processing and language. We will use parallel versions of these tests to account for material-specific practice effects after repeated assessment.[42]

During hospitalisation, screening of delirium is standard of care. Confusion Assessment Method for the ICU (CAM-ICU)[43] or Delirium Observation Screening scores (DOS)[44, 45] at the cardiothoracic ward will be performed three times a day. A dedicated senior delirium researcher or neurologist will validate the diagnosis of delirium, using *DSM V criteria for delirium*. [46]

### *Cardiac surgery*

Perioperative care will be delivered according to the regular clinical protocol for CABG. This minimizes the risk of potential confounders due to variability in medical management.

**Table 3. Summary of neuropsychological testing**

| <i>Neuropsychological assessments</i>                                   |                                                                  |                                             |
|-------------------------------------------------------------------------|------------------------------------------------------------------|---------------------------------------------|
| <b>Test name</b>                                                        | <b>Domain</b>                                                    | <b>Subdomain</b>                            |
| <b><i>At timepoints T0</i></b>                                          |                                                                  |                                             |
| National Adult Reading Test – IQ[47]                                    | Premorbid intelligence (descriptive)                             | Estimation of pre-morbid intelligence level |
| <b><i>At timepoints T0, T4, T5, T6</i></b>                              |                                                                  |                                             |
| Trail Making Test B[48-50]                                              | Executive function                                               | Visual attention and task switching         |
| Stroop Colour-Word Test I, II, III[51]                                  | Executive function                                               | Susceptibility to interference              |
| Wechsler Adult Intelligence Scale-IV (WAIS) – Digit Span[52, 53]        | Executive function                                               | Working memory                              |
| Letter Digit Substitution Test (LDST)[54, 55]                           | Information processing speed                                     | Information processing speed                |
| Trail Making Test A[48-50]                                              | Information processing speed                                     | Information processing speed                |
| Rey Auditory Verbal Learning Test (RAVLT)[56, 57]                       | Episodic memory                                                  | Verbal episodic memory                      |
| Rey/Taylor Complex Figure Test –recall trials (RCFT)[58, 59]            | Episodic memory                                                  | Visual episodic memory                      |
| Rivermead Behavioural Memory Test-3 (RBMT-3), Face recognition[60]      | Episodic memory                                                  | Visual episodic memory                      |
| Rey/Taylor Complex Figure Test – copy trial (RCFT)[58, 59]              | Visuoconstructive ability                                        | Visuoconstructive ability                   |
| Letter Fluency Test (LFT)[61]                                           | Language                                                         | Semantic memory                             |
| Token Test (short form)[62]                                             | Language                                                         | Language comprehension                      |
| <i>Neuropsychological questionnaires</i>                                |                                                                  |                                             |
| <b>Test name</b>                                                        | <b>Assessment of</b>                                             |                                             |
| <b><i>At timepoints T0</i></b>                                          |                                                                  |                                             |
| Informant Questionnaire on Cognitive Decline in the Eldery (IQCODE)[63] | Subjective cognitive impairment, filled out by significant other |                                             |
| <b><i>At timepoints T0, T4, T5, T6</i></b>                              |                                                                  |                                             |
| Clinical Frailty Scale[64]                                              | Frailty screening                                                |                                             |
| RAND-36[65]                                                             | Health-related quality of life survey                            |                                             |
| Cognitive Failure Questionnaire (CFQ)[66]                               | Subjective cognitive complaints                                  |                                             |
| Hospital Anxiety and Depression Scale (HADS)[67]                        | Anxiety and depressive complaints                                |                                             |
| <b><i>At timepoints T4, T5, T6</i></b>                                  |                                                                  |                                             |
| Impact of Events Scale-Revised (IES-R)[68]                              | Distress caused by traumatic events                              |                                             |

## Data analysis

Pharmacokinetic modelling of dynamic PET data will be performed in PMOD software (PMOD Technologies LLC, Zürich, Switzerland). Binding potential ( $BP_{ND}$ ) and volume of distribution ( $V_T$ ) in several regions of interest (ROIs) will be determined using the 2-tissue compartmental model (2TCM) for each scan. Predefined ROIs include the frontal, temporal, parietal and occipital lobes, amygdala, hippocampus, thalamus, cerebellum and the brain stem.

For each patient,  $^{18}F$ -DPA-714  $BP_{ND}$  will be measured in the ROI for baseline and post-surgery PET scans. Since  $BP_{ND}$  is proportional to the availability of TSPO binding sites in the brain, an increase in  $BP_{ND}$  reflects an increase in glial activation. In addition, we will measure  $V_T$  which recently has been shown to mainly reflect changes in peripheral tracer binding during systemic inflammation, rather than changes in TSPO expression in the brain.[25][and unpublished data from our group] Therefore, both outcome measurements are required to validate these recent findings and assess glial activation accurately. Study investigators who analyse the cerebral imaging data will be blinded for inflammatory mediator results and cognitive outcomes.

No consensus about the definition of POCD has been achieved in the literature thus far.[5, 69, 70] At all timepoints, neuropsychological tests of our patients will be compared to available normative data, adjusted for age and educational level, resulting in standardized z-scores. Overall domain z-scores will be calculated by averaging the z-scores of the individual tests within a specific domain. Calculation of test performance will be supervised by an experienced clinical neuropsychologist. Additionally, z-scores of each individual test will be clinically classified as either being within the normal range (0), below average (1), or impaired (2), compared to the aforementioned normative data. "Normal performance" is defined as performance above -1 SD from the normative mean. "Below average" as between -1 SD and -1.65 SD from the normative mean (the lowest 16% of the normal population), and "impaired" as below -1.65 SD from the normative mean (the lowest 5% of the normal population).[71, 72] Thus, an overall weighted performance score will be calculated for all five cognitive domains. A cognitive domain will be clinically classified as *impaired* when the average weighted score of all tests within the domain is  $>1$ . We will define the presence of POCD when 1) patients are *impaired* in one or more domains at hospital discharge, compared to baseline, or 2) when the overall weighted performance score deteriorated (from classification score 0 or 1 to 1 or 2, respectively) in more than one domain at hospital discharge compared to baseline. Accordingly, all patients will be dichotomized into two groups: with or without POCD at hospital discharge.

The percentage change in TSPO expression (postoperative versus preoperative) will be calculated and reported as mean  $\pm$  standard error of the mean (SEM) if normally distributed. This value can be compared using unpaired t-tests between both groups with Bonferroni post-hoc correction, and additionally, linear mixed models will be performed with the presence of POCD and brain region modelled as fixed effects, and subject ID as random effect. Additionally, the (change in) mean of the cognitive domain scores is analysed as continuous dependent outcome, with (change in) TSPO expression and (change in) systemic inflammatory markers as predictors in multiple linear regression models. Age, sex, Clinical Frailty Scale, Charlson Comorbidity Index, Hospital Anxiety and Depression Scale (HADS), and the RAND-36 item health survey at inclusion can be included as covariates. Multiple logistic regression analysis is performed to correct for possible confounders such as newly developed structural brain lesions on MRI.

1  
2  
3 The trajectory of systemic inflammatory parameters and differences in timepoints will be  
4 measured with repeated measures one-way ANOVA or linear mixed models in case of missings.  
5 In addition, correlations between systemic inflammatory markers and TSPO expression will be  
6 studied using Pearson for parametric or Spearman for non-parametric data. Unpaired t-tests will  
7 be applied to compare TSPO expression between patients with and without a delirious episode  
8 during hospital admission.  
9

10 All MRI images will be evaluated without prior notice of any clinical parameter. White matter  
11 lesions are defined as hyperintense lesions on FLAIR MRI without corresponding cerebrospinal  
12 fluid like hypo-intense lesions on the T1 weighted image. Lacunar infarcts are defined as hypo-  
13 intense areas  $>2\text{mm}$  and  $\leq 15\text{mm}$  on FLAIR and T1.[73] Territorial infarcts are defined as  
14 hyperintense lesions on FLAIR, and hypointense lesions on T1 image.[73] And finally,  
15 microbleeds are defined as small, homogenous, round foci of low signal intensity on T2\*  
16 weighted images of  $<10\text{mm}$  in diameter.[74]

17 Analyses of functional and structural brain images will be performed using FSL (FMRIB's  
18 Software Library, Oxford, United Kingdom).[75] After pre-processing and denoising, subject-  
19 wise spatial maps of within network brain connectivity of the salience, executive control and  
20 default mode networks will be compared with non-parametric tests for mean differences.  
21 Vascular wall enhancement will be compared between the preoperative and postoperative  
22 assessments with paired t-tests or the Wilcoxon signed rank test if the data are non-parametric.  
23

24 Descriptive statistics will be performed using IBM-SPSS software. Mean ( $\pm\text{SEM}$ ) or median  
25 (IQR) will be presented depending on the distribution of the data. Alpha will be set at 0.05  
26 throughout.  
27

28 After the first 5 patients we will schedule a technical interim analysis to establish whether a  
29 tissue reference model is a reliable, non-invasive method for pharmacokinetic analysis of TSPO  
30 neuroimaging during systemic inflammation-induced neuroinflammation. If this or other  
31 (mathematical) methods can be reliably validated in our cohort, there will be no longer need for  
32 arterial blood sampling.  
33  
34  
35  
36  
37  
38

### 39 **Sample size calculation**

40 No data on the degree of glial activation after systemic inflammatory responses in post-cardiac  
41 surgery patients are available. Research on cognitive dysfunction after cardiac surgery estimates  
42 a prevalence of approximately 50% at hospital discharge.[1, 5, 69] Therefore, we will define  
43 two groups based on the presence or absence of cognitive dysfunction at hospital discharge.  
44  
45

46 Previous studies in dementia patients observed a 15-35% higher PET tracer uptake in patients  
47 with cognitive impairment compared to healthy controls, with a standard deviation of 30%.[76,  
48 77] Therefore, we assume that patients with cognitive dysfunction at hospital discharge after  
49 cardiac surgery will have a 30% higher delta tracer uptake compared to patients without  
50 cognitive decline. To assess a 30% higher delta tracer uptake in patients with cognitive  
51 dysfunction, an unpaired two-sample t-test results in 13 patients per group with a power of 80%  
52 and a one-sided alpha of 0.05. In order to account for lower increments we will include 15  
53 patients per group resulting in a power of 85% with an alpha of 0.05 to differentiate an increase  
54 of 30% in delta tracer uptake. Consequently, we will include a total of 30 patients, assuming  
55 that 50% will have cognitive decline at hospital discharge. The investigator can decide to  
56 withdraw a subject from the study for a) urgent medical reasons, or b) if a protocol violation  
57 occurs or c) if the subject is lost to follow-up. Replacement of individuals will not be necessary  
58  
59  
60



1  
2  
3 in this observational cohort once both PET scans are performed (i.e. primary objective has been  
4 met).

5  
6 Sample size calculations were conducted for the primary objective solely, considering cognitive  
7 decline at hospital discharge. Assessment of long-term cognitive outcomes (up to 6 months)  
8 together with assessment of our secondary outcomes has been set up in an exploratory setting.  
9 The data of this study will be important to calculate the power and feasibility of a subsequent  
10 prospective project focussed on long-term outcomes.  
11  
12

### 13 14 **Interim analysis with futility stop**

15  
16 An interim analysis will be performed after the first 15 subjects to validate that CABG surgery  
17 indeed induces a neuroinflammatory response, which will be assessed by TSPO PET imaging.  
18 An independent data safety and monitoring board (DSMB), composed by two clinical experts  
19 in the field of nuclear medicine and neurology, and a biostatistician, will analyse whether  
20 increased PET tracer uptake is observed after CABG surgery compared to the preoperative  
21 baseline tracer uptake. If no trend towards a significant difference ( $p > 0.10$ ) will be observed,  
22 the inclusion will be stopped to prevent futility. Furthermore an adaptive power analysis will  
23 be performed by the unblinded statistician DSMB member during the interim analysis to  
24 determine whether the study is underpowered to fulfil the primary objective, and whether the  
25 sample size should be adapted. The pooled standard deviation (SD) of the delta PET tracer  
26 uptake will be calculated from the first 15 patients of which approximately 50% have cognitive  
27 disorders at hospital discharge. Using this pooled SD the sample size calculation will be  
28 performed again. If the ratio between this new sample size and the original is greater than 1, the  
29 sample size will be adapted if deemed feasible. The investigators will remain blinded for  
30 cognitive outcomes until the end of the study.  
31  
32  
33  
34  
35

### 36 37 **Study period**

38 The study started enrolling patients in March 2019. The estimated study enrolment completion  
39 date is anticipated in the beginning of 2022. Please note that this manuscript was finalised prior  
40 to the interim analyses.  
41  
42  
43  
44  
45

### 46 47 **Ethics and dissemination**

48 The study is conducted according to the principles of the Declaration of Helsinki and in  
49 accordance with the Dutch Medical Research Involving Human Subjects Act (WMO) and Good  
50 Clinical Practice guidelines. The study obtained ethical approval by the  
51 Medical Research Ethics Committee (MREC) region Arnhem-Nijmegen (CMO 2016-2598).  
52 The study is registered in the ClinicalTrials.gov database (NCT 04520802). The burden of the  
53 study protocol consists of two PET/CT-scans and two cerebral MRIs, additional blood sampling  
54 before, during and after surgery and four neuropsychological examinations, two during hospital  
55 admission and two follow-up visits during the first 6 months after hospital discharge.  
56  
57  
58  
59  
60

### **Patient and public involvement statement**

11

1  
2  
3 The hypothesis of this study was conceived with the help of patients through outpatient clinical  
4 follow-up after an ICU admission. Through patient experience of different long-term  
5 consequences, this study's endpoints involves cognitive performance, psychological symptoms  
6 and quality of life. A patient member of the MREC judged the study protocol for feasibility,  
7 burden and understandability of patient information.  
8  
9

### 10 **Data management**

11  
12 Data will be handled confidentially and pseudonymously. Study data will be de-identified and  
13 a secured subject identification code list will be kept and stored separately from the data. This  
14 observational study uses an electronic remote data capture system. All missing and ambiguous  
15 data will be queried. The investigator will permit study-related monitoring, audits and  
16 regulatory inspection at their site, providing access to source data/documents. In all cases, it  
17 remains the responsibility of the investigator to ensure that data are accurate. Coded data will  
18 be kept after closure of the study and can only be used for ancillary studies after strict approval  
19 of the principal investigator. Anonymized data can be shared with other organizations for  
20 academic research, consensus development or other projects aimed at advancement of  
21 knowledge in this area. Body materials consisting of blood will be preserved in a coded form  
22 for 10 years for possible follow-up studies. The MREC will be consulted before body material  
23 is used for follow-up research.  
24  
25  
26  
27  
28

### 29 **Public disclosure and publication policy**

30  
31 The results of this study will be published, regardless of whether these are positive, negative or  
32 inconclusive, in peer-reviewed international (open access) medical journals and presented at  
33 medical conferences. In addition, a summary of the results of this study will be published on  
34 the website of the funding agency The Netherlands Organization for Health Research and  
35 Development (ZonMw).  
36  
37  
38

### 39 **Relevance of findings**

40  
41 Cerebral dysfunction after cardiac surgery occurs frequently and may severely affect patients'  
42 daily lives. Due to the lack of research data within this area, the pathophysiology of cerebral  
43 dysfunction post-surgery is unknown. Therefore, there are currently no interventions available  
44 to prevent or treat this deterioration. The FOCUS study will quantify glial activation, which is  
45 suggested to be important in this pathophysiology, and relate this to cognition, structural and  
46 functional changes to the brain and systemic inflammation. This adds to previous and ongoing  
47 observational work perioperatively combining blood and cerebrospinal fluid parameters with  
48 MR neuroimaging, cognition and electroencephalogram recordings.[78, 79] Our study  
49 combines state of the art molecular and MR neuroimaging techniques, elaborates longitudinal  
50 neuropsychological examinations, and comprehensive immunological laboratory tests.  
51 Objective neurocognitive examinations will be performed at four different timepoints, up to six  
52 months postoperatively, enabling us to detect even subtle changes in cognition. Better  
53 understanding of the pathogenesis of POCD could direct neuroscientists towards the  
54 development of targets for future interventions. This imaging paradigm could provide an  
55 approach to examine the efficacy of such interventions in clinical studies.  
56  
57  
58  
59  
60

1  
2  
3 In addition, the knowledge obtained with this study is of importance for patients and healthcare  
4 professionals as well. The participating patient will not directly benefit from study participation.  
5 However, they will be followed with regard to possible complaints in light of potential post-  
6 cardiac surgery cerebral dysfunction. This will increase the awareness of the participating  
7 patients and caregivers with respect to such complaints. This might benefit the patient and  
8 caregivers as it will decrease uncertainty about the nature of the complaints when they occur.  
9 Furthermore this study searches for a biological explanation for post-surgery cerebral  
10 complaints which are often not understood or classified as functional.  
11  
12

13 Several limitations need to be addressed. First, as this study is powered at cognitive decline at  
14 hospital discharge, it is not powered to study the association between glial activation and  
15 cognitive decline after 6 months. The second limitation concerns the arterial sampling during  
16 the dynamic PET-scans. Automated arterial sampling, which is frequently used in other studies  
17 using outpatient clinic patients, leads to a significant loss of blood per scan. Loss of such an  
18 amount of blood in cardiac surgery patients is not preferable as it could result in a significant  
19 health risk for these critically ill patients. Therefore we will sample manually, which reduces  
20 blood volume loss. Manual sampling results in less sampling points and could therefore lead to  
21 a slightly less accurate plasma activity curve. Unfortunately, TSPO expression is not specific  
22 to microglia and astrocytes, and the measured PET signal can be affected by recruitment of  
23 peripheral monocytes to the brain, adherence of circulating leukocytes to the vascular  
24 epithelium, or TSPO expression in neurons or vascular endothelial cells. Finally, the power of  
25 this pilot study is inadequate to allow adjustment for all potential confounding factors.  
26  
27  
28  
29

30 Imaging neuroinflammation as proposed is safe, as corroborated by existing human and animal  
31 data. In addition, imaging neuroinflammation could lead to potential prognostic and  
32 interventional targets that could revolutionize healthcare for this large group of patients.  
33  
34  
35  
36  
37  
38  
39  
40  
41  
42  
43  
44  
45  
46  
47  
48  
49  
50  
51  
52  
53  
54  
55  
56  
57  
58  
59  
60

## References

1. Greaves, D., et al., *Cognitive outcomes following coronary artery bypass grafting: A systematic review and meta-analysis of 91,829 patients*. Int J Cardiol, 2019. **289**: p. 43-49.
2. Berger, M., et al., *Neurocognitive Function after Cardiac Surgery: From Phenotypes to Mechanisms*. Anesthesiology, 2018. **129**(4): p. 829-851.
3. Brown, C.H.t., et al., *Cognitive Decline after Delirium in Patients Undergoing Cardiac Surgery*. Anesthesiology, 2018. **129**(3): p. 406-416.
4. Sauer, A.C., et al., *Association between delirium and cognitive change after cardiac surgery*. Br J Anaesth, 2017. **119**(2): p. 308-315.
5. Bruce, K., et al., *The impact of cardiac surgery on cognition*. Stress and Health, 2008. **24**(3): p. 249-266.
6. Lee, T.A., et al., *Assessment of the emergence of Alzheimer's disease following coronary artery bypass graft surgery or percutaneous transluminal coronary angioplasty*. Journal of Alzheimer's Disease, 2005. **7**(4): p. 319-324.
7. Wan, Y., et al., *Postoperative impairment of cognitive function in rats: a possible role for cytokine-mediated inflammation in the hippocampus*. Anesthesiology, 2007. **106**(3): p. 436-43.
8. Cibelli, M., et al., *Role of interleukin-1beta in postoperative cognitive dysfunction*. Ann Neurol, 2010. **68**(3): p. 360-8.
9. Cao, X.Z., et al., *Postoperative cognitive deficits and neuroinflammation in the hippocampus triggered by surgical trauma are exacerbated in aged rats*. Prog Neuropsychopharmacol Biol Psychiatry, 2010. **34**(8): p. 1426-32.
10. Varatharaj, A. and I. Galea, *The blood-brain barrier in systemic inflammation*. Brain, Behavior, and Immunity, 2017. **60**: p. 1-12.
11. D'Mello, C. and M.G. Swain, *Immune-to-Brain Communication Pathways in Inflammation-Associated Sickness and Depression*. Curr Top Behav Neurosci, 2017. **31**: p. 73-94.
12. Perry, V.H. and C. Holmes, *Microglial priming in neurodegenerative disease*. Nat Rev Neurol, 2014. **10**(4): p. 217-24.
13. Wendeln, A.C., et al., *Innate immune memory in the brain shapes neurological disease hallmarks*. Nature, 2018. **556**(7701): p. 332-338.
14. Dheen, S.T., C. Kaur, and E.A. Ling, *Microglial activation and its implications in the brain diseases*. Curr Med Chem, 2007. **14**(11): p. 1189-97.
15. Streit, W.J., R.E. Mrazek, and W.S. Griffin, *Microglia and neuroinflammation: a pathological perspective*. J Neuroinflammation, 2004. **1**(1): p. 14.
16. Turkheimer, F.E., et al., *The methodology of TSPO imaging with positron emission tomography*. Biochem Soc Trans, 2015. **43**(4): p. 586-92.
17. Song, Y.S., *Perspectives in TSPO PET Imaging for Neurologic Diseases*. Nucl Med Mol Imaging, 2019. **53**(6): p. 382-385.
18. Casellas, P., *Peripheral benzodiazepine receptors and mitochondrial function*. Neurochemistry International, 2002. **40**(6): p. 475-486.
19. Lee, Y., et al., *Translocator protein (TSPO): the new story of the old protein in neuroinflammation*. BMB Rep, 2020. **53**(1): p. 20-27.
20. Bradburn, S., C. Murgatroyd, and N. Ray, *Neuroinflammation in mild cognitive impairment and Alzheimer's disease: A meta-analysis*. Ageing Res Rev, 2019. **50**: p. 1-8.
21. Plavén-Sigray, P., et al., *Positron Emission Tomography Studies of the Glial Cell Marker Translocator Protein in Patients With Psychosis: A Meta-analysis Using Individual Participant Data*. Biol Psychiatry, 2018. **84**(6): p. 433-442.
22. Enache, D., C.M. Pariante, and V. Mondelli, *Markers of central inflammation in major depressive disorder: A systematic review and meta-analysis of studies examining cerebrospinal fluid, positron emission tomography and post-mortem brain tissue*. Brain Behav Immun, 2019. **81**: p. 24-40.
23. Sandiego, C.M., et al., *Imaging robust microglial activation after lipopolysaccharide administration in humans with PET*. Proc Natl Acad Sci U S A, 2015. **112**(40): p. 12468-73.

- 1
- 2
- 3 24. Forsberg, A., et al., *The immune response of the human brain to abdominal surgery*. Ann Neurol, 2017. **81**(4): p. 572-582.
- 4
- 5 25. Nettis, M.A., et al., *PET imaging shows no changes in TSPO brain density after IFN-alpha immune challenge in healthy human volunteers*. Transl Psychiatry, 2020. **10**(1): p. 89.
- 6
- 7 26. Newman, M.F., et al., *Longitudinal assessment of neurocognitive function after coronary-artery bypass surgery*. N Engl J Med, 2001. **344**(6): p. 395-402.
- 8
- 9 27. Glumac, S., G. Kardum, and N. Karanovic, *Postoperative Cognitive Decline After Cardiac Surgery: A Narrative Review of Current Knowledge in 2019*. Med Sci Monit, 2019. **25**: p. 3262-3270.
- 10
- 11
- 12 28. Norden, D.M. and J.P. Godbout, *Review: microglia of the aged brain: primed to be activated and resistant to regulation*. Neuropathol Appl Neurobiol, 2013. **39**(1): p. 19-34.
- 13
- 14 29. Owen, D.R., et al., *An 18-kDa translocator protein (TSPO) polymorphism explains differences in binding affinity of the PET radioligand PBR28*. J Cereb Blood Flow Metab, 2012. **32**(1): p. 1-5.
- 15
- 16
- 17 30. Charlson, M.E., et al., *A new method of classifying prognostic comorbidity in longitudinal studies: development and validation*. J Chronic Dis, 1987. **40**(5): p. 373-83.
- 18
- 19 31. Quan, H., et al., *Updating and validating the Charlson comorbidity index and score for risk adjustment in hospital discharge abstracts using data from 6 countries*. Am J Epidemiol, 2011. **173**(6): p. 676-82.
- 20
- 21
- 22 32. Owen, D.R., et al., *Mixed-affinity binding in humans with 18-kDa translocator protein ligands*. J Nucl Med, 2011. **52**(1): p. 24-32.
- 23
- 24 33. Hermans, E.J., et al., *Dynamic adaptation of large-scale brain networks in response to acute stressors*. Trends Neurosci, 2014. **37**(6): p. 304-14.
- 25
- 26 34. Kohn, N., E.J. Hermans, and G. Fernández, *Cognitive benefit and cost of acute stress is differentially modulated by individual brain state*. Soc Cogn Affect Neurosci, 2017. **12**(7): p. 1179-1187.
- 27
- 28
- 29 35. Browndyke, J.N., et al., *Resting-State Functional Connectivity and Cognition After Major Cardiac Surgery in Older Adults without Preoperative Cognitive Impairment: Preliminary Findings*. J Am Geriatr Soc, 2017. **65**(1): p. e6-e12.
- 30
- 31
- 32 36. Hoedemaekers, C., et al., *The complement system is activated in a biphasic pattern after coronary artery bypass grafting*. Ann Thorac Surg, 2010. **89**(3): p. 710-6.
- 33
- 34 37. Hoedemaekers, C.W., et al., *Intensive insulin therapy does not alter the inflammatory response in patients undergoing coronary artery bypass grafting: a randomized controlled trial [ISRCTN95608630]*. Crit Care, 2005. **9**(6): p. R790-7.
- 35
- 36
- 37 38. Leijte, G.P., et al., *Increased Plasma Levels of Danger-Associated Molecular Patterns Are Associated With Immune Suppression and Postoperative Infections in Patients Undergoing Cytoreductive Surgery and Hyperthermic Intraperitoneal Chemotherapy*. Front Immunol, 2018. **9**: p. 663.
- 38
- 39
- 40 39. Noz, M.P., et al., *Sixteen-Week Physical Activity Intervention in Subjects With Increased Cardiometabolic Risk Shifts Innate Immune Function Towards a Less Proinflammatory State*. J Am Heart Assoc, 2019. **8**(21): p. e013764.
- 41
- 42 40. Leijte, G.P., et al., *Monocytic HLA-DR expression kinetics in septic shock patients with different pathogens, sites of infection and adverse outcomes*. Critical Care, 2020. **24**(1): p. 110.
- 43
- 44
- 45 41. Murkin, J.M., et al., *Statement of consensus on assessment of neurobehavioral outcomes after cardiac surgery*. Ann Thorac Surg, 1995. **59**(5): p. 1289-95.
- 46
- 47 42. Beglinger, L.J., et al., *Practice effects and the use of alternate forms in serial neuropsychological testing*. Arch Clin Neuropsychol, 2005. **20**(4): p. 517-29.
- 48
- 49 43. Ely, E.W., et al., *Evaluation of delirium in critically ill patients: validation of the Confusion Assessment Method for the Intensive Care Unit (CAM-ICU)*. Crit Care Med, 2001. **29**(7): p. 1370-9.
- 50
- 51 44. Schuurmans, M., et al., *Delirium case finding: pilot testing of a new screening scale for nurses*. Journal of the American Geriatrics Society, 2002. **50**.
- 52
- 53 45. Schuurmans, M.J., L.M. Shortridge-Baggett, and S.A. Duursma, *The Delirium Observation Screening Scale: a screening instrument for delirium*. Res Theory Nurs Pract, 2003. **17**(1): p. 31-50.
- 54
- 55
- 56
- 57
- 58
- 59
- 60

- 1
- 2
- 3 46. American Psychiatric Association, *Diagnostic and Statistical Manual of Mental Disorders, 5th Edition*. 2013, Arlington, VA. .
- 4
- 5 47. Nelson, H.E. and A. O'Connell, *Dementia: the estimation of premorbid intelligence levels using the New Adult Reading Test*. *Cortex*, 1978. **14**(2): p. 234-44.
- 6
- 7 48. Partington, J.E. and R.G. Leiter, *Partington's Pathways Test*. *Psychological Service Center Journal*, 1949. **1**: p. 11-20.
- 8
- 9 49. Reitan, R.M. and D. Wolfson, *The Halstead-Reitan Neuropsychological Test Battery*. 1985, Tuscon, AZ: Neuropsychological Press.
- 10
- 11 50. Larrabee, G.J., S.R. Millis, and J.E. Meyers, *Sensitivity to Brain Dysfunction of the Halstead-Reitan vs an Ability-Focused Neuropsychological Battery*. *The Clinical Neuropsychologist*, 2008. **22**(5): p. 813-825.
- 12
- 13 51. Stroop, J.R., *Studies of interference in serial verbal reactions*. *Journal of Experimental Psychology*, 1935. **18**(6): p. 643-662.
- 14
- 15 52. Kessels, R.P.C., P.W. Molleman, and J.M. Oosterman, *Assessment of working-memory deficits in patients with mild cognitive impairment and Alzheimer's dementia using Wechsler's Working Memory Index*. *Aging Clinical and Experimental Research*, 2011. **23**(5): p. 487-490.
- 16
- 17 53. Wechsler, D., *Wechsler Adult Intelligence Scale-Fourth edition-Nederlandse bewerking. Technische handleiding en Afname en scorehandleiding*. 2012, Amsterdam: Pearson Assessment and Information BV.
- 18
- 19 54. Natu, M.V. and A.K. Agarwal, *Digit letter substitution test (DLST) as an alternative to digit symbol substitution test (DSST)*. *Human Psychopharmacology: Clinical and Experimental*, 1995. **10**(4): p. 339-343.
- 20
- 21 55. Jolles J; Houx P.J.; van Boxtel M.P.J., e.a., *The maastricht aging study: Determinants of cognitive aging*. 1995, Maastricht: Neuropsych Publishers.
- 22
- 23 56. Schmidt, M., *Rey auditory verbal learning test: Ravlt: A handbook*. 1996: Western Psychological Services.
- 24
- 25 57. Saan, R.J. and B.G. Deelman, *De 15-woordentest A en B*. 1986, Groningen: Afdeling Neuropsychologie, AZG.
- 26
- 27 58. Rey, A., *Psychological examination of traumatic encephalopathy*. *Clinical Neuropsychologist*, 1993. **7**(1): p. 3-21.
- 28
- 29 59. Meyers, J.E., Meyers, K.R., *Rey complex figure test and recognition trial: Professional manual*. . 1995, Odessa: Psychological Assessment Resources.
- 30
- 31 60. Wilson, B., J. Cockburn, and A. Baddeley, *The Rivermead behavioural memory test manual*. . 1985, Bury St Edmunds: Thames Valley Test Co.
- 32
- 33 61. Mulder, J.L.D., P.H.; Dekker, R., *Word-fluency test/figure fluency test (wft/fft)*. . 2006, Leiden: PITS Uitgeverij BV.
- 34
- 35 62. De Renzi, E. and P. Faglioni, *Normative data and screening power of a shortened version of the Token Test*. *Cortex*, 1978. **14**(1): p. 41-9.
- 36
- 37 63. Jorm, A.F. and P.A. Jacomb, *The Informant Questionnaire on Cognitive Decline in the Elderly (IQCODE): socio-demographic correlates, reliability, validity and some norms*. *Psychol Med*, 1989. **19**(4): p. 1015-22.
- 38
- 39 64. Rockwood, K., et al., *A global clinical measure of fitness and frailty in elderly people*. *Cmaj*, 2005. **173**(5): p. 489-95.
- 40
- 41 65. Hays, R.D., C.D. Sherbourne, and R.M. Mazel, *The RAND 36-Item Health Survey 1.0*. *Health Econ*, 1993. **2**(3): p. 217-27.
- 42
- 43 66. Broadbent, D.E., et al., *The Cognitive Failures Questionnaire (CFQ) and its correlates*. *Br J Clin Psychol*, 1982. **21**(1): p. 1-16.
- 44
- 45 67. Spinhoven, P., et al., *A validation study of the Hospital Anxiety and Depression Scale (HADS) in different groups of Dutch subjects*. *Psychol Med*, 1997. **27**(2): p. 363-70.
- 46
- 47 68. Creamer, M., R. Bell, and S. Failla, *Psychometric properties of the Impact of Event Scale - Revised*. *Behav Res Ther*, 2003. **41**(12): p. 1489-96.
- 48
- 49 69. Rudolph, J.L., et al., *Measurement of post-operative cognitive dysfunction after cardiac surgery: a systematic review*. *Acta Anaesthesiol Scand*, 2010. **54**(6): p. 663-77.
- 50
- 51 70. Needham, M.J., C.E. Webb, and D.C. Bryden, *Postoperative cognitive dysfunction and dementia: what we need to know and do*. *Br J Anaesth*, 2017. **119**(suppl\_1): p. i115-i125.
- 52
- 53
- 54
- 55
- 56
- 57
- 58
- 59
- 60

- 1  
2  
3 71. van den Berg, E., et al., *Mild impairments in cognition in patients with type 2 diabetes mellitus: the use of the concepts MCI and CIND*. Journal of Neurology, Neurosurgery & Psychiatry, 2005. **76**(10): p. 1466-1467.
- 4  
5  
6 72. Reukers, D.F.M., et al., *Objective cognitive performance and subjective complaints in patients with chronic Q fever or Q fever fatigue syndrome*. BMC Infectious Diseases, 2020. **20**(1): p. 397.
- 7  
8  
9 73. Hervé, D., et al., *Shape and volume of lacunar infarcts: a 3D MRI study in cerebral autosomal dominant arteriopathy with subcortical infarcts and leukoencephalopathy*. Stroke, 2005. **36**(11): p. 2384-8.
- 10  
11  
12 74. Ashburner, J. and K.J. Friston, *Unified segmentation*. Neuroimage, 2005. **26**(3): p. 839-51.
- 13  
14 75. Jenkinson, M., et al., *FSL*. Neuroimage, 2012. **62**(2): p. 782-90.
- 15  
16 76. Suridjan, I., et al., *In-vivo imaging of grey and white matter neuroinflammation in Alzheimer's disease: a positron emission tomography study with a novel radioligand, [18F]-FEPPA*. Mol Psychiatry, 2015. **20**(12): p. 1579-87.
- 17  
18 77. Varrone, A., et al., *Positron emission tomography imaging of the 18-kDa translocator protein (TSPO) with [18F]FEMPA in Alzheimer's disease patients and control subjects*. Eur J Nucl Med Mol Imaging, 2015. **42**(3): p. 438-46.
- 19  
20  
21 78. Berger, M., et al., *The INTUIT Study: Investigating Neuroinflammation Underlying Postoperative Cognitive Dysfunction*. J Am Geriatr Soc, 2019. **67**(4): p. 794-798.
- 22  
23 79. Danielson, M., et al., *Neuroinflammatory markers associate with cognitive decline after major surgery: Findings of an explorative study*. Ann Neurol, 2020. **87**(3): p. 370-382.
- 24  
25  
26  
27  
28  
29  
30  
31  
32  
33  
34  
35  
36  
37  
38  
39  
40  
41  
42  
43  
44  
45  
46  
47  
48  
49  
50  
51  
52  
53  
54  
55  
56  
57  
58  
59  
60

### **Acknowledgements:**

The authors are very grateful for the help of our colleagues at the department of Radiology and Nuclear Medicine, especially Gerben Franssen, Desirée Bos, Peter Laverman, Jurrian Butter, Peter Kok, Maichel van Riel, Michel de Groot, Marijke Hogenkamp, and Judith Thijssen. In addition, we wish to thank Petra Budde, Jacqueline Blaauwbroek, and Tanja Derks from the cardiothoracic planning office, for their help and flexibility in scheduling study patients. Assistance provided by the psychologists Chiara Fasotti, Claudette van Roij, Maud van Dorst, and Lizzy van der Horst in performing the neuropsychological examinations was greatly appreciated. Furthermore we wish to thank Jelle Gerretsen and Matthijs Kox from the Intensive Care Research Unit for their input in the immunological assays in this study. Finally, this study could not be conducted without the help of the cardiothoracic surgeons, anaesthesiologists, intensivists, and ICU nurses.

### **Contributors:**

WFA conceived the study idea. APvT and WFA developed the study design to which JvT, WL, HJD, NPR, FJAM, RPCK, NK, JvdH, PP and MR contributed. APvT and HBD drafted the manuscript. All authors were involved in the editing of the manuscript and read and approved the final manuscript.

### **Funding:**

WFA and this study were supported by a research grant from the Netherlands Organization for Health Research and Development (ZonMW Clinical Fellowship grant 90715610). This funding agency had no role in the concept, design or writing of this study.

**Competing interests:** None declared.



## Supplemental material to:

A.M. Peters van Ton et al.,  
*Neuroinflammation in cognitive decline post-cardiac surgery  
 (the FOCUS study): an observational study protocol*

### Appendix 1: MRI scan protocol – parameter settings

|                                                                     | Protocol Name | Sequence/Contrast parameters                                      | Resolution(mm)<br>Matrix Size<br>Parallel Imaging | Duration (min:secs) |
|---------------------------------------------------------------------|---------------|-------------------------------------------------------------------|---------------------------------------------------|---------------------|
| <b>T1-weighted MPRAGE</b>                                           | MPRAGE        | TR/TI/TE=2300/900/2.32ms<br>Flip angle=8°                         | 0.9x0.9x0.9mm<br>240x240x192<br>iPAT=2            | 5:21                |
| <b>T2-weighted TSE TRA</b>                                          | T2_tse_tra    | TR/TE=3500/92 ms<br>Flip angle = 120 °                            | 0.4x0.4x5mm<br>230x173x154                        | 2:01                |
| <b>Susceptibility weighted</b>                                      | F13D_SWI      | TR/TE=27/20ms<br>Flip angle = 15°                                 | 1x1x3mm<br>250x188x156<br>iPAT=2                  | 2:43                |
| <b>FLAIR</b>                                                        | T2_flair      | TR/TI/TE=9000/87/2500ms<br>Flip angle=150°                        | 0.6x0.6x5mm<br>230x173x143                        | 4:32                |
| <b>Fieldmap</b>                                                     | Gre_field     | TR/TE1/TE2=400/5.19/7.65<br>Flip angle= 60°                       | 3.8x3.8x3mm<br>240x240x135                        | 0:54                |
| <b>DTI</b>                                                          | MDDW64        | TR/TE=6900/67<br>Directions=108<br>b-value=1000 s/mm <sup>2</sup> | 2x2x2mm<br>240x240x128<br>iPAT=2                  | 12:47               |
| <b>fMRI</b>                                                         | Ep2d          | TR/TE=2390/30ms<br>Flip angle= 90°                                | 3.5x3.5x3.5<br>224x224x144                        | 6:06                |
| <b>TOF MR angiogram</b>                                             | ToF           | TR/TE=24/3.93ms<br>Flip angle= 15°                                | 0.5x0.5x0.6mm<br>200x150x154<br>iPAT=2            | 11:10               |
| <b>T1-weighted SPACE</b><br><i>pre-contrast &amp; post-contrast</i> | Tse3d_spc     | TR/TE=750/20ms                                                    | 0.5x0.5x0.9mm<br>231x231x51<br>iPAT=2             | 2x 3:49             |

# Reporting checklist for cohort study.

Based on the STROBE cohort guidelines.

## Instructions to authors

Complete this checklist by entering the page numbers from your manuscript where readers will find each of the items listed below.

Your article may not currently address all the items on the checklist. Please modify your text to include the missing information. If you are certain that an item does not apply, please write "n/a" and provide a short explanation.

Upload your completed checklist as an extra file when you submit to a journal.

In your methods section, say that you used the STROBE cohort reporting guidelines, and cite them as:

von Elm E, Altman DG, Egger M, Pocock SJ, Gøtzsche PC, Vandenbroucke JP. The Strengthening the Reporting of Observational Studies in Epidemiology (STROBE) Statement: guidelines for reporting observational studies.

|                           |                     | Reporting Item                                                                                  | Page Number |
|---------------------------|---------------------|-------------------------------------------------------------------------------------------------|-------------|
| <b>Title and abstract</b> |                     |                                                                                                 |             |
| Title                     | <a href="#">#1a</a> | Indicate the study's design with a commonly used term in the title or the abstract              | 1           |
| Abstract                  | <a href="#">#1b</a> | Provide in the abstract an informative and balanced summary of what was done and what was found | 2           |
| <b>Introduction</b>       |                     |                                                                                                 |             |
| Background / rationale    | <a href="#">#2</a>  | Explain the scientific background and rationale for the investigation being reported            | 3           |
| Objectives                | <a href="#">#3</a>  | State specific objectives, including any prespecified hypotheses                                | 4           |
| <b>Methods</b>            |                     |                                                                                                 |             |

|    |                      |                      |                                                                 |      |
|----|----------------------|----------------------|-----------------------------------------------------------------|------|
| 1  | Study design         | <a href="#">#4</a>   | Present key elements of study design early in the paper         | 4    |
| 2  |                      |                      |                                                                 |      |
| 3  | Setting              | <a href="#">#5</a>   | Describe the setting, locations, and relevant dates, including  | 4-11 |
| 4  |                      |                      | periods of recruitment, exposure, follow-up, and data           |      |
| 5  |                      |                      | collection                                                      |      |
| 6  |                      |                      |                                                                 |      |
| 7  |                      |                      |                                                                 |      |
| 8  | Eligibility criteria | <a href="#">#6a</a>  | Give the eligibility criteria, and the sources and methods of   | 4-5  |
| 9  |                      |                      | selection of participants. Describe methods of follow-up.       |      |
| 10 |                      |                      |                                                                 |      |
| 11 |                      |                      |                                                                 |      |
| 12 | Eligibility criteria | <a href="#">#6b</a>  | For matched studies, give matching criteria and number of       | NA   |
| 13 |                      |                      | exposed and unexposed                                           |      |
| 14 |                      |                      |                                                                 |      |
| 15 |                      |                      |                                                                 |      |
| 16 | Variables            | <a href="#">#7</a>   | Clearly define all outcomes, exposures, predictors, potential   | 4-11 |
| 17 |                      |                      | confounders, and effect modifiers. Give diagnostic criteria, if |      |
| 18 |                      |                      | applicable                                                      |      |
| 19 |                      |                      |                                                                 |      |
| 20 |                      |                      |                                                                 |      |
| 21 | Data sources /       | <a href="#">#8</a>   | For each variable of interest give sources of data and details  | 6-7  |
| 22 | measurement          |                      | of methods of assessment (measurement). Describe                |      |
| 23 |                      |                      | comparability of assessment methods if there is more than       |      |
| 24 |                      |                      | one group. Give information separately for for exposed and      |      |
| 25 |                      |                      | unexposed groups if applicable.                                 |      |
| 26 |                      |                      |                                                                 |      |
| 27 |                      |                      |                                                                 |      |
| 28 |                      |                      |                                                                 |      |
| 29 |                      |                      |                                                                 |      |
| 30 | Bias                 | <a href="#">#9</a>   | Describe any efforts to address potential sources of bias       | 4    |
| 31 |                      |                      |                                                                 |      |
| 32 | Study size           | <a href="#">#10</a>  | Explain how the study size was arrived at                       | 10   |
| 33 |                      |                      |                                                                 |      |
| 34 | Quantitative         | <a href="#">#11</a>  | Explain how quantitative variables were handled in the          | 9    |
| 35 | variables            |                      | analyses. If applicable, describe which groupings were          |      |
| 36 |                      |                      | chosen, and why                                                 |      |
| 37 |                      |                      |                                                                 |      |
| 38 |                      |                      |                                                                 |      |
| 39 |                      |                      |                                                                 |      |
| 40 | Statistical          | <a href="#">#12a</a> | Describe all statistical methods, including those used to       | 8-10 |
| 41 | methods              |                      | control for confounding                                         |      |
| 42 |                      |                      |                                                                 |      |
| 43 | Statistical          | <a href="#">#12b</a> | Describe any methods used to examine subgroups and              | 8-10 |
| 44 | methods              |                      | interactions                                                    |      |
| 45 |                      |                      |                                                                 |      |
| 46 |                      |                      |                                                                 |      |
| 47 | Statistical          | <a href="#">#12c</a> | Explain how missing data were addressed                         | 8-10 |
| 48 | methods              |                      |                                                                 |      |
| 49 |                      |                      |                                                                 |      |
| 50 |                      |                      |                                                                 |      |
| 51 | Statistical          | <a href="#">#12d</a> | If applicable, explain how loss to follow-up was addressed      | 10   |
| 52 | methods              |                      |                                                                 |      |
| 53 |                      |                      |                                                                 |      |
| 54 |                      |                      |                                                                 |      |
| 55 | Statistical          | <a href="#">#12e</a> | Describe any sensitivity analyses                               | NA   |
| 56 | methods              |                      |                                                                 |      |
| 57 |                      |                      |                                                                 |      |
| 58 |                      |                      |                                                                 |      |
| 59 |                      |                      |                                                                 |      |
| 60 |                      |                      |                                                                 |      |

## Results

|    |                  |                      |                                                                   |
|----|------------------|----------------------|-------------------------------------------------------------------|
| 1  |                  |                      |                                                                   |
| 2  |                  |                      |                                                                   |
| 3  | Participants     | <a href="#">#13a</a> | Report numbers of individuals at each stage of study—eg           |
| 4  |                  |                      | numbers potentially eligible, examined for eligibility,           |
| 5  |                  |                      | confirmed eligible, included in the study, completing follow-     |
| 6  |                  |                      | up, and analysed. Give information separately for for             |
| 7  |                  |                      | exposed and unexposed groups if applicable.                       |
| 8  |                  |                      |                                                                   |
| 9  |                  |                      |                                                                   |
| 10 |                  |                      |                                                                   |
| 11 | Participants     | <a href="#">#13b</a> | Give reasons for non-participation at each stage                  |
| 12 |                  |                      |                                                                   |
| 13 | Participants     | <a href="#">#13c</a> | Consider use of a flow diagram                                    |
| 14 |                  |                      |                                                                   |
| 15 |                  |                      |                                                                   |
| 16 | Descriptive data | <a href="#">#14a</a> | Give characteristics of study participants (eg demographic,       |
| 17 |                  |                      | clinical, social) and information on exposures and potential      |
| 18 |                  |                      | confounders. Give information separately for exposed and          |
| 19 |                  |                      | unexposed groups if applicable.                                   |
| 20 |                  |                      |                                                                   |
| 21 |                  |                      |                                                                   |
| 22 |                  |                      |                                                                   |
| 23 | Descriptive data | <a href="#">#14b</a> | Indicate number of participants with missing data for each        |
| 24 |                  |                      | variable of interest                                              |
| 25 |                  |                      |                                                                   |
| 26 |                  |                      |                                                                   |
| 27 | Descriptive data | <a href="#">#14c</a> | Summarise follow-up time (eg, average and total amount)           |
| 28 |                  |                      |                                                                   |
| 29 | Outcome data     | <a href="#">#15</a>  | Report numbers of outcome events or summary measures              |
| 30 |                  |                      | over time. Give information separately for exposed and            |
| 31 |                  |                      | unexposed groups if applicable.                                   |
| 32 |                  |                      |                                                                   |
| 33 |                  |                      |                                                                   |
| 34 | Main results     | <a href="#">#16a</a> | Give unadjusted estimates and, if applicable, confounder-         |
| 35 |                  |                      | adjusted estimates and their precision (eg, 95% confidence        |
| 36 |                  |                      | interval). Make clear which confounders were adjusted for         |
| 37 |                  |                      | and why they were included                                        |
| 38 |                  |                      |                                                                   |
| 39 |                  |                      |                                                                   |
| 40 |                  |                      |                                                                   |
| 41 | Main results     | <a href="#">#16b</a> | Report category boundaries when continuous variables were         |
| 42 |                  |                      | categorized                                                       |
| 43 |                  |                      |                                                                   |
| 44 |                  |                      |                                                                   |
| 45 | Main results     | <a href="#">#16c</a> | If relevant, consider translating estimates of relative risk into |
| 46 |                  |                      | absolute risk for a meaningful time period                        |
| 47 |                  |                      |                                                                   |
| 48 |                  |                      |                                                                   |
| 49 | Other analyses   | <a href="#">#17</a>  | Report other analyses done—e.g., analyses of subgroups            |
| 50 |                  |                      | and interactions, and sensitivity analyses                        |
| 51 |                  |                      |                                                                   |
| 52 |                  |                      |                                                                   |

## Discussion

|    |             |                     |                                                          |
|----|-------------|---------------------|----------------------------------------------------------|
| 53 |             |                     |                                                          |
| 54 |             |                     |                                                          |
| 55 | Key results | <a href="#">#18</a> | Summarise key results with reference to study objectives |
| 56 |             |                     |                                                          |
| 57 |             |                     |                                                          |
| 58 |             |                     |                                                          |
| 59 |             |                     |                                                          |
| 60 |             |                     |                                                          |

|    |                    |                     |                                                                |    |
|----|--------------------|---------------------|----------------------------------------------------------------|----|
| 1  | Limitations        | <a href="#">#19</a> | Discuss limitations of the study, taking into account sources  | 12 |
| 2  |                    |                     | of potential bias or imprecision. Discuss both direction and   |    |
| 3  |                    |                     | magnitude of any potential bias.                               |    |
| 4  |                    |                     |                                                                |    |
| 5  |                    |                     |                                                                |    |
| 6  | Interpretation     | <a href="#">#20</a> | Give a cautious overall interpretation considering objectives, | 12 |
| 7  |                    |                     | limitations, multiplicity of analyses, results from similar    |    |
| 8  |                    |                     | studies, and other relevant evidence.                          |    |
| 9  |                    |                     |                                                                |    |
| 10 |                    |                     |                                                                |    |
| 11 | Generalisability   | <a href="#">#21</a> | Discuss the generalisability (external validity) of the study  | 12 |
| 12 |                    |                     | results                                                        |    |
| 13 |                    |                     |                                                                |    |
| 14 |                    |                     |                                                                |    |
| 15 | <b>Other</b>       |                     |                                                                |    |
| 16 | <b>Information</b> |                     |                                                                |    |
| 17 |                    |                     |                                                                |    |
| 18 |                    |                     |                                                                |    |
| 19 | Funding            | <a href="#">#22</a> | Give the source of funding and the role of the funders for the | 17 |
| 20 |                    |                     | present study and, if applicable, for the original study on    |    |
| 21 |                    |                     | which the present article is based                             |    |
| 22 |                    |                     |                                                                |    |
| 23 |                    |                     |                                                                |    |

24 None The STROBE checklist is distributed under the terms of the Creative Commons Attribution  
25 License CC-BY. This checklist can be completed online using <https://www.goodreports.org/>, a tool  
26 made by the [EQUATOR Network](#) in collaboration with [Penelope.ai](#)  
27  
28  
29  
30  
31  
32  
33  
34  
35  
36  
37  
38  
39  
40  
41  
42  
43  
44  
45  
46  
47  
48  
49  
50  
51  
52  
53  
54  
55  
56  
57  
58  
59  
60
