# Supplementary material for: Neuroinflammation in cognitive decline post-cardiac surgery (the FOCUS study): an observational study protocol
Source: PubMed Central journal article supplement — BMJ Open. 2021 May 11;11(5):e044062. doi: 10.1136/bmjopen-2020-044062 (PMC8118022; doi:10.1136/bmjopen-2020-044062), 2021-05-11
Supplement: bmjopen-2020-044062supp001.pdf [file bmjopen-2020-044062supp001.pdf]

## Supplemental material to:

A.M. Peters van Ton et al.,  
*Neuroinflammation in cognitive decline post-cardiac surgery  
 (the FOCUS study): an observational study protocol*

### Appendix 1: MRI scan protocol – parameter settings

|                                                                     | Protocol Name | Sequence/Contrast parameters                                      | Resolution(mm)<br>Matrix Size<br>Parallel Imaging | Duration (min:secs) |
|---------------------------------------------------------------------|---------------|-------------------------------------------------------------------|---------------------------------------------------|---------------------|
| <b>T1-weighted MPRAGE</b>                                           | MPRAGE        | TR/T1/TE=2300/900/2.32ms<br>Flip angle=8°                         | 0.9x0.9x0.9mm<br>240x240x192<br>iPAT=2            | 5:21                |
| <b>T2-weighted TSE TRA</b>                                          | T2_tse_tra    | TR/TE=3500/92 ms<br>Flip angle = 120 °                            | 0.4x0.4x5mm<br>230x173x154                        | 2:01                |
| <b>Susceptibility weighted</b>                                      | F13D_SWI      | TR/TE=27/20ms<br>Flip angle = 15°                                 | 1x1x3mm<br>250x188x156<br>iPAT=2                  | 2:43                |
| <b>FLAIR</b>                                                        | T2_flair      | TR/T1/TE=9000/87/2500ms<br>Flip angle=150°                        | 0.6x0.6x5mm<br>230x173x143                        | 4:32                |
| <b>Field map</b>                                                    | Gre_field     | TR/TE1/TE2=400/5.19/7.65<br>Flip angle= 60°                       | 3.8x3.8x3mm<br>240x240x135                        | 0:54                |
| <b>DTI</b>                                                          | MDDW64        | TR/TE=6900/67<br>Directions=108<br>b-value=1000 s/mm <sup>2</sup> | 2x2x2mm<br>240x240x128<br>iPAT=2                  | 12:47               |
| <b>fMRI</b>                                                         | Ep2d          | TR/TE=2390/30ms<br>Flip angle= 90°                                | 3.5x3.5x3.5<br>224x224x144                        | 6:06                |
| <b>TOF MR angiogram</b>                                             | ToF           | TR/TE=24/3.93ms<br>Flip angle= 15°                                | 0.5x0.5x0.6mm<br>200x150x154<br>iPAT=2            | 11:10               |
| <b>T1-weighted SPACE</b><br><i>pre-contrast &amp; post-contrast</i> | Tse3d_spc     | TR/TE=750/20ms                                                    | 0.5x0.5x0.9mm<br>231x231x51<br>iPAT=2             | 2x 3:49             |
